# Supplementary material for: Proprioceptors-enriched neuronal cultures from induced pluripotent stem cells from Friedreich ataxia patients show altered transcriptomic and proteomic profiles, abnormal neurite extension, and impaired electrophysiological properties
Source: PubMed Central journal article supplement (PMC9972525; doi:10.1093/braincomms/fcad007), 2023-01-18
Supplement: fcad007_Supplementary_Data.pdf [file fcad007_Supplementary_Data.pdf]

**Supplementary Figure 1. Direct comparison of histone post-translational modifications in two FRDA and corresponding ISO CT fully differentiated sensory neuronal cultures**

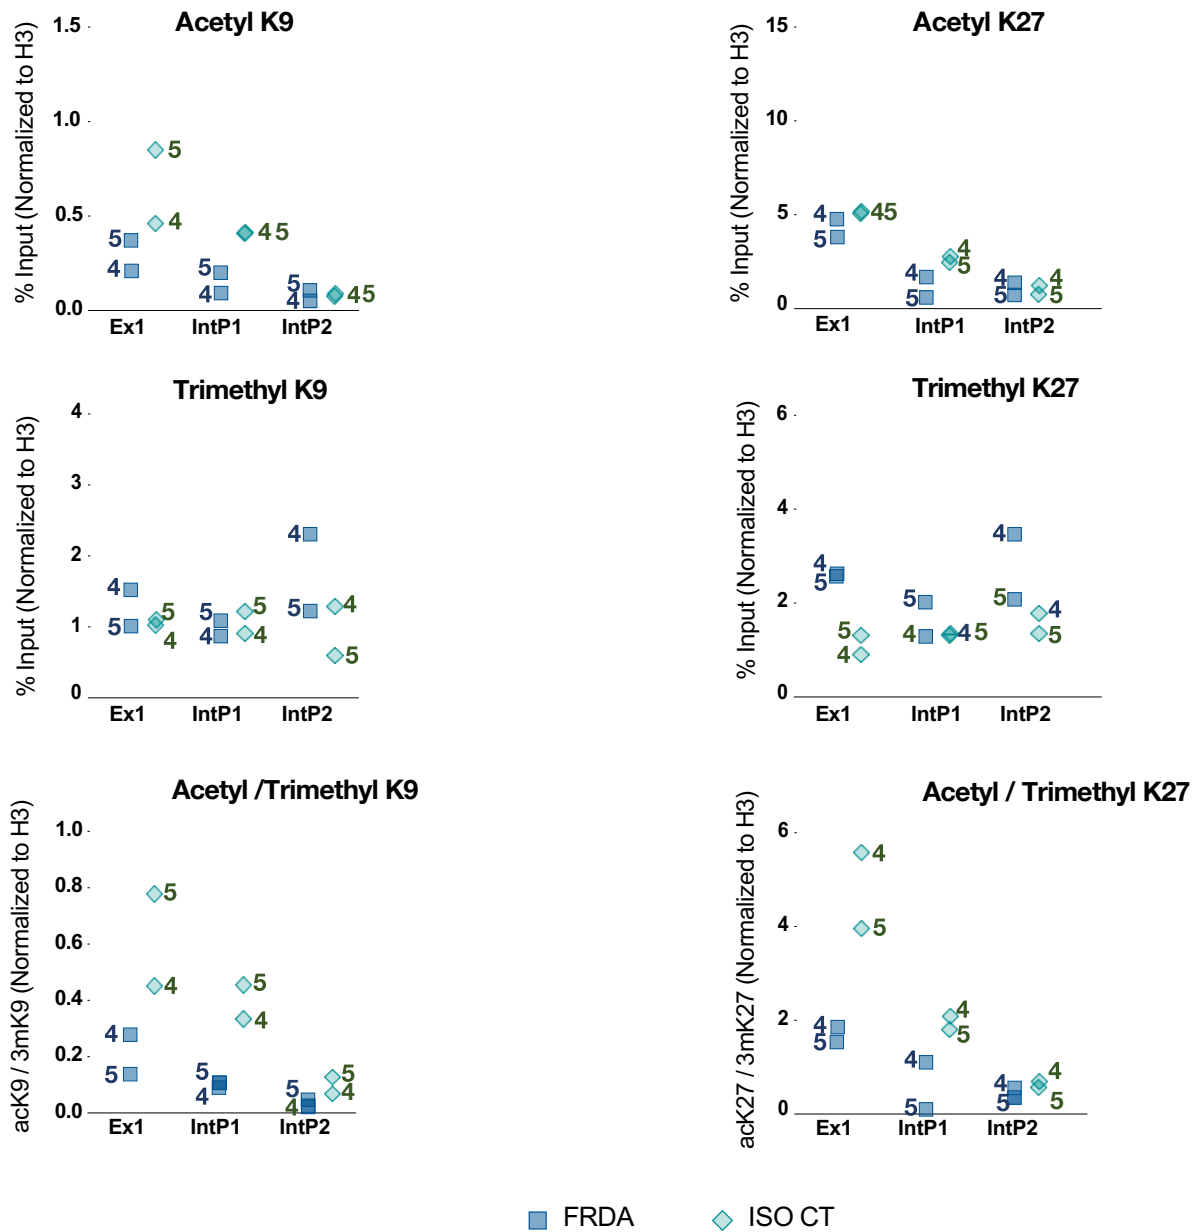

## Supplementary Figure 2. Western Blot analysis of frataxin expression

**A**

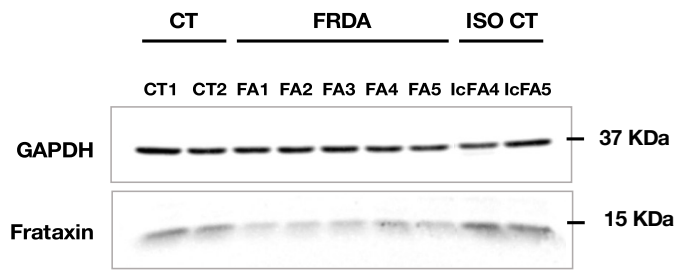

**B**

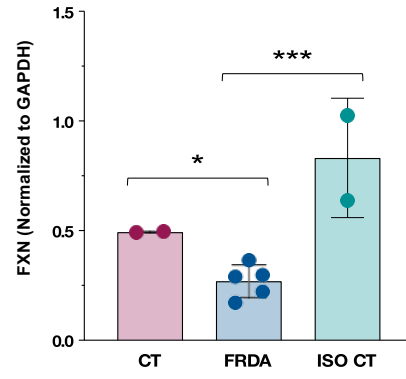

**C**

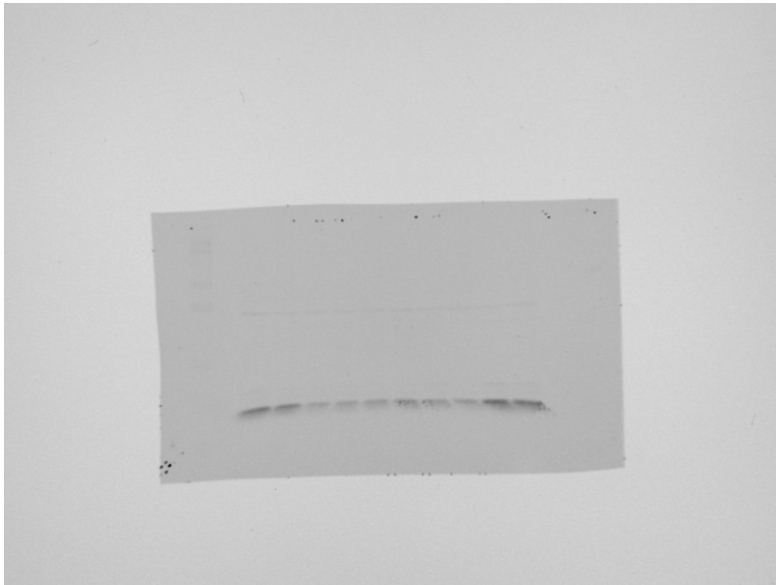

**D**

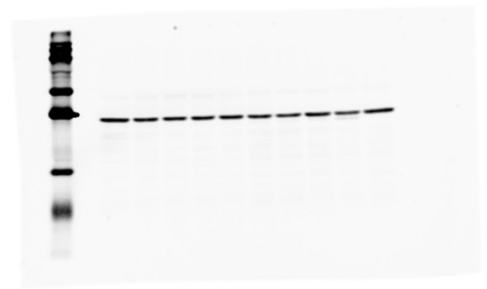

**E**

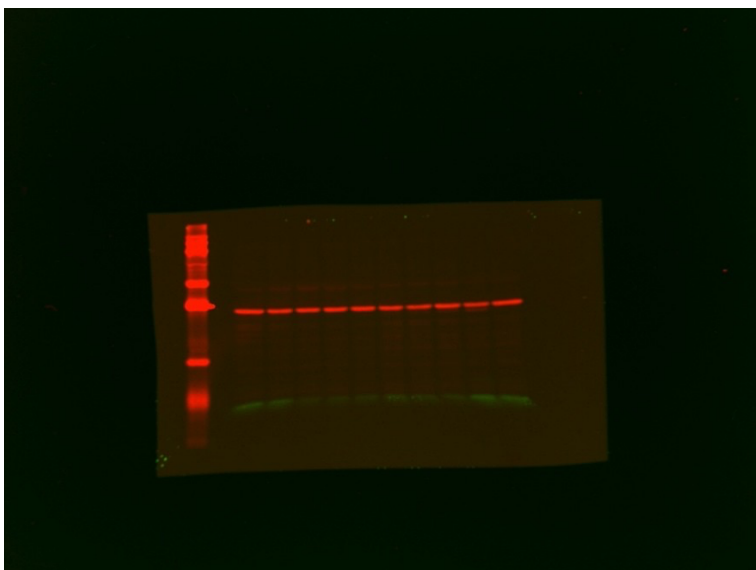

# Supplementary Figure 3. Transcriptome profiling of differentiating isogenic control cultures

**A**

**Upregulated ISO CT vs CT**

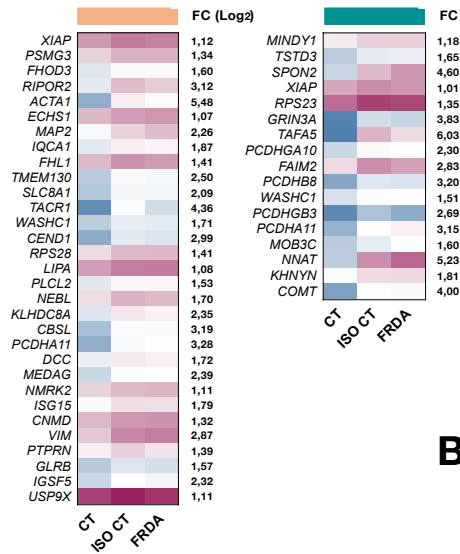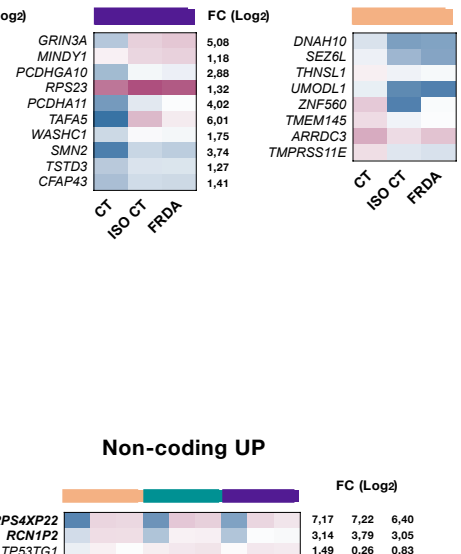

**Downregulated ISO CT vs CT**

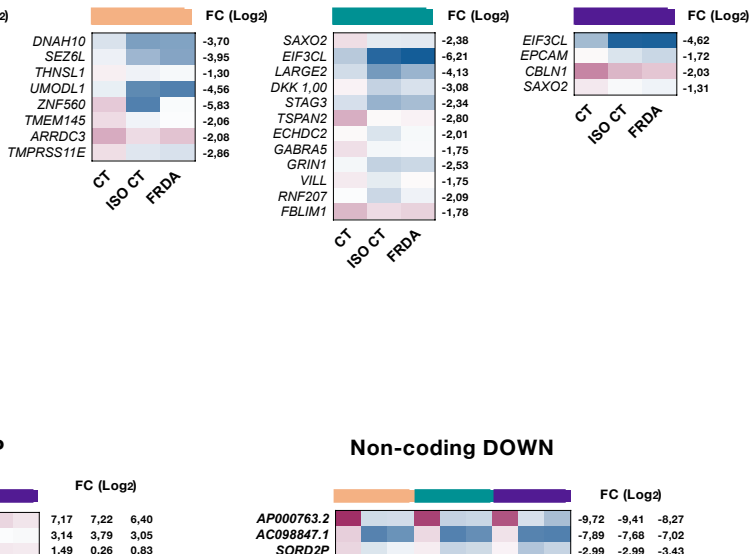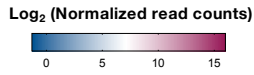

- iPSCs
- Developing neurons
- Mature Neurons

**B**

**Non-coding UP**

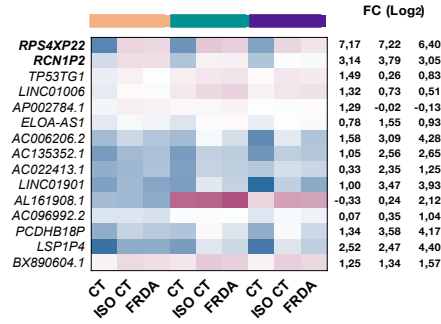

**Non-coding DOWN**

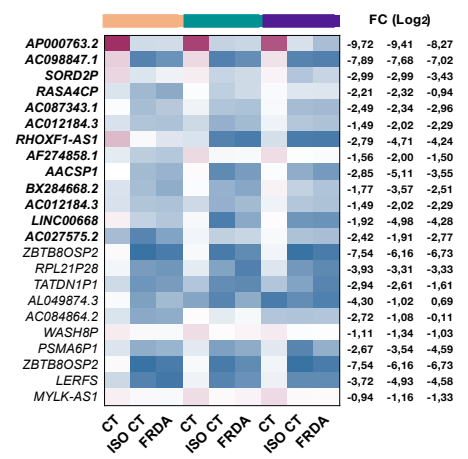

# Supplementary Figure 4. Analysis of sensory neuronal markers in differentiated cultures

## A Proprioceptive markers

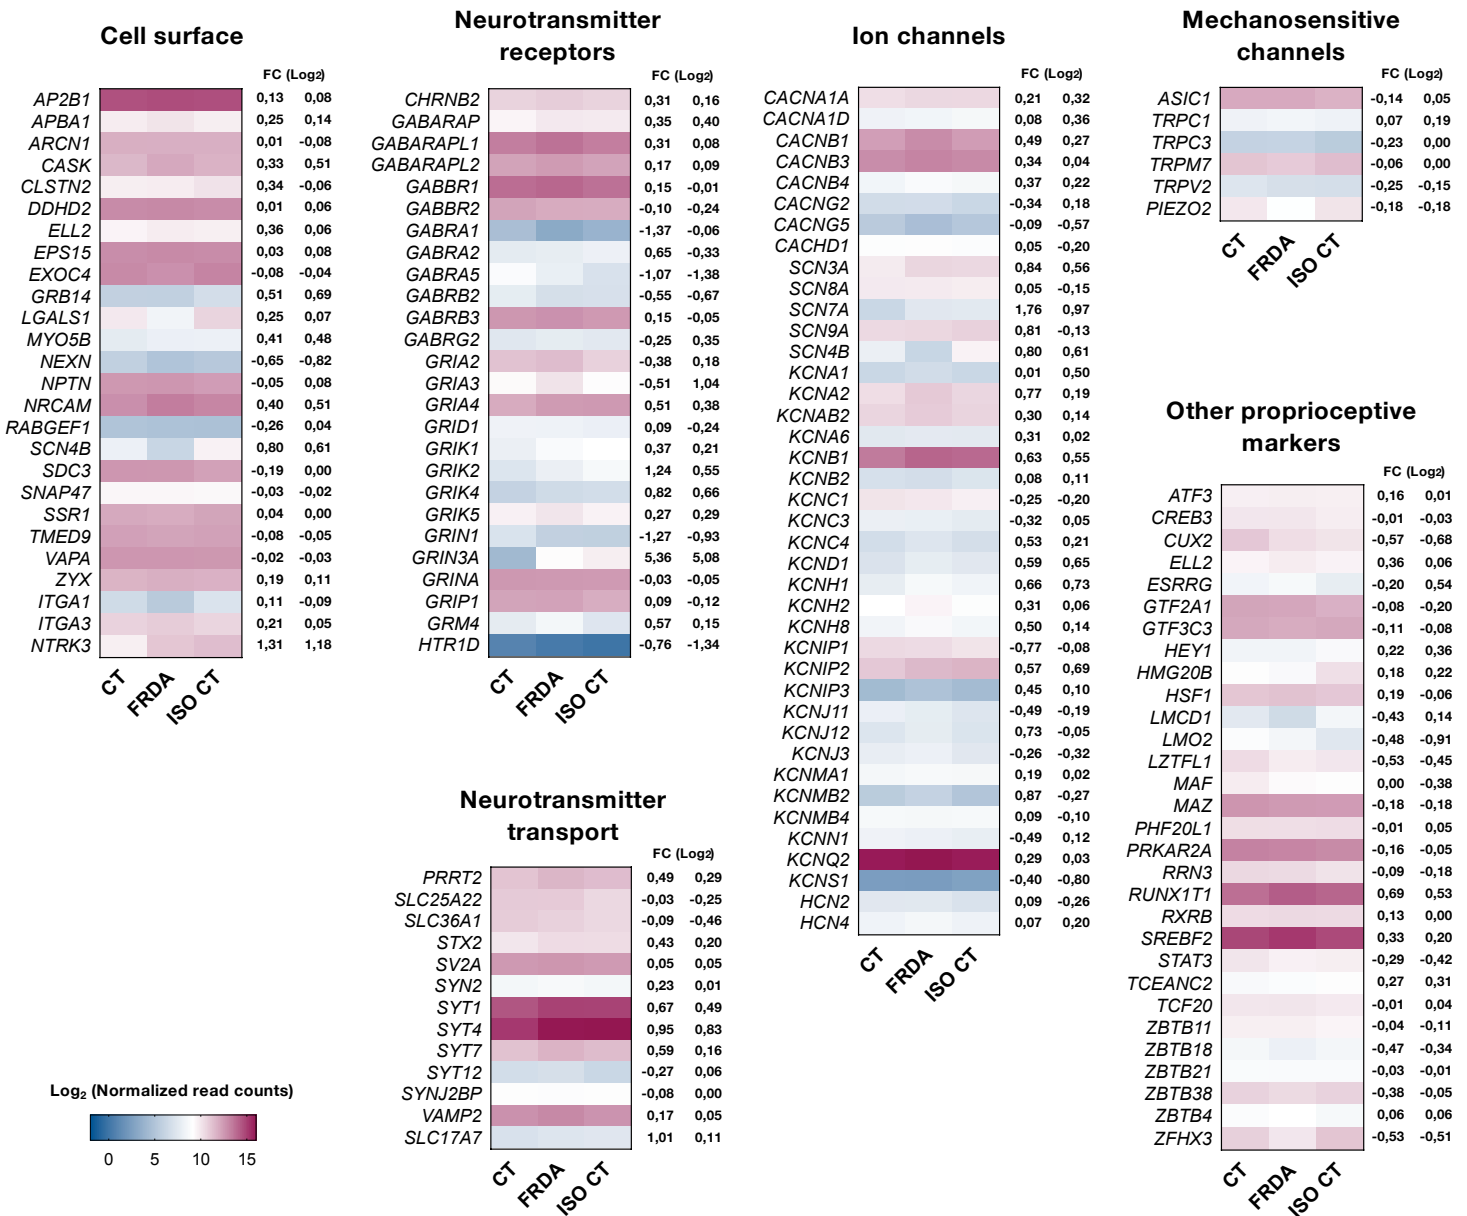

## B Nociceptive and mechanoreceptive markers

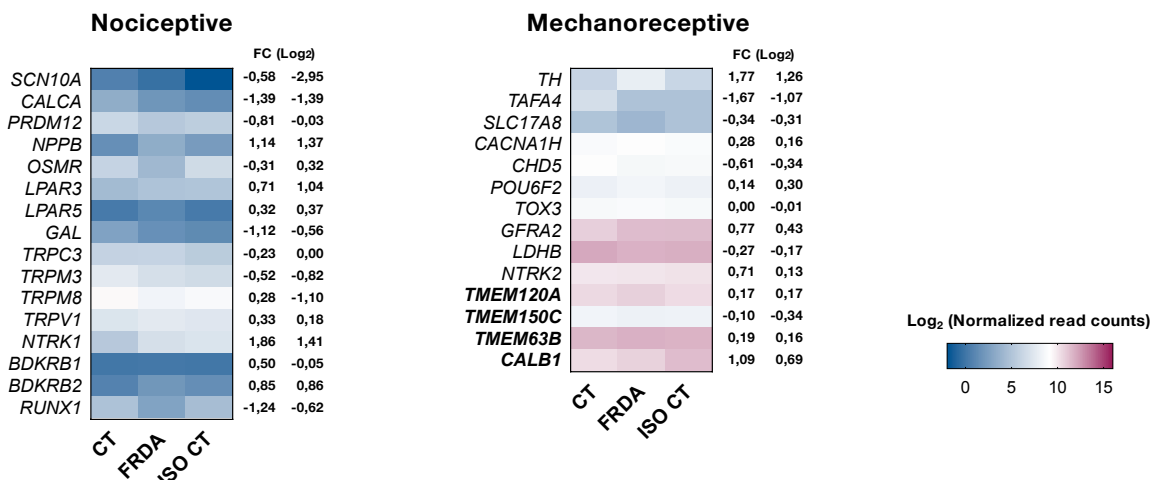

# Supplementary Figure 5. Transcriptome profile comparison of FA4 e FA5 with IcFA4 and IcFA5 for differentially expressed genes (DEGs).

**A**

## Upregulated genes from FRDA vs CT comparison

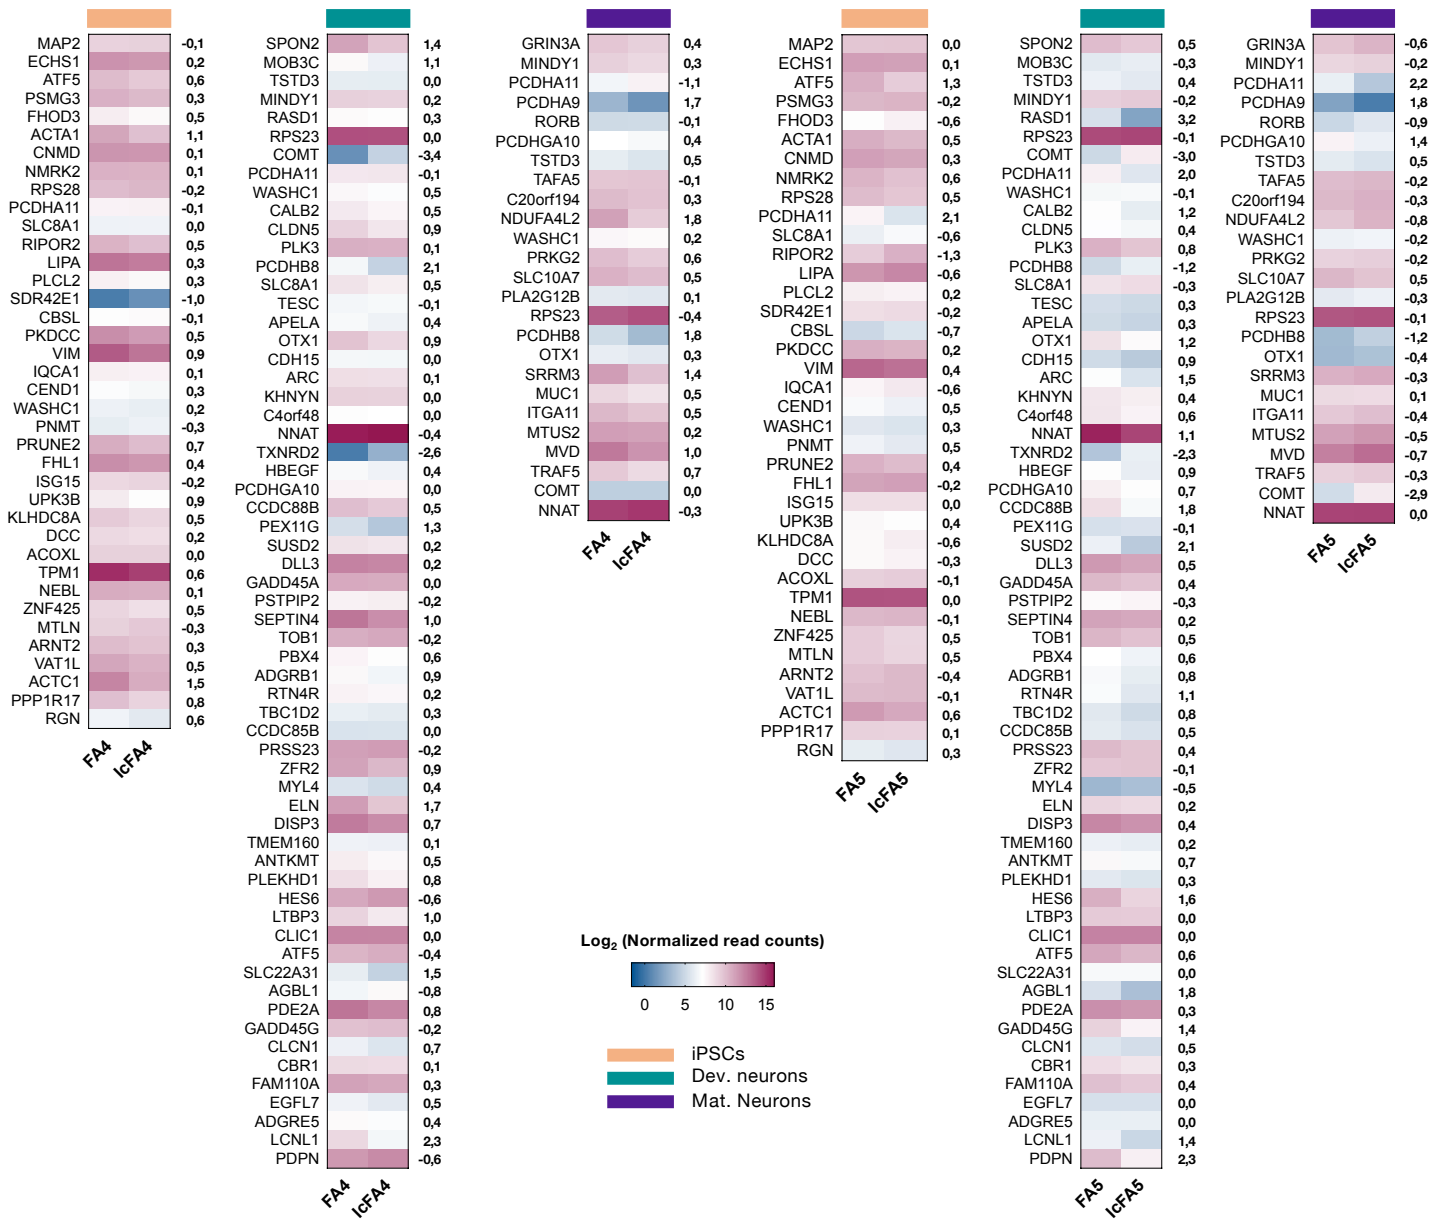

**B**

## Downregulated genes from FRDA vs CT comparison

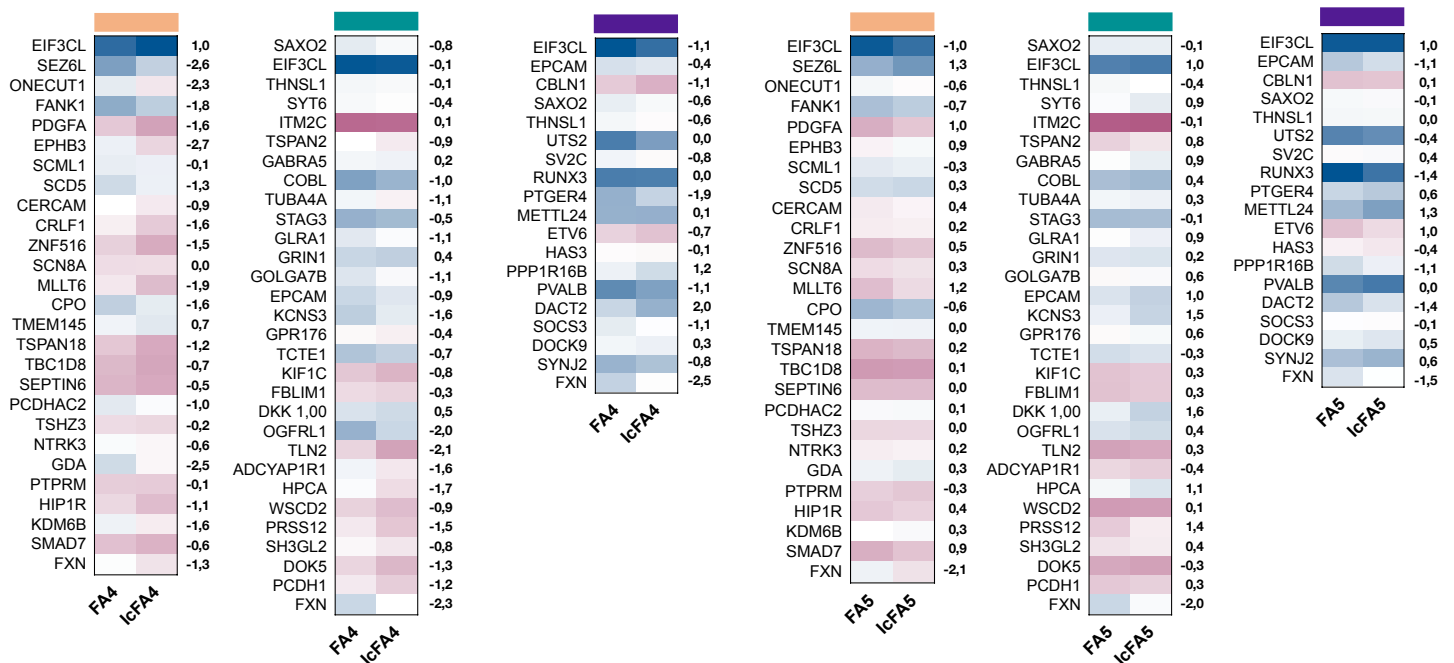

**Supplementary Figure 6. Transcriptome profile comparison of FRDA, CT and ISO CT lines for non-coding RNAs**

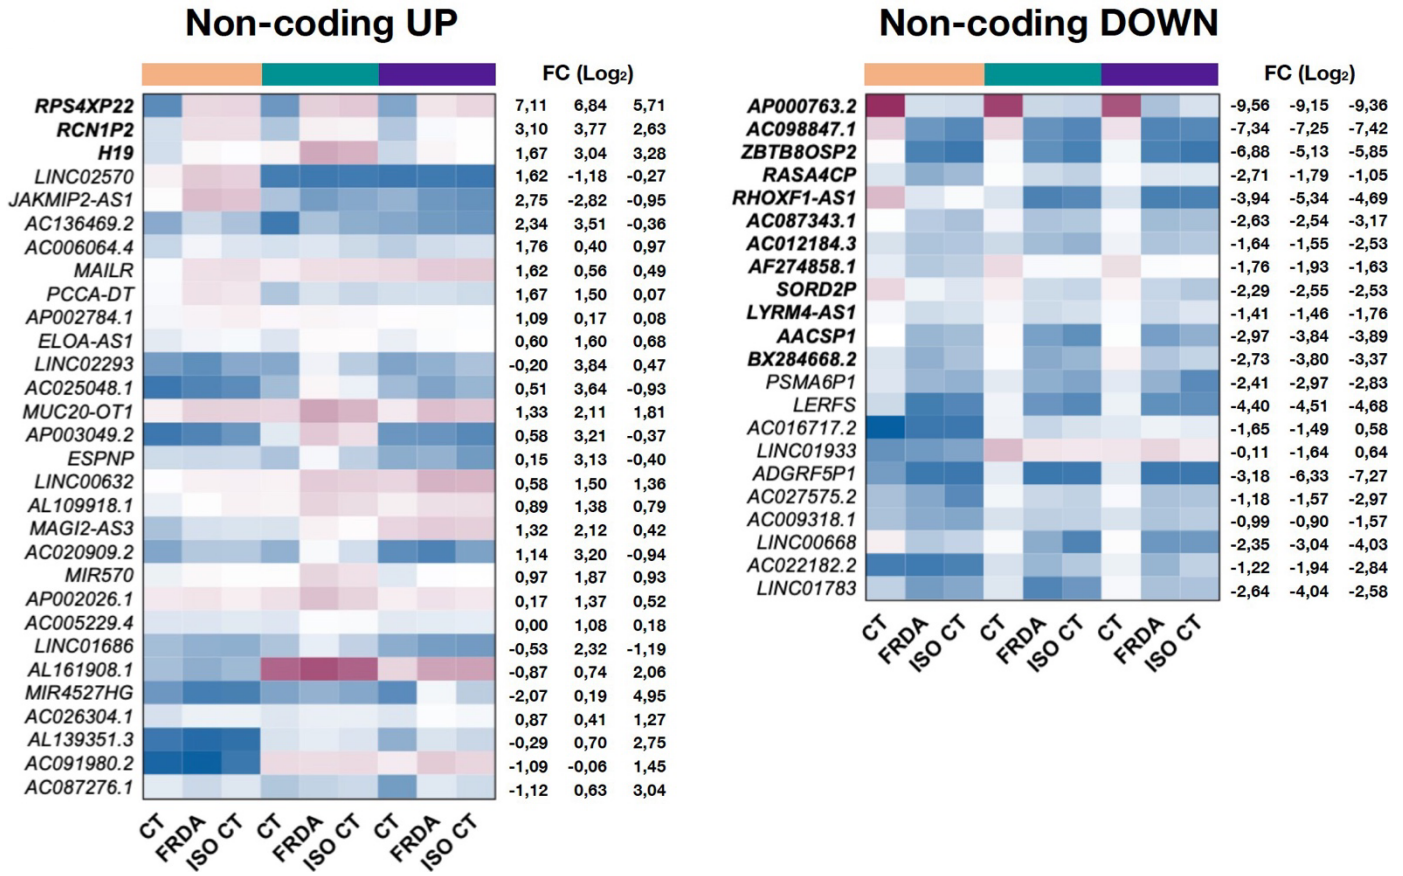

Normalized read counts (Log<sub>2</sub>)

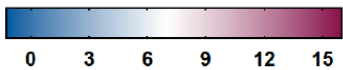

- iPSCs
- Developing neurons
- Mature Neurons

**Supplementary Figure 7. Volcano plots and Venn diagrams of DEPs in FRDA, CT and ISO CT neurons.**

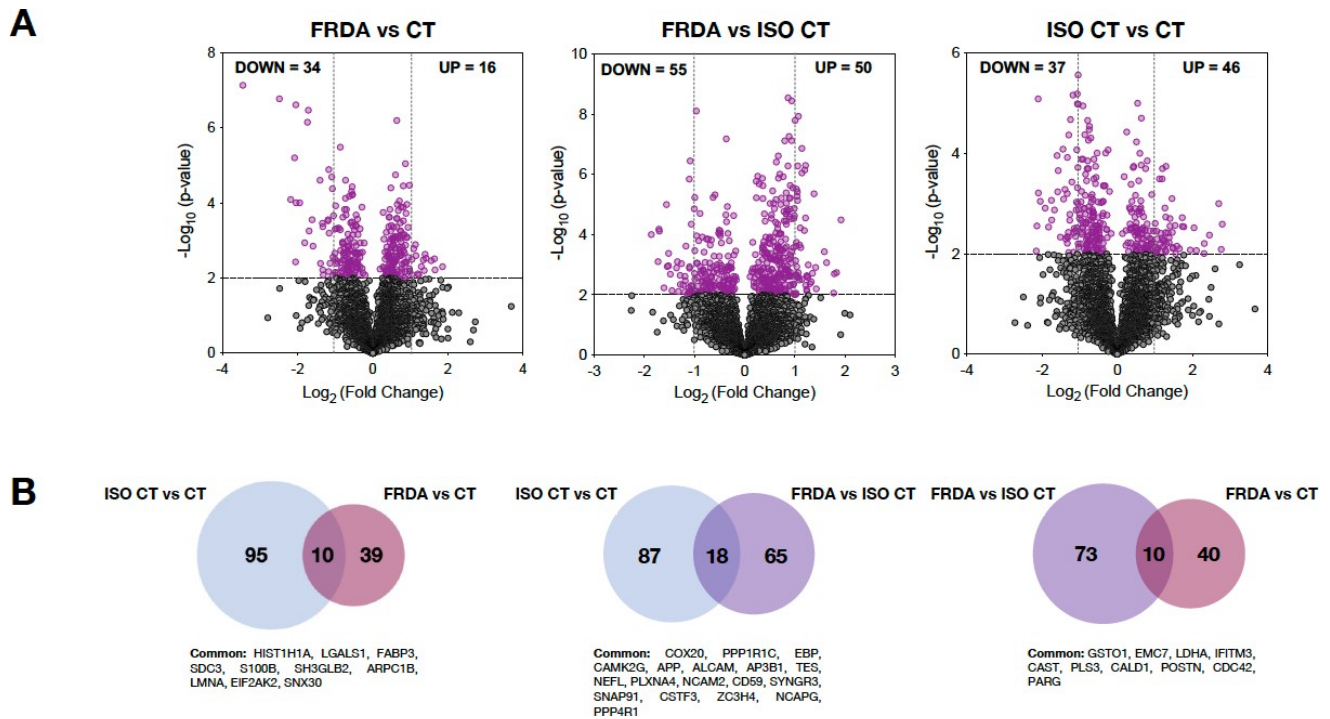

# Supplementary Figure 8. Proteome profile comparison of FA4 e FA5 with IcFA4 and IcFA5 for differentially expressed proteins (DEPs).

**A**

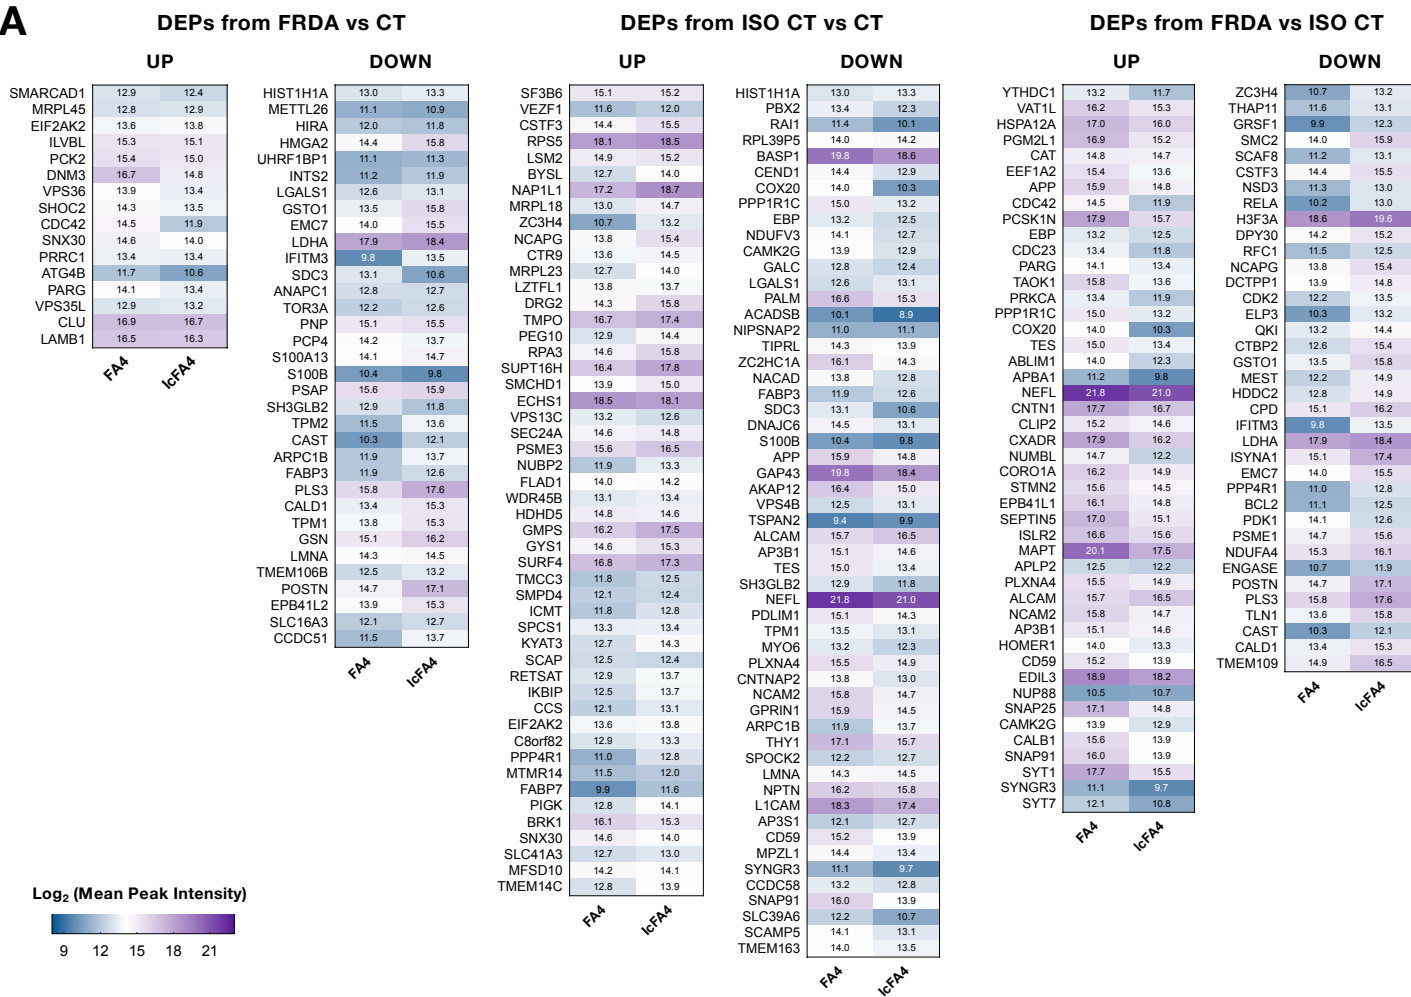

**B**

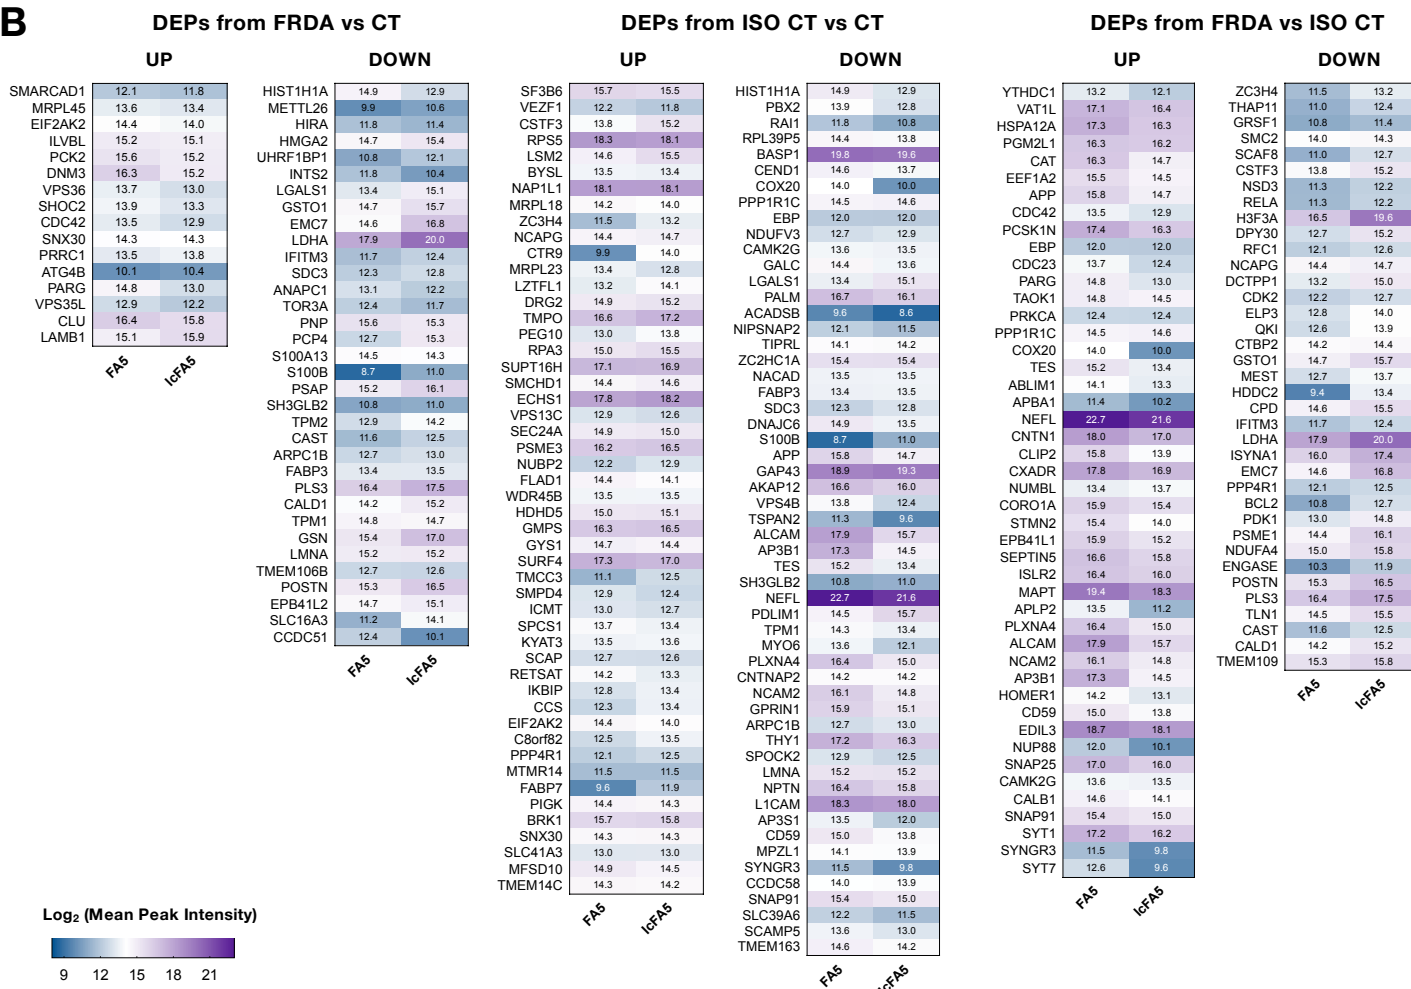



**Supplementary Figure 1. Direct comparison of histone post-translational modifications in two FRDA and corresponding IOS CT fully differentiated neuronal cultures.** Investigation of Histone H3 post-translational modifications of *FXN* 5'-end at exon 1 (Ex1), intronic region (intron 1) upstream (IntP1, IntP2) of GAA expansion as reported in Figure 1. This is an excerpt from Figure 1 in which for clarity results are only shown for ISO CT IcFA4 and IcFA5 (green diamonds) and corresponding FRDA lines FA 4 and FA5 (blue squares), labeled as 4 and 5.

**Supplementary Figure 2. Western Blot analysis of frataxin expression.** Frataxin expression was evaluated by Western Blot in differentiated fully mature neurons in two independent biological replicates per line (n = 2; A: representative blot). Protein expression was normalized to GAPDH. Mean values obtained for each group (CT, FRDA and ISO CT) were compared (Mean  $\pm$  SD). Histograms (B) represent mean values of biological replicates for each group, and error bars represent the standard deviation of mean (SD). Each dot represents the mean of two independent biological replicates per line. A significant decrease in Frataxin expression was observed in FRDA lines compared with CT, along with a recovery of frataxin expression in ISO CT neurons. No significant differences were observed between CT and IC lines (two-way ANOVA with Bonferroni's test for multiple comparisons; \* p < 0.05; \*\*\* p < 0.001). CT: Control; FRDA: Friedreich Ataxia; ISO CT: Isogenic Control. Original uncropped gel images are in C (Frataxin), D (GAPDH), E (Frataxin+GAPDH two-color image). Uncropped gels contain one extra sample (third lane from the right) corresponding to an FRDA line that was not further utilized in the analyses because of aberrant growth and altered karyotype.

**Supplementary Figure 3. Transcriptome profiling of differentiating ISO CT cultures. (A)** Heatmaps representing Differentially Expressed Coding Genes between ISO CT and CT ( $|\text{Log}_2(\text{Fold Change})| > 1$ ; adjusted p-value < 0.1), for each stage of differentiation (yellow: iPSCs; green: developing neurons; violet: mature neurons). For each gene, the  $\log_2(\text{Fold Change})$  between ISO CT and CT lines is shown on the right side of the corresponding heatmap. For each comparison, the transcriptional level of identified DEGs was represented also for the FRDA group. Colour scale represents  $\log_2(\text{Normalized read counts})$  values. **(B)** Heatmaps representing differentially expressed

were analysed and represented as in (B). For each DEG, the  $\log_2(\text{Fold Change})$  between ISO CT and CT lines at each stage of differentiation is shown on the right side of the corresponding heatmap (iPSCs: left; developing neurons: middle; mature neurons: right). Non-coding DEGs common to all stages of differentiation are highlighted in bold. (n=2 for CT; n=5 for FRDA; n=3 for ISO CT).

**Supplementary Figure 4. Analysis of sensory neuronal markers in differentiated cultures.**

Heatmaps representing sensory neuron-specific transcripts detected in differentiated cultures. (A) Proprioceptive-specific genes were schematically separated in categories based on their function or cellular localization. (B) Nociceptive and mechanoreceptive-specific genes expressed in differentiated cultures. Genes common to mechanoreceptive and proprioceptive neurons are highlighted in bold. For each gene, the  $\log_2(\text{Fold Change})$  between FRDA and CT neurons (left) or ISO CT and CT neurons (right) is shown on the right side of the corresponding heatmap. Color scale represents  $\log_2(\text{normalized read counts})$  of transcripts.

**Supplementary Figure 5. Transcriptome profile comparison of FA4 e FA5 with IcFA4 and IcFA5 for differentially expressed genes (DEGs).**

A direct comparison between FRDA and their sibling ISO CT lines was performed for all identified DEGs at the transcriptomic analysis. DEG expression was specifically investigated for upregulated (A) and downregulated (B) genes for lines FA4 and IcFA4 and FA5 and IcFA5, to evaluate the effects induced on gene expression by the removal of the GAA expansion mutation in genetically matched cell lines. For each gene, the ratio between FA4 and IcFA4 or FA5 and IcFA5 is represented on the right side of the corresponding heatmap, in  $\log_2$  scale. Color scale represents  $\log_2(\text{normalized read counts})$  of transcripts. (n=1 for all lines).

**Supplementary Figure 6. Transcriptome profile comparison of FRDA, CT and ISO CT lines for non-coding RNAs.**

Heatmaps representing differentially expressed non-coding genes or pseudogenes between FRDA and CT lines, at all stages of differentiation. For each DEG, the  $\log_2(\text{Fold Change})$  between FRDA and CT lines at each stage of differentiation is shown on the right side of the corresponding heatmap (iPSCs: left; developing neurons: middle; mature neurons:

**Supplementary Figure 7. Volcano plots and Venn diagrams of DEPs in FRDA, CT and ISO CT neurons.** **(A)** Volcano plots of significantly differentially expressed proteins in the comparison between FRDA and CT neurons (left), FRDA and ISO CT neurons (middle) and ISO CT and CT neurons (right). Red dots represent proteins exhibiting significant fold changes ( $p$ -value  $< 0.01$ ). Of those, only proteins with absolute  $\text{Log}_2(\text{Fold Change}) > 1$  were selected for analysis (left and right sides of vertical broken lines). **(B)** Venn Diagrams of identified differentially expressed proteins in the comparison of FRDA and ISO CT neurons versus CT (left), FRDA and CT neurons versus ISO CT (middle) or CT and ISO CT neurons versus FRDA (right). Common identified proteins are indicated under the corresponding diagram.

**Supplementary Figure 8. Proteome profile comparison of FA4 e FA5 with IcFA4 and IcFA5 for differentially expressed proteins (DEPs).** A direct comparison between FRDA and their sibling ISO CT lines was performed for all identified DEPs at the proteomic analysis. DEP expression was specifically investigated for lines FA4 and IcFA4 (A) and FA5 and IcFA5 (B), to evaluate the effects induced on protein expression by the removal of the GAA expansion mutation in genetically matched cell lines. Color scale represents  $\text{log}_2(\text{Mean Peak Intensity})$  values of identified protein spectra. Exact values of Mean Peak Intensities for each protein are indicated in the heatmaps. ( $n=1$  for all lines).

**Supplementary Table 1.** List of primers used for Chromatin Immunoprecipitation

| <b>RT-qPCR Primers</b> | <b>Sequence (5' – 3')</b> |
|------------------------|---------------------------|
| Ex1 Forward            | GGAGCAGCATGTGGACTCTC      |
| Ex1 Reverse            | CGGCGCGGATACTTACTG        |
| IntP1 Forward          | CTCCCGTTGCATTTACT         |
| IntP1 Reverse          | GTGACAAGCATGGAGACAGC      |
| IntP2 Forward          | CTGACCCGACCTTTATTCCA      |
| IntP2 Reverse          | TGGGCGTCACCTTTATCTTC      |
| IntP3 Forward          | GAAACCCAAAGAATGGCTGTG     |
| IntP3 Reverse          | TTCCCTCCTCGTGAAACACC      |
| IntP4 Forward          | CTGGAAAAATAGGCAAGTGTGG    |
| IntP4 Reverse          | CAGGGGTGGAAGCCCAATAC      |
| IntP5 Forward          | CCCTTGACATCTTGGGTAT       |
| IntP5 Reverse          | GAGAAAAGGGTGGGGAAGAG      |

**Supplementary Table 2.** List of identified differentially expressed coding and non-coding genes for iPSCs, developing neurons and mature neurons.

| DIFFERENTIALLY EXPRESSED GENES – iPSCs |      |           |                    |       |           |                |       |           |         |                                                      |     |                                                                                                                                                                                                                                                                                                                                                                                                                                                                                                                                                                                                                                                                                                                                                                                                                                                                                                                                                                                                                                                                                                                                                                                                                                                                                                                                                                                                                                                                                                                                                                                                                                                                                                                                                                                                                                                                                                                                                                                                                                                                                                                    |                                |         |                                  |         |
|----------------------------------------|------|-----------|--------------------|-------|-----------|----------------|-------|-----------|---------|------------------------------------------------------|-----|--------------------------------------------------------------------------------------------------------------------------------------------------------------------------------------------------------------------------------------------------------------------------------------------------------------------------------------------------------------------------------------------------------------------------------------------------------------------------------------------------------------------------------------------------------------------------------------------------------------------------------------------------------------------------------------------------------------------------------------------------------------------------------------------------------------------------------------------------------------------------------------------------------------------------------------------------------------------------------------------------------------------------------------------------------------------------------------------------------------------------------------------------------------------------------------------------------------------------------------------------------------------------------------------------------------------------------------------------------------------------------------------------------------------------------------------------------------------------------------------------------------------------------------------------------------------------------------------------------------------------------------------------------------------------------------------------------------------------------------------------------------------------------------------------------------------------------------------------------------------------------------------------------------------------------------------------------------------------------------------------------------------------------------------------------------------------------------------------------------------|--------------------------------|---------|----------------------------------|---------|
| UPREGULATED GENES                      |      |           |                    |       |           |                |       |           |         |                                                      |     |                                                                                                                                                                                                                                                                                                                                                                                                                                                                                                                                                                                                                                                                                                                                                                                                                                                                                                                                                                                                                                                                                                                                                                                                                                                                                                                                                                                                                                                                                                                                                                                                                                                                                                                                                                                                                                                                                                                                                                                                                                                                                                                    |                                |         |                                  |         |
| Normalized read counts                 |      |           |                    |       |           |                |       |           | GENE    | Description                                          | Chr | GO: Biological process                                                                                                                                                                                                                                                                                                                                                                                                                                                                                                                                                                                                                                                                                                                                                                                                                                                                                                                                                                                                                                                                                                                                                                                                                                                                                                                                                                                                                                                                                                                                                                                                                                                                                                                                                                                                                                                                                                                                                                                                                                                                                             | Log <sub>2</sub> FC<br>FRDA/CT | FDR     | Log <sub>2</sub> FC<br>ISO CT/CT | FDR     |
| iPSCs                                  |      |           | Developing Neurons |       |           | Mature Neurons |       |           |         |                                                      |     |                                                                                                                                                                                                                                                                                                                                                                                                                                                                                                                                                                                                                                                                                                                                                                                                                                                                                                                                                                                                                                                                                                                                                                                                                                                                                                                                                                                                                                                                                                                                                                                                                                                                                                                                                                                                                                                                                                                                                                                                                                                                                                                    |                                |         |                                  |         |
| CT                                     | FRDA | ISO<br>CT | CT                 | FRDA  | ISO<br>CT | CT             | FRDA  | ISO<br>CT |         |                                                      |     |                                                                                                                                                                                                                                                                                                                                                                                                                                                                                                                                                                                                                                                                                                                                                                                                                                                                                                                                                                                                                                                                                                                                                                                                                                                                                                                                                                                                                                                                                                                                                                                                                                                                                                                                                                                                                                                                                                                                                                                                                                                                                                                    |                                |         |                                  |         |
| 104                                    | 1068 | 554       | 48000              | 56547 | 77763     | 43223          | 52417 | 54091     | MAP2    | microtubule associated protein 2                     | 2   | microtubule bundle formation; central nervous system neuron development; microtubule cytoskeleton organization; neuron projection development; regulation of cellular protein localization; regulation of microtubule polymerization; dendrite development; negative regulation of axon extension; negative regulation of microtubule polymerization; dendrite morphogenesis; positive regulation of anterograde dense core granule transport; regulation of organelle transport along microtubule; positive regulation of anterograde synaptic vesicle transport; negative regulation of microtubule binding; negative regulation of microtubule motor activity; cellular response to organic substance; axonogenesis; establishment of cell polarity                                                                                                                                                                                                                                                                                                                                                                                                                                                                                                                                                                                                                                                                                                                                                                                                                                                                                                                                                                                                                                                                                                                                                                                                                                                                                                                                                             | 3,16                           | 1,8E-08 | 2,26                             | 4,8E-03 |
| 1077                                   | 2726 | 2265      | 1583               | 2731  | 2455      | 1204           | 1847  | 1961      | ECHS1   | enoyl-CoA hydratase, short chain 1                   | 10  | lipid metabolic process; fatty acid metabolic process; fatty acid beta-oxidation                                                                                                                                                                                                                                                                                                                                                                                                                                                                                                                                                                                                                                                                                                                                                                                                                                                                                                                                                                                                                                                                                                                                                                                                                                                                                                                                                                                                                                                                                                                                                                                                                                                                                                                                                                                                                                                                                                                                                                                                                                   | 1,33                           | 8,0E-07 | 1,07                             | 3,9E-03 |
| 328                                    | 1210 | 574       | 646                | 1364  | 1120      | 568            | 741   | 640       | ATF5    | activating transcription factor 5                    | 19  | regulation of transcription, DNA-templated; regulation of transcription by RNA polymerase II; negative regulation of apoptotic process; positive regulation of transcription, DNA-templated; fat cell differentiation; negative regulation of cell population proliferation; positive regulation of transcription by RNA polymerase II; negative regulation of transcription, DNA-templated; regulation of centrosome cycle; negative regulation of cell cycle G2/M phase transition; cerebellar granule cell precursor proliferation; circadian rhythm; post-embryonic development; regulation of gene expression; olfactory bulb interneuron differentiation; olfactory bulb interneuron development; olfactory lobe development; multicellular organism growth                                                                                                                                                                                                                                                                                                                                                                                                                                                                                                                                                                                                                                                                                                                                                                                                                                                                                                                                                                                                                                                                                                                                                                                                                                                                                                                                                  | 1,86                           | 3,1E-06 | 0,79                             | 6,6E-01 |
| 521                                    | 1375 | 1331      | 397                | 795   | 721       | 394            | 754   | 690       | PSMG3   | proteasome assembly chaperone 3                      | 7   | chaperone-mediated protein complex assembly                                                                                                                                                                                                                                                                                                                                                                                                                                                                                                                                                                                                                                                                                                                                                                                                                                                                                                                                                                                                                                                                                                                                                                                                                                                                                                                                                                                                                                                                                                                                                                                                                                                                                                                                                                                                                                                                                                                                                                                                                                                                        | 1,39                           | 8,8E-06 | 1,34                             | 4,3E-04 |
| 51                                     | 163  | 157       | 821                | 743   | 782       | 777            | 765   | 756       | FHOD3   | formin homology 2 domain containing 3                | 18  | actin filament organization; cortical actin cytoskeleton organization; cardiac myofibril assembly; sarcomere organization; actin filament network formation; negative regulation of actin filament polymerization                                                                                                                                                                                                                                                                                                                                                                                                                                                                                                                                                                                                                                                                                                                                                                                                                                                                                                                                                                                                                                                                                                                                                                                                                                                                                                                                                                                                                                                                                                                                                                                                                                                                                                                                                                                                                                                                                                  | 1,64                           | 1,1E-05 | 1,60                             | 4,3E-04 |
| 7                                      | 746  | 721       | 48                 | 468   | 76        | 6              | 6     | 5         | ACTA1   | actin alpha 1, skeletal muscle                       | 1   | positive regulation of gene expression; mesenchyme migration; muscle filament sliding; skeletal muscle thin filament assembly; muscle contraction; skeletal muscle fiber development; response to mechanical stimulus; response to extracellular stimulus; response to lithium ion; skeletal muscle fiber adaptation; response to steroid hormone; cellular response to organonitrogen compound                                                                                                                                                                                                                                                                                                                                                                                                                                                                                                                                                                                                                                                                                                                                                                                                                                                                                                                                                                                                                                                                                                                                                                                                                                                                                                                                                                                                                                                                                                                                                                                                                                                                                                                    | 5,68                           | 7,1E-05 | 5,48                             | 1,6E-03 |
| 1063                                   | 2973 | 2627      | 9                  | 2     | 7         | 5              | 3     | 4         | CNMD    | chondromodulin                                       | 13  | multicellular organism development; cell differentiation; cartilage development; negative regulation of angiogenesis; skeletal system development; endothelial cell morphogenesis; negative regulation of endothelial cell proliferation; proteoglycan metabolic process; negative regulation of vascular endothelial growth factor receptor signaling pathway                                                                                                                                                                                                                                                                                                                                                                                                                                                                                                                                                                                                                                                                                                                                                                                                                                                                                                                                                                                                                                                                                                                                                                                                                                                                                                                                                                                                                                                                                                                                                                                                                                                                                                                                                     | 1,52                           | 9,3E-04 | 1,32                             | 4,5E-02 |
| 496                                    | 1160 | 1062      | 5                  | 4     | 3         | 0              | 3     | 3         | NMRK2   | nicotinamide riboside kinase 2                       | 19  | phosphorylation; NAD biosynthetic process; pyridine nucleotide biosynthetic process; NAD metabolic process; negative regulation of myoblast differentiation                                                                                                                                                                                                                                                                                                                                                                                                                                                                                                                                                                                                                                                                                                                                                                                                                                                                                                                                                                                                                                                                                                                                                                                                                                                                                                                                                                                                                                                                                                                                                                                                                                                                                                                                                                                                                                                                                                                                                        | 1,25                           | 1,2E-03 | 1,11                             | 4,1E-02 |
| 397                                    | 1117 | 1068      | 1016               | 1458  | 1513      | 683            | 1189  | 1199      | RPS28   | ribosomal protein S28                                | 19  | translation; cytoplasmic translation; rRNA processing; ribosome biogenesis; ribosomal small subunit biogenesis; ribosomal small subunit assembly; viral transcription; translational initiation; maturation of SSU-rRNA; nuclear-transcribed mRNA catabolic process, nonsense-mediated decay; SRP-dependent cotranslational protein targeting to membrane                                                                                                                                                                                                                                                                                                                                                                                                                                                                                                                                                                                                                                                                                                                                                                                                                                                                                                                                                                                                                                                                                                                                                                                                                                                                                                                                                                                                                                                                                                                                                                                                                                                                                                                                                          | 1,47                           | 1,4E-03 | 1,41                             | 2,0E-02 |
| 10                                     | 144  | 122       | 15                 | 213   | 161       | 4              | 124   | 88        | PCDHA11 | protocadherin alpha 11                               | 5   | homophilic cell adhesion via plasma membrane adhesion molecules; cell adhesion; nervous system development                                                                                                                                                                                                                                                                                                                                                                                                                                                                                                                                                                                                                                                                                                                                                                                                                                                                                                                                                                                                                                                                                                                                                                                                                                                                                                                                                                                                                                                                                                                                                                                                                                                                                                                                                                                                                                                                                                                                                                                                         | 3,53                           | 1,7E-03 | 3,28                             | 3,1E-02 |
| 20                                     | 90   | 92        | 105                | 408   | 253       | 515            | 1063  | 892       | SLC8A1  | solute carrier family 8 member A1                    | 2   | transmembrane transport; calcium ion transport; cell communication; regulation of cardiac muscle contraction by regulation of the release of sequestered calcium ion; negative regulation of protein serine/threonine kinase activity; cellular response to reactive oxygen species; regulation of heart rate; ion transport; sodium ion transport; calcium ion transmembrane transport; sodium ion transmembrane transport; calcium ion import across plasma membrane; positive regulation of bone mineralization; muscle contraction; regulation of cardiac conduction; regulation of cell communication by electrical coupling; cardiac muscle contraction; cellular response to caffeine; calcium ion import; response to muscle stretch; calcium ion homeostasis; cellular calcium ion homeostasis; membrane depolarization during cardiac muscle cell action potential; cellular sodium ion homeostasis; sodium ion export across plasma membrane; relaxation of cardiac muscle; cell communication by electrical coupling involved in cardiac conduction; regulation of cardiac muscle contraction by calcium ion signaling; regulation of gene expression; regulation of the force of heart contraction; sodium ion import across plasma membrane; positive regulation of the force of heart contraction; vascular associated smooth muscle contraction; metal ion transport; relaxation of smooth muscle; negative regulation of cytosolic calcium ion concentration; cardiac muscle cell development; cytosolic calcium ion transport; calcium ion transport into cytosol; regulation of postsynaptic cytosolic calcium ion concentration; response to hypoxia; regulation of sodium ion transport; positive regulation of cytosolic calcium ion concentration; response to nutrient; response to glucose; positive regulation of fibroblast migration; telencephalon development; response to ATP; response to immobilization stress; response to drug; response to hydrogen peroxide; regulation of calcium ion transport; cellular response to cAMP; cellular response to hypoxia; calcium ion export | 2,04                           | 2,0E-03 | 2,09                             | 9,8E-03 |
| 107                                    | 696  | 1051      | 1689               | 1424  | 1415      | 600            | 1188  | 1057      | RIPOR2  | RHO family interacting cell polarization regulator 2 | 6   | sensory perception of sound; skeletal muscle fiber development; cell adhesion; multicellular organism development; cell differentiation; chemotaxis; negative regulation of cell adhesion; muscle organ development; negative regulation of signal transduction; negative regulation of Rho protein signal transduction; establishment of protein localization; protein homooligomerization; positive regulation of filopodium assembly; auditory receptor cell stereocilium organization; cellular response to                                                                                                                                                                                                                                                                                                                                                                                                                                                                                                                                                                                                                                                                                                                                                                                                                                                                                                                                                                                                                                                                                                                                                                                                                                                                                                                                                                                                                                                                                                                                                                                                    | 2,54                           | 2,0E-03 | 3,12                             | 4,3E-04 |



|     |      |      |      |      |      |      |      |      |             |                                                  |    |                                                                                                                                                                                                                                                                                                                                                                                                                                                                                                                                                                                                                                                                                                                                                                                                                                                                                                                                                                                                                                                                                                                                                                                                                                                                                                                                                                                                                                                                                                                                                                                   |      |         |      |         |
|-----|------|------|------|------|------|------|------|------|-------------|--------------------------------------------------|----|-----------------------------------------------------------------------------------------------------------------------------------------------------------------------------------------------------------------------------------------------------------------------------------------------------------------------------------------------------------------------------------------------------------------------------------------------------------------------------------------------------------------------------------------------------------------------------------------------------------------------------------------------------------------------------------------------------------------------------------------------------------------------------------------------------------------------------------------------------------------------------------------------------------------------------------------------------------------------------------------------------------------------------------------------------------------------------------------------------------------------------------------------------------------------------------------------------------------------------------------------------------------------------------------------------------------------------------------------------------------------------------------------------------------------------------------------------------------------------------------------------------------------------------------------------------------------------------|------|---------|------|---------|
| 389 | 1083 | 1313 | 7873 | 8484 | 8831 | 6143 | 5941 | 6777 | NEBL        | nebulette                                        | 10 | muscle fiber development; cardiac muscle thin filament assembly                                                                                                                                                                                                                                                                                                                                                                                                                                                                                                                                                                                                                                                                                                                                                                                                                                                                                                                                                                                                                                                                                                                                                                                                                                                                                                                                                                                                                                                                                                                   | 1,41 | 3,9E-02 | 1,70 | 2,9E-02 |
| 228 | 466  | 381  | 617  | 719  | 887  | 552  | 674  | 699  | ZNF425      | zinc finger protein 425                          | 7  | regulation of transcription, DNA-templated; regulation of transcription by RNA polymerase II; negative regulation of transcription by RNA polymerase II; negative regulation of transcription, DNA-templated                                                                                                                                                                                                                                                                                                                                                                                                                                                                                                                                                                                                                                                                                                                                                                                                                                                                                                                                                                                                                                                                                                                                                                                                                                                                                                                                                                      | 1,02 | 4,6E-02 | 0,73 | 6,6E-01 |
| 338 | 726  | 582  | 182  | 233  | 202  | 222  | 228  | 203  | MTLN        | mitoregulin                                      | 2  | positive regulation of protein-containing complex assembly; positive regulation of mitochondrial membrane potential; positive regulation of sequestering of calcium ion                                                                                                                                                                                                                                                                                                                                                                                                                                                                                                                                                                                                                                                                                                                                                                                                                                                                                                                                                                                                                                                                                                                                                                                                                                                                                                                                                                                                           | 1,10 | 4,7E-02 | 0,78 | 6,8E-01 |
| 337 | 789  | 831  | 3001 | 3313 | 3472 | 5298 | 5382 | 5450 | ARNT2       | aryl hydrocarbon receptor nuclear translocator 2 | 15 | regulation of transcription, DNA-templated; positive regulation of transcription, DNA-templated; positive regulation of transcription by RNA polymerase II; response to hypoxia; xenobiotic metabolic process; brain development; in utero embryonic development; central nervous system development; positive regulation of cell population proliferation; response to estradiol; negative regulation of apoptotic process                                                                                                                                                                                                                                                                                                                                                                                                                                                                                                                                                                                                                                                                                                                                                                                                                                                                                                                                                                                                                                                                                                                                                       | 1,19 | 6,2E-02 | 1,27 | 1,3E-01 |
| 246 | 1400 | 1158 | 336  | 268  | 332  | 4458 | 5744 | 3670 | VAT1L       | vesicle amine transport 1 like                   | 16 | oxidation-reduction process                                                                                                                                                                                                                                                                                                                                                                                                                                                                                                                                                                                                                                                                                                                                                                                                                                                                                                                                                                                                                                                                                                                                                                                                                                                                                                                                                                                                                                                                                                                                                       | 2,33 | 6,2E-02 | 2,06 | 3,9E-01 |
| 206 | 1969 | 1292 | 66   | 500  | 88   | 15   | 13   | 12   | ACTC1       | actin alpha cardiac muscle 1                     | 15 | actin filament organization; positive regulation of gene expression; mesenchyme migration; muscle filament sliding; actin filament-based movement; heart contraction; cardiac myofibril assembly; cardiac muscle tissue morphogenesis; actomyosin structure organization; skeletal muscle thin filament assembly; actin-myosin filament sliding; response to drug; negative regulation of apoptotic process; response to ethanol; cardiac muscle contraction; actin-mediated cell contraction                                                                                                                                                                                                                                                                                                                                                                                                                                                                                                                                                                                                                                                                                                                                                                                                                                                                                                                                                                                                                                                                                     | 3,13 | 6,2E-02 | 2,45 | 5,7E-01 |
| 72  | 523  | 462  | 937  | 1930 | 1552 | 2181 | 2080 | 2477 | PPP1R17     | protein phosphatase 1 regulatory subunit 17      | 7  | regulation of phosphatase activity; negative regulation of phosphoprotein phosphatase activity; negative regulation of catalytic activity; intracellular signal transduction; central nervous system development                                                                                                                                                                                                                                                                                                                                                                                                                                                                                                                                                                                                                                                                                                                                                                                                                                                                                                                                                                                                                                                                                                                                                                                                                                                                                                                                                                  | 2,50 | 7,4E-02 | 2,35 | 3,2E-01 |
| 9   | 45   | 47   | 14   | 27   | 26   | 8    | 10   | 15   | RGN         | regucalcin                                       | X  | positive regulation of ATPase activity; cellular calcium ion homeostasis; regulation of calcium-mediated signaling; L-ascorbic acid biosynthetic process; kidney development; liver development; negative regulation of protein phosphorylation; negative regulation of protein kinase activity; spermatogenesis; aging; positive regulation of triglyceride biosynthetic process; positive regulation of glucose metabolic process; positive regulation of phosphatase activity; negative regulation of phosphoprotein phosphatase activity; negative regulation of GTPase activity; negative regulation of apoptotic process; positive regulation of GTPase activity; negative regulation of nitric oxide biosynthetic process; positive regulation of fatty acid biosynthetic process; negative regulation of epithelial cell proliferation; negative regulation of cyclic-nucleotide phosphodiesterase activity; liver regeneration; negative regulation of flagellated sperm motility; positive regulation of superoxide dismutase activity; positive regulation of ATPase-coupled calcium transmembrane transporter activity; negative regulation of RNA biosynthetic process; negative regulation of bone development; positive regulation of proteolysis involved in cellular protein catabolic process; negative regulation of calcium-dependent ATPase activity; negative regulation of DNA catabolic process; positive regulation of dUTP diphosphatase activity; negative regulation of leucine-tRNA ligase activity; negative regulation of DNA biosynthetic process | 2,22 | 7,4E-02 | 2,24 | 2,2E-01 |
| 39  | 367  | 387  | 14   | 231  | 238  | 15   | 111  | 150  | RCN1P2      | reticulocalbin 1 pseudogene 2                    | 13 |                                                                                                                                                                                                                                                                                                                                                                                                                                                                                                                                                                                                                                                                                                                                                                                                                                                                                                                                                                                                                                                                                                                                                                                                                                                                                                                                                                                                                                                                                                                                                                                   | 3,10 | 4,9E-04 | 3,14 | 3,5E-03 |
| 222 | 653  | 520  | 1    | 0    | 0    | 0    | 0    | 0    | LINC02570   | long intergenic non-protein coding RNA 2570      | 6  |                                                                                                                                                                                                                                                                                                                                                                                                                                                                                                                                                                                                                                                                                                                                                                                                                                                                                                                                                                                                                                                                                                                                                                                                                                                                                                                                                                                                                                                                                                                                                                                   | 1,62 | 1,2E-02 | 1,25 | 3,5E-01 |
| 157 | 1035 | 884  | 30   | 4    | 5    | 7    | 4    | 2    | JAKMIP2-AS1 | JAKMIP2 antisense RNA 1                          | 5  |                                                                                                                                                                                                                                                                                                                                                                                                                                                                                                                                                                                                                                                                                                                                                                                                                                                                                                                                                                                                                                                                                                                                                                                                                                                                                                                                                                                                                                                                                                                                                                                   | 2,75 | 2,0E-02 | 2,44 | 2,1E-01 |
| 5   | 28   | 13   | 1    | 12   | 7    | 5    | 4    | 4    | AC136469.2  | novel transcript                                 | 19 |                                                                                                                                                                                                                                                                                                                                                                                                                                                                                                                                                                                                                                                                                                                                                                                                                                                                                                                                                                                                                                                                                                                                                                                                                                                                                                                                                                                                                                                                                                                                                                                   | 2,34 | 3,2E-02 | 1,23 | 9,3E-01 |
| 26  | 91   | 49   | 39   | 51   | 31   | 19   | 37   | 40   | AC006064.4  | novel transcript, antisense to GAPDH             | 12 |                                                                                                                                                                                                                                                                                                                                                                                                                                                                                                                                                                                                                                                                                                                                                                                                                                                                                                                                                                                                                                                                                                                                                                                                                                                                                                                                                                                                                                                                                                                                                                                   | 1,76 | 4,3E-02 | 0,87 | 1,0E+00 |
| 119 | 382  | 368  | 229  | 343  | 353  | 440  | 616  | 609  | MAILR       | macrophage interferon regulatory lncRNA          | 8  |                                                                                                                                                                                                                                                                                                                                                                                                                                                                                                                                                                                                                                                                                                                                                                                                                                                                                                                                                                                                                                                                                                                                                                                                                                                                                                                                                                                                                                                                                                                                                                                   | 1,62 | 5,3E-02 | 1,57 | 2,4E-01 |
| 102 | 327  | 276  | 14   | 43   | 30   | 40   | 42   | 45   | PCCA-DT     | PCCA divergent transcript                        | 13 |                                                                                                                                                                                                                                                                                                                                                                                                                                                                                                                                                                                                                                                                                                                                                                                                                                                                                                                                                                                                                                                                                                                                                                                                                                                                                                                                                                                                                                                                                                                                                                                   | 1,67 | 7,6E-02 | 1,41 | 4,9E-01 |
| 91  | 196  | 226  | 165  | 186  | 163  | 133  | 141  | 122  | AP002784.1  | novel transcript                                 | 11 |                                                                                                                                                                                                                                                                                                                                                                                                                                                                                                                                                                                                                                                                                                                                                                                                                                                                                                                                                                                                                                                                                                                                                                                                                                                                                                                                                                                                                                                                                                                                                                                   | 1,09 | 8,8E-02 | 1,29 | 7,9E-02 |

**DOWNREGULATED GENES**

| Normalized read counts |      |        |                    |      |        |                |      |        | GENE    | Description                                               | Chr | GO: Biological process                                                                                                                                                                                                                                                                                                                                                                                                                                                                            | Log <sub>2</sub> FC FRDA/CT | FDR     | Log <sub>2</sub> FC ISO CT/CT | FDR     |
|------------------------|------|--------|--------------------|------|--------|----------------|------|--------|---------|-----------------------------------------------------------|-----|---------------------------------------------------------------------------------------------------------------------------------------------------------------------------------------------------------------------------------------------------------------------------------------------------------------------------------------------------------------------------------------------------------------------------------------------------------------------------------------------------|-----------------------------|---------|-------------------------------|---------|
| iPSCs                  |      |        | Developing Neurons |      |        | Mature Neurons |      |        |         |                                                           |     |                                                                                                                                                                                                                                                                                                                                                                                                                                                                                                   |                             |         |                               |         |
| CT                     | FRDA | ISO CT | CT                 | FRDA | ISO CT | CT             | FRDA | ISO CT |         |                                                           |     |                                                                                                                                                                                                                                                                                                                                                                                                                                                                                                   |                             |         |                               |         |
| 19                     | 0    | 0      | 18                 | 0    | 0      | 11             | 0    | 0      | EIF3CL  | eukaryotic translation initiation factor 3 subunit C like | 16  | translational initiation; formation of cytoplasmic translation initiation complex; cytoplasmic translational initiation; translation                                                                                                                                                                                                                                                                                                                                                              | -5,08                       | 1,0E-10 | -5,10                         | 1,8E-07 |
| 224                    | 5    | 12     | 339                | 602  | 492    | 1445           | 2987 | 2702   | SEZ6L   | seizure related 6 homolog like                            | 22  | adult locomotory behavior; cerebellar Purkinje cell layer development; synapse maturation; regulation of protein kinase C signaling                                                                                                                                                                                                                                                                                                                                                               | -5,24                       | 7,0E-10 | -3,95                         | 4,3E-04 |
| 609                    | 93   | 234    | 1481               | 1516 | 1841   | 1778           | 1618 | 1845   | ONECUT1 | one cut homeobox 1                                        | 15  | positive regulation of transcription by RNA polymerase II; cell differentiation; regulation of transcription, DNA-templated; liver development; regulation of cell-matrix adhesion; epithelial cell development; glucose metabolic process; regulation of transcription by RNA polymerase II; Notch signaling pathway; endoderm development; anatomical structure morphogenesis; B cell differentiation; positive regulation of cell migration; negative regulation of transforming growth factor | -2,68                       | 1,8E-04 | -1,34                         | 6,3E-01 |





|       |     |     |       |      |      |       |      |      |            |                                                                      |                                                                                                                                                                                                                                                                                                                                                                                                                                                                                                                                                                                                                                                                                                                                                                                                                                                         |                                                                                                                                                                                                                                                                                                                                                                                                                                                                                                                                                                                                                                                                                                                                                                                                                                                                                                                                                                                                                                                                                                                                                                                                                                                                                                                                                                                                                                                                                                                                                                                                                                                                                                                                                                                                                                                                                                                                                                                                                                                                                                                                                                                                                                                                                                           |       |          |       |         |
|-------|-----|-----|-------|------|------|-------|------|------|------------|----------------------------------------------------------------------|---------------------------------------------------------------------------------------------------------------------------------------------------------------------------------------------------------------------------------------------------------------------------------------------------------------------------------------------------------------------------------------------------------------------------------------------------------------------------------------------------------------------------------------------------------------------------------------------------------------------------------------------------------------------------------------------------------------------------------------------------------------------------------------------------------------------------------------------------------|-----------------------------------------------------------------------------------------------------------------------------------------------------------------------------------------------------------------------------------------------------------------------------------------------------------------------------------------------------------------------------------------------------------------------------------------------------------------------------------------------------------------------------------------------------------------------------------------------------------------------------------------------------------------------------------------------------------------------------------------------------------------------------------------------------------------------------------------------------------------------------------------------------------------------------------------------------------------------------------------------------------------------------------------------------------------------------------------------------------------------------------------------------------------------------------------------------------------------------------------------------------------------------------------------------------------------------------------------------------------------------------------------------------------------------------------------------------------------------------------------------------------------------------------------------------------------------------------------------------------------------------------------------------------------------------------------------------------------------------------------------------------------------------------------------------------------------------------------------------------------------------------------------------------------------------------------------------------------------------------------------------------------------------------------------------------------------------------------------------------------------------------------------------------------------------------------------------------------------------------------------------------------------------------------------------|-------|----------|-------|---------|
|       |     |     |       |      |      |       |      |      |            |                                                                      | chemotaxis; positive regulation of phospholipase C activity; positive regulation of neurotrophin TRK receptor signaling pathway; neuron migration; circadian rhythm; modulation by virus of host transcription; neuronal action potential propagation; myelination in peripheral nervous system; mechanoreceptor differentiation; positive regulation of apoptotic process; response to ethanol; neuron fate specification; response to axon injury; positive regulation of axon extension involved in regeneration; negative regulation of astrocyte differentiation; response to corticosterone; positive regulation of synapse assembly; negative regulation of cell death; lens fiber cell differentiation; cellular response to retinoic acid; cochlea development; regulation of postsynaptic density assembly; regulation of presynapse assembly |                                                                                                                                                                                                                                                                                                                                                                                                                                                                                                                                                                                                                                                                                                                                                                                                                                                                                                                                                                                                                                                                                                                                                                                                                                                                                                                                                                                                                                                                                                                                                                                                                                                                                                                                                                                                                                                                                                                                                                                                                                                                                                                                                                                                                                                                                                           |       |          |       |         |
| 488   | 30  | 223 | 17    | 4    | 9    | 23    | 5    | 15   | GDA        | guanine deaminase                                                    | 9                                                                                                                                                                                                                                                                                                                                                                                                                                                                                                                                                                                                                                                                                                                                                                                                                                                       | guanine catabolic process; nucleobase-containing compound metabolic process; nervous system development; purine nucleotide catabolic process; guanine metabolic process                                                                                                                                                                                                                                                                                                                                                                                                                                                                                                                                                                                                                                                                                                                                                                                                                                                                                                                                                                                                                                                                                                                                                                                                                                                                                                                                                                                                                                                                                                                                                                                                                                                                                                                                                                                                                                                                                                                                                                                                                                                                                                                                   | -3,45 | 5,3E-02  | -0,87 | 1,0E+00 |
| 1535  | 635 | 741 | 340   | 546  | 623  | 5083  | 2919 | 3565 | PTPRM      | protein tyrosine phosphatase receptor type M                         | 18                                                                                                                                                                                                                                                                                                                                                                                                                                                                                                                                                                                                                                                                                                                                                                                                                                                      | protein dephosphorylation; dephosphorylation; cell adhesion; signal transduction; peptidyl-tyrosine dephosphorylation; retina layer formation; negative regulation of angiogenesis; negative regulation of endothelial cell proliferation; negative regulation of endothelial cell migration; homophilic cell adhesion via plasma membrane adhesion molecules; neuron projection development; retinal ganglion cell axon guidance; response to drug; positive regulation of blood vessel diameter                                                                                                                                                                                                                                                                                                                                                                                                                                                                                                                                                                                                                                                                                                                                                                                                                                                                                                                                                                                                                                                                                                                                                                                                                                                                                                                                                                                                                                                                                                                                                                                                                                                                                                                                                                                                         | -1,26 | 5,3E-02  | -1,03 | 4,7E-01 |
| 291   | 115 | 232 | 7511  | 7915 | 6439 | 3463  | 4147 | 3864 | KDM6B      | lysine demethylase 6B                                                | 17                                                                                                                                                                                                                                                                                                                                                                                                                                                                                                                                                                                                                                                                                                                                                                                                                                                      | histone H3-K27 demethylation; positive regulation of transcription by RNA polymerase II; mesodermal cell differentiation; oxidation-reduction process; chromatin organization; inflammatory response; positive regulation of cold-induced thermogenesis; inflammatory response to antigenic stimulus; chromatin remodeling; regulation of gene expression; response to activity; histone demethylation; hippocampus development; cell fate commitment; endothelial cell differentiation; cardiac muscle cell differentiation; response to fungicide; cellular response to hydrogen peroxide                                                                                                                                                                                                                                                                                                                                                                                                                                                                                                                                                                                                                                                                                                                                                                                                                                                                                                                                                                                                                                                                                                                                                                                                                                                                                                                                                                                                                                                                                                                                                                                                                                                                                                               | -1,36 | 7,3E-02  | -0,34 | 1,0E+00 |
| 2244  | 985 | 876 | 218   | 263  | 243  | 512   | 265  | 358  | SMAD7      | SMAD family member 7                                                 | 18                                                                                                                                                                                                                                                                                                                                                                                                                                                                                                                                                                                                                                                                                                                                                                                                                                                      | regulation of transcription, DNA-templated; transforming growth factor beta receptor signaling pathway; negative regulation of protein ubiquitination; protein stabilization; negative regulation of cell migration; negative regulation of BMP signaling pathway; negative regulation of DNA-binding transcription factor activity; regulation of ventricular cardiac muscle cell membrane depolarization; ventricular septum morphogenesis; negative regulation of epithelial to mesenchymal transition; negative regulation of transforming growth factor beta receptor signaling pathway; negative regulation of pathway-restricted SMAD protein phosphorylation; positive regulation of transcription by RNA polymerase II; cell differentiation; anatomical structure morphogenesis; protein deubiquitination; BMP signaling pathway; SMAD protein signal transduction; negative regulation of transcription by RNA polymerase II; positive regulation of proteasomal ubiquitin-dependent protein catabolic process; artery morphogenesis; negative regulation of peptidyl-threonine phosphorylation; ureteric bud development; negative regulation of T cell cytokine production; regulation of epithelial to mesenchymal transition; negative regulation of transcription by competitive promoter binding; regulation of transforming growth factor beta receptor signaling pathway; positive regulation of cell-cell adhesion; negative regulation of ossification; positive regulation of protein ubiquitination; regulation of activin receptor signaling pathway; negative regulation of peptidyl-serine phosphorylation; adherens junction assembly; response to laminar fluid shear stress; cellular protein-containing complex localization; negative regulation of ubiquitin-protein transferase activity; ventricular cardiac muscle tissue morphogenesis; regulation of cardiac muscle contraction; pathway-restricted SMAD protein phosphorylation; cellular response to transforming growth factor beta stimulus; negative regulation of chondrocyte proliferation; positive regulation of chondrocyte hypertrophy; cellular response to leukemia inhibitory factor; negative regulation of T-helper 17 type immune response; negative regulation of T-helper 17 cell differentiation | -1,15 | 8,8E-02  | -1,33 | 1,1E-01 |
| 277   | 92  | 221 | 108   | 31   | 90   | 160   | 46   | 89   | FXN        | frataxin                                                             | 9                                                                                                                                                                                                                                                                                                                                                                                                                                                                                                                                                                                                                                                                                                                                                                                                                                                       | iron-sulfur cluster assembly; oxidation-reduction process; positive regulation of cell population proliferation; negative regulation of apoptotic process; ion transport; cellular iron ion homeostasis; oxidative phosphorylation; heme biosynthetic process; mitochondrion organization; adult walking behavior; aerobic respiration; embryo development ending in birth or egg hatching; proprioception; negative regulation of multicellular organism growth; negative regulation of organ growth; iron ion homeostasis; positive regulation of cell growth; cellular response to hydrogen peroxide; negative regulation of release of cytochrome c from mitochondria; protein autophagy; positive regulation of catalytic activity; small molecule metabolic process; response to iron ion; regulation of ferrochelatase activity; iron incorporation into metallo-sulfur cluster; positive regulation of lyase activity; positive regulation of succinate dehydrogenase activity; positive regulation of aconitate hydratase activity                                                                                                                                                                                                                                                                                                                                                                                                                                                                                                                                                                                                                                                                                                                                                                                                                                                                                                                                                                                                                                                                                                                                                                                                                                                               | -1,51 | 2,4E-01  | -0,29 | 1,0E+00 |
| 33154 | 40  | 35  | 21340 | 34   | 27   | 14136 | 20   | 41   | AP000763.2 | mitochondrially encoded cytochrome c oxidase I (MT-CO1) pseudogene   | 11                                                                                                                                                                                                                                                                                                                                                                                                                                                                                                                                                                                                                                                                                                                                                                                                                                                      |                                                                                                                                                                                                                                                                                                                                                                                                                                                                                                                                                                                                                                                                                                                                                                                                                                                                                                                                                                                                                                                                                                                                                                                                                                                                                                                                                                                                                                                                                                                                                                                                                                                                                                                                                                                                                                                                                                                                                                                                                                                                                                                                                                                                                                                                                                           | -9,56 | 5,9E-130 | -9,72 | 2,8E-94 |
| 552   | 3   | 2   | 421   | 2    | 1    | 305   | 1    | 2    | AC098847.1 | ribosomal protein, large, P0 pseudogene                              | 18                                                                                                                                                                                                                                                                                                                                                                                                                                                                                                                                                                                                                                                                                                                                                                                                                                                      |                                                                                                                                                                                                                                                                                                                                                                                                                                                                                                                                                                                                                                                                                                                                                                                                                                                                                                                                                                                                                                                                                                                                                                                                                                                                                                                                                                                                                                                                                                                                                                                                                                                                                                                                                                                                                                                                                                                                                                                                                                                                                                                                                                                                                                                                                                           | -7,34 | 3,6E-39  | -7,89 | 2,2E-25 |
| 153   | 1   | 0   | 102   | 2    | 1    | 86    | 1    | 0    | ZBTB80SP2  | zinc finger and BTB domain containing 8 opposite strand pseudogene 2 | 2                                                                                                                                                                                                                                                                                                                                                                                                                                                                                                                                                                                                                                                                                                                                                                                                                                                       |                                                                                                                                                                                                                                                                                                                                                                                                                                                                                                                                                                                                                                                                                                                                                                                                                                                                                                                                                                                                                                                                                                                                                                                                                                                                                                                                                                                                                                                                                                                                                                                                                                                                                                                                                                                                                                                                                                                                                                                                                                                                                                                                                                                                                                                                                                           | -6,88 | 2,4E-10  | -7,54 | 6,3E-09 |
| 46    | 7   | 9   | 114   | 32   | 22   | 109   | 52   | 56   | RASA4CP    | RAS p21 protein activator 4C, pseudogene                             | 7                                                                                                                                                                                                                                                                                                                                                                                                                                                                                                                                                                                                                                                                                                                                                                                                                                                       |                                                                                                                                                                                                                                                                                                                                                                                                                                                                                                                                                                                                                                                                                                                                                                                                                                                                                                                                                                                                                                                                                                                                                                                                                                                                                                                                                                                                                                                                                                                                                                                                                                                                                                                                                                                                                                                                                                                                                                                                                                                                                                                                                                                                                                                                                                           | -2,71 | 2,3E-06  | -2,21 | 3,9E-03 |
| 1051  | 53  | 127 | 61    | 1    | 1    | 40    | 1    | 1    | RHOXF1-AS1 | RHOXF1 antisense RNA 1                                               | X                                                                                                                                                                                                                                                                                                                                                                                                                                                                                                                                                                                                                                                                                                                                                                                                                                                       |                                                                                                                                                                                                                                                                                                                                                                                                                                                                                                                                                                                                                                                                                                                                                                                                                                                                                                                                                                                                                                                                                                                                                                                                                                                                                                                                                                                                                                                                                                                                                                                                                                                                                                                                                                                                                                                                                                                                                                                                                                                                                                                                                                                                                                                                                                           | -3,94 | 1,9E-05  | -2,79 | 6,0E-02 |
| 90    | 4   | 5   | 62    | 1    | 5    | 50    | 2    | 4    | RPL21P28   | ribosomal protein L21 pseudogene 28                                  | 1                                                                                                                                                                                                                                                                                                                                                                                                                                                                                                                                                                                                                                                                                                                                                                                                                                                       |                                                                                                                                                                                                                                                                                                                                                                                                                                                                                                                                                                                                                                                                                                                                                                                                                                                                                                                                                                                                                                                                                                                                                                                                                                                                                                                                                                                                                                                                                                                                                                                                                                                                                                                                                                                                                                                                                                                                                                                                                                                                                                                                                                                                                                                                                                           | -4,26 | 2,9E-05  | -3,93 | 2,6E-03 |
| 598   | 284 | 413 | 689   | 652  | 808  | 1239  | 947  | 1120 | NNT-AS1    | NNT antisense RNA 1                                                  | 5                                                                                                                                                                                                                                                                                                                                                                                                                                                                                                                                                                                                                                                                                                                                                                                                                                                       |                                                                                                                                                                                                                                                                                                                                                                                                                                                                                                                                                                                                                                                                                                                                                                                                                                                                                                                                                                                                                                                                                                                                                                                                                                                                                                                                                                                                                                                                                                                                                                                                                                                                                                                                                                                                                                                                                                                                                                                                                                                                                                                                                                                                                                                                                                           | -1,07 | 1,2E-04  | -0,53 | 6,3E-01 |
| 117   | 18  | 20  | 86    | 14   | 16   | 101   | 10   | 12   | AC087343.1 | ribosomal protein L21 (RPL21) pseudogene                             | 8                                                                                                                                                                                                                                                                                                                                                                                                                                                                                                                                                                                                                                                                                                                                                                                                                                                       |                                                                                                                                                                                                                                                                                                                                                                                                                                                                                                                                                                                                                                                                                                                                                                                                                                                                                                                                                                                                                                                                                                                                                                                                                                                                                                                                                                                                                                                                                                                                                                                                                                                                                                                                                                                                                                                                                                                                                                                                                                                                                                                                                                                                                                                                                                           | -2,63 | 1,7E-04  | -2,49 | 5,5E-03 |
| 44    | 14  | 15  | 32    | 11   | 8    | 80    | 14   | 16   | AC012184.3 | novel transcript, antisense to DDX19B and DDX19A                     | 16                                                                                                                                                                                                                                                                                                                                                                                                                                                                                                                                                                                                                                                                                                                                                                                                                                                      |                                                                                                                                                                                                                                                                                                                                                                                                                                                                                                                                                                                                                                                                                                                                                                                                                                                                                                                                                                                                                                                                                                                                                                                                                                                                                                                                                                                                                                                                                                                                                                                                                                                                                                                                                                                                                                                                                                                                                                                                                                                                                                                                                                                                                                                                                                           | -1,64 | 2,0E-03  | -1,49 | 4,5E-02 |
| 60    | 17  | 20  | 404   | 104  | 98   | 364   | 115  | 126  | AF274858.1 | Morf4 family associated protein 1 (MRFAP1) pseudogene                | X                                                                                                                                                                                                                                                                                                                                                                                                                                                                                                                                                                                                                                                                                                                                                                                                                                                       |                                                                                                                                                                                                                                                                                                                                                                                                                                                                                                                                                                                                                                                                                                                                                                                                                                                                                                                                                                                                                                                                                                                                                                                                                                                                                                                                                                                                                                                                                                                                                                                                                                                                                                                                                                                                                                                                                                                                                                                                                                                                                                                                                                                                                                                                                                           | -1,76 | 2,0E-03  | -1,56 | 6,6E-02 |

|     |     |     |      |      |      |     |     |     |            |                                                                          |    |  |       |         |       |         |
|-----|-----|-----|------|------|------|-----|-----|-----|------------|--------------------------------------------------------------------------|----|--|-------|---------|-------|---------|
| 442 | 84  | 51  | 223  | 36   | 26   | 185 | 31  | 16  | SORD2P     | sorbitol dehydrogenase 2, pseudogene                                     | 15 |  | -2,29 | 2,4E-03 | -2,99 | 1,7E-04 |
| 121 | 36  | 50  | 224  | 277  | 213  | 286 | 233 | 184 | AL359881.1 | novel transcript                                                         | 1  |  | -1,74 | 2,6E-03 | -1,24 | 2,9E-01 |
| 231 | 106 | 106 | 353  | 178  | 138  | 238 | 135 | 116 | WASH8P     | WAS protein family homolog 8, pseudogene                                 | 12 |  | -1,11 | 7,8E-03 | -1,11 | 4,6E-02 |
| 167 | 34  | 73  | 265  | 146  | 153  | 407 | 220 | 244 | LINC02175  | long intergenic non-protein coding RNA 2175                              | 16 |  | -2,24 | 1,2E-02 | -1,16 | 8,7E-01 |
| 72  | 20  | 27  | 3    | 8    | 7    | 5   | 7   | 9   | AP003170.1 | interferon stimulated exonuclease gene 20kDa-like 2 (ISG20L2) pseudogene | 11 |  | -1,79 | 2,0E-02 | -1,35 | 4,5E-01 |
| 42  | 11  | 18  | 181  | 126  | 105  | 190 | 124 | 116 | AL359881.2 | novel transcript                                                         | 1  |  | -1,84 | 2,2E-02 | -1,19 | 6,6E-01 |
| 84  | 31  | 35  | 92   | 97   | 105  | 116 | 97  | 124 | CDC37L1-DT | CDC37L1 divergent transcript                                             | 9  |  | -1,38 | 2,3E-02 | -1,24 | 2,5E-01 |
| 92  | 34  | 40  | 89   | 32   | 39   | 107 | 31  | 51  | LYRM4-AS1  | LYRM4 antisense RNA 1                                                    | 6  |  | -1,41 | 2,4E-02 | -1,16 | 3,6E-01 |
| 222 | 93  | 111 | 12   | 7    | 10   | 20  | 12  | 12  | AC022893.1 | novel transcript                                                         | 8  |  | -1,22 | 3,0E-02 | -0,97 | 4,4E-01 |
| 57  | 10  | 10  | 5    | 2    | 2    | 14  | 1   | 1   | AC034102.1 | RAB13 member RAS oncogene family pseudogene                              | 12 |  | -2,41 | 3,0E-02 | -2,42 | 1,3E-01 |
| 64  | 16  | 41  | 1615 | 1815 | 1378 | 411 | 386 | 419 | SLC26A10   | solute carrier family 26 member 10                                       | 12 |  | -1,96 | 6,2E-02 | -0,65 | 1,0E+00 |
| 48  | 9   | 6   | 149  | 108  | 66   | 16  | 22  | 15  | AC084864.2 | novel transcript                                                         | 7  |  | -2,32 | 6,5E-02 | -2,72 | 8,3E-02 |
| 128 | 13  | 14  | 146  | 8    | 3    | 115 | 6   | 7   | AACSP1     | acetoacetyl-CoA synthetase pseudogene 1                                  | 5  |  | -2,97 | 8,0E-02 | -2,85 | 3,1E-01 |

**DIFFERENTIALLY EXPRESSED GENES – DEVELOPING NEURONS**

**UPREGULATED GENES**

| Normalized read counts |       |        |                    |       |        |                |       |        | GENE    | Description                                            | Chr | GO: Biological process                                                                                                                                                                                                                                                                                                                                                                                                                                                                                                                                                                                                                                                                                                                                           | Log2FC FRDA/CT | FDR     | Log2FC ISO CT/CT | FDR     |
|------------------------|-------|--------|--------------------|-------|--------|----------------|-------|--------|---------|--------------------------------------------------------|-----|------------------------------------------------------------------------------------------------------------------------------------------------------------------------------------------------------------------------------------------------------------------------------------------------------------------------------------------------------------------------------------------------------------------------------------------------------------------------------------------------------------------------------------------------------------------------------------------------------------------------------------------------------------------------------------------------------------------------------------------------------------------|----------------|---------|------------------|---------|
| iPSCs                  |       |        | Developing Neurons |       |        | Mature Neurons |       |        |         |                                                        |     |                                                                                                                                                                                                                                                                                                                                                                                                                                                                                                                                                                                                                                                                                                                                                                  |                |         |                  |         |
| CT                     | FRDA  | ISO CT | CT                 | FRDA  | ISO CT | CT             | FRDA  | ISO CT |         |                                                        |     |                                                                                                                                                                                                                                                                                                                                                                                                                                                                                                                                                                                                                                                                                                                                                                  |                |         |                  |         |
| 18                     | 42    | 36     | 36                 | 3878  | 1143   | 8              | 73    | 74     | SPON2   | spondin 2                                              | 4   | cell adhesion; immune system process; innate immune response; mast cell mediated immunity; opsonization; response to lipopolysaccharide; positive regulation of interleukin-6 production; positive regulation of tumor necrosis factor production; defense response to bacterium; induction of bacterial agglutination; defense response to fungus; defense response to virus; positive regulation of macrophage cytokine production; cellular response to lipopolysaccharide                                                                                                                                                                                                                                                                                    | 6,38           | 7,9E-12 | 4,60             | 1,4E-04 |
| 58                     | 92    | 110    | 20                 | 127   | 63     | 43             | 99    | 81     | MOB3C   | MOB kinase activator 3C                                | 1   |                                                                                                                                                                                                                                                                                                                                                                                                                                                                                                                                                                                                                                                                                                                                                                  | 2,60           | 4,2E-08 | 1,60             | 5,0E-02 |
| 22                     | 40    | 49     | 19                 | 69    | 61     | 18             | 48    | 44     | TSTD3   | thiosulfate sulfurtransferase like domain containing 3 | 6   |                                                                                                                                                                                                                                                                                                                                                                                                                                                                                                                                                                                                                                                                                                                                                                  | 1,83           | 3,0E-07 | 1,65             | 1,3E-04 |
| 122                    | 192   | 190    | 234                | 533   | 531    | 194            | 500   | 441    | MINDY1  | MINDY lysine 48 deubiquitinase 1                       | 1   | proteolysis; protein K48-linked deubiquitination                                                                                                                                                                                                                                                                                                                                                                                                                                                                                                                                                                                                                                                                                                                 | 1,19           | 1,8E-06 | 1,18             | 4,7E-05 |
| 22                     | 21    | 26     | 13                 | 329   | 78     | 28             | 38    | 39     | RASD1   | ras related dexamethasone induced 1                    | 17  | signal transduction; G protein-coupled receptor signaling pathway; nitric oxide mediated signal transduction; negative regulation of transcription, DNA-templated                                                                                                                                                                                                                                                                                                                                                                                                                                                                                                                                                                                                | 4,29           | 4,0E-04 | 2,28             | 6,8E-01 |
| 10886                  | 15191 | 13263  | 8254               | 19031 | 21163  | 6392           | 12889 | 16069  | RPS23   | ribosomal protein S23                                  | 5   | translation; cytoplasmic translation; viral transcription; translational initiation; stress granule assembly; nuclear-transcribed mRNA catabolic process, nonsense-mediated decay; SRP-dependent cotranslational protein targeting to membrane; maintenance of translational fidelity                                                                                                                                                                                                                                                                                                                                                                                                                                                                            | 1,20           | 7,4E-04 | 1,35             | 4,8E-04 |
| 371                    | 477   | 336    | 4                  | 396   | 191    | 17             | 341   | 188    | COMT    | catechol-O-methyltransferase                           | 22  | catecholamine metabolic process; neurotransmitter catabolic process; methylation; developmental process; dopamine metabolic process; catecholamine catabolic process; response to organic cyclic compound; response to drug; short-term memory; cellular response to phosphate starvation; dopamine catabolic process; female pregnancy; learning; estrogen metabolic process; response to lipopolysaccharide; negative regulation of renal sodium excretion; response to estrogen; negative regulation of dopamine metabolic process; response to pain; multicellular organismal reproductive process; negative regulation of smooth muscle cell proliferation; positive regulation of homocysteine metabolic process; regulation of sensory perception of pain | 4,98           | 1,1E-03 | 4,00             | 1,1E-01 |
| 10                     | 144   | 122    | 15                 | 213   | 161    | 4              | 124   | 88     | PCDHA11 | protocadherin alpha 11                                 | 5   | homophilic cell adhesion via plasma membrane adhesion molecules; cell adhesion; nervous system development                                                                                                                                                                                                                                                                                                                                                                                                                                                                                                                                                                                                                                                       | 3,58           | 1,4E-03 | 3,15             | 4,9E-02 |
| 20                     | 62    | 68     | 41                 | 130   | 118    | 32             | 99    | 109    | WASHC1  | WASH complex subunit 1                                 | 9   | Arp2/3 complex-mediated actin nucleation; protein transport; exocytosis; extracellular matrix disassembly; positive regulation of cell migration; negative regulation of autophagy; endosomal transport; positive regulation of pseudopodium assembly; regulation of protein ubiquitination;                                                                                                                                                                                                                                                                                                                                                                                                                                                                     | 1,66           | 1,8E-03 | 1,51             | 3,9E-02 |

|     |      |      |     |       |       |     |       |       |                |                                                    |    |                                                                                                                                                                                                                                                                                                                                                                                                                                                                                                                                                                                                                                                                                                                                                                                                                                                                                                                                                                                                                                                                                                                                                                                                                                                                                                                                                                                                                                                                                                                                                                                                                                                                                                                                                                                                                                                                                                                                                                                                                                                                                                                    |      |         |      |  |         |  |                                                                                                                                                           |  |  |  |  |  |  |  |
|-----|------|------|-----|-------|-------|-----|-------|-------|----------------|----------------------------------------------------|----|--------------------------------------------------------------------------------------------------------------------------------------------------------------------------------------------------------------------------------------------------------------------------------------------------------------------------------------------------------------------------------------------------------------------------------------------------------------------------------------------------------------------------------------------------------------------------------------------------------------------------------------------------------------------------------------------------------------------------------------------------------------------------------------------------------------------------------------------------------------------------------------------------------------------------------------------------------------------------------------------------------------------------------------------------------------------------------------------------------------------------------------------------------------------------------------------------------------------------------------------------------------------------------------------------------------------------------------------------------------------------------------------------------------------------------------------------------------------------------------------------------------------------------------------------------------------------------------------------------------------------------------------------------------------------------------------------------------------------------------------------------------------------------------------------------------------------------------------------------------------------------------------------------------------------------------------------------------------------------------------------------------------------------------------------------------------------------------------------------------------|------|---------|------|--|---------|--|-----------------------------------------------------------------------------------------------------------------------------------------------------------|--|--|--|--|--|--|--|
|     |      |      |     |       |       |     |       |       |                |                                                    |    |                                                                                                                                                                                                                                                                                                                                                                                                                                                                                                                                                                                                                                                                                                                                                                                                                                                                                                                                                                                                                                                                                                                                                                                                                                                                                                                                                                                                                                                                                                                                                                                                                                                                                                                                                                                                                                                                                                                                                                                                                                                                                                                    |      |         |      |  |         |  | retrograde transport, endosome to Golgi; negative regulation of phosphatidylinositol 3-kinase activity; retrograde transport, endosome to plasma membrane |  |  |  |  |  |  |  |
| 89  | 115  | 83   | 19  | 337   | 96    | 166 | 121   | 229   | <b>CALB2</b>   | calbindin 2                                        | 16 | regulation of cytosolic calcium ion concentration; regulation of presynaptic cytosolic calcium ion concentration; regulation of long-term synaptic potentiation                                                                                                                                                                                                                                                                                                                                                                                                                                                                                                                                                                                                                                                                                                                                                                                                                                                                                                                                                                                                                                                                                                                                                                                                                                                                                                                                                                                                                                                                                                                                                                                                                                                                                                                                                                                                                                                                                                                                                    | 3,77 | 1,8E-03 | 2,04 |  | 8,0E-01 |  |                                                                                                                                                           |  |  |  |  |  |  |  |
| 5   | 5    | 4    | 51  | 639   | 174   | 10  | 11    | 6     | <b>CLDN5</b>   | claudin 5                                          | 22 | positive regulation of gene expression; negative regulation of gene expression; myelination; response to ethanol; tight junction assembly; negative regulation of cell migration; cell adhesion; bicellular tight junction assembly; outflow tract morphogenesis; cell-cell junction assembly; transforming growth factor beta receptor signaling pathway; learning; positive regulation of cell population proliferation; calcium-independent cell-cell adhesion via plasma membrane cell-adhesion molecules; negative regulation of angiogenesis; positive regulation of protein binding; maintenance of blood-brain barrier; negative regulation of vascular permeability; roof of mouth development; face morphogenesis; positive regulation of establishment of endothelial barrier; positive regulation of bicellular tight junction assembly; establishment of blood-retinal barrier; regulation of bicellular tight junction assembly                                                                                                                                                                                                                                                                                                                                                                                                                                                                                                                                                                                                                                                                                                                                                                                                                                                                                                                                                                                                                                                                                                                                                                      | 3,58 | 2,1E-03 | 1,70 |  | 9,4E-01 |  |                                                                                                                                                           |  |  |  |  |  |  |  |
| 291 | 292  | 319  | 747 | 1764  | 1117  | 608 | 670   | 527   | <b>PLK3</b>    | polo like kinase 3                                 | 1  | protein phosphorylation; cell cycle; phosphorylation; negative regulation of apoptotic process; apoptotic process; cellular response to DNA damage stimulus; negative regulation of transcription by RNA polymerase II; DNA damage response, signal transduction by p53 class mediator resulting in cell cycle arrest; mitotic cell cycle; regulation of cell division; regulation of signal transduction by p53 class mediator; regulation of cytokinesis; G1/S transition of mitotic cell cycle; response to osmotic stress; positive regulation of intracellular protein transport; response to radiation; mitotic cell cycle checkpoint; G2/M transition of mitotic cell cycle; protein kinase B signaling; response to reactive oxygen species; Golgi disassembly; cytoplasmic microtubule organization; mitotic G1/S transition checkpoint; positive regulation of proteasomal ubiquitin-dependent protein catabolic process involved in cellular response to hypoxia; endomitotic cell cycle; positive regulation of chaperone-mediated autophagy                                                                                                                                                                                                                                                                                                                                                                                                                                                                                                                                                                                                                                                                                                                                                                                                                                                                                                                                                                                                                                                           | 1,24 | 3,3E-03 | 0,58 |  | 9,8E-01 |  |                                                                                                                                                           |  |  |  |  |  |  |  |
| 6   | 14   | 17   | 5   | 59    | 58    | 2   | 22    | 20    | <b>PCDH8</b>   | protocadherin beta 8                               | 5  | homophilic cell adhesion via plasma membrane adhesion molecules; cell adhesion                                                                                                                                                                                                                                                                                                                                                                                                                                                                                                                                                                                                                                                                                                                                                                                                                                                                                                                                                                                                                                                                                                                                                                                                                                                                                                                                                                                                                                                                                                                                                                                                                                                                                                                                                                                                                                                                                                                                                                                                                                     | 3,26 | 4,0E-03 | 3,20 |  | 2,8E-02 |  |                                                                                                                                                           |  |  |  |  |  |  |  |
| 20  | 90   | 92   | 105 | 408   | 253   | 515 | 1063  | 892   | <b>SLC8A1</b>  | solute carrier family 8 member A1                  | 2  | transmembrane transport; calcium ion transport; cell communication; regulation of cardiac muscle contraction by regulation of the release of sequestered calcium ion; negative regulation of protein serine/threonine kinase activity; cellular response to reactive oxygen species; regulation of heart rate; ion transport; sodium ion transport; calcium ion transmembrane transport; sodium ion transmembrane transport; calcium ion import across plasma membrane; positive regulation of bone mineralization; muscle contraction; regulation of cardiac conduction; regulation of cell communication by electrical coupling; cardiac muscle contraction; cellular response to caffeine; calcium ion import; response to muscle stretch; calcium ion homeostasis; cellular calcium ion homeostasis; membrane depolarization during cardiac muscle cell action potential; cellular sodium ion homeostasis; sodium ion export across plasma membrane; relaxation of cardiac muscle; cell communication by electrical coupling involved in cardiac conduction; regulation of cardiac muscle contraction by calcium ion signaling; regulation of gene expression; regulation of the force of heart contraction; sodium ion import across plasma membrane; positive regulation of the force of heart contraction; vascular associated smooth muscle contraction; metal ion transport; relaxation of smooth muscle; negative regulation of cytosolic calcium ion concentration; cardiac muscle cell development; cytosolic calcium ion transport; calcium ion transport into cytosol; regulation of postsynaptic cytosolic calcium ion concentration; response to hypoxia; regulation of sodium ion transport; positive regulation of cytosolic calcium ion concentration; response to nutrient; response to glucose; positive regulation of fibroblast migration; telencephalon development; response to ATP; response to immobilization stress; response to drug; response to hydrogen peroxide; regulation of calcium ion transport; cellular response to cAMP; cellular response to hypoxia; calcium ion export | 1,92 | 4,1E-03 | 1,23 |  | 6,1E-01 |  |                                                                                                                                                           |  |  |  |  |  |  |  |
| 106 | 164  | 117  | 17  | 131   | 55    | 20  | 19    | 25    | <b>TESC</b>    | tescalcin                                          | 12 | protein transport; cell differentiation; negative regulation of catalytic activity; positive regulation of transcription, DNA-templated; negative regulation of protein kinase activity; protein stabilization; positive regulation of gene expression; negative regulation of cell population proliferation; protein maturation; cellular response to retinoic acid; regulation of cell adhesion mediated by integrin; protein localization to plasma membrane; positive regulation of sodium:proton antiporter activity; positive regulation of megakaryocyte differentiation; positive regulation of granulocyte differentiation                                                                                                                                                                                                                                                                                                                                                                                                                                                                                                                                                                                                                                                                                                                                                                                                                                                                                                                                                                                                                                                                                                                                                                                                                                                                                                                                                                                                                                                                                | 2,77 | 4,4E-03 | 1,53 |  | 8,2E-01 |  |                                                                                                                                                           |  |  |  |  |  |  |  |
| 808 | 3610 | 3892 | 7   | 156   | 63    | 46  | 24    | 51    | <b>APELA</b>   | apelin receptor early endogenous ligand            | 4  | multicellular organism development; cell differentiation; angiogenesis; heart development; positive regulation of ERK1 and ERK2 cascade; positive regulation of angiogenesis; vasculogenesis; gastrulation; endoderm development; mesoderm migration involved in gastrulation; adult heart development; embryonic heart tube development; positive regulation of heart contraction; apelin receptor signaling pathway; placenta blood vessel development; coronary vasculature development; mesendoderm migration; cell migration involved in mesendoderm migration; positive regulation of trophoblast cell migration; positive regulation of blood vessel endothelial cell proliferation involved in sprouting angiogenesis; positive regulation of G protein-coupled receptor internalization                                                                                                                                                                                                                                                                                                                                                                                                                                                                                                                                                                                                                                                                                                                                                                                                                                                                                                                                                                                                                                                                                                                                                                                                                                                                                                                   | 3,72 | 5,4E-03 | 2,52 |  | 5,4E-01 |  |                                                                                                                                                           |  |  |  |  |  |  |  |
| 14  | 23   | 38   | 54  | 1074  | 203   | 2   | 45    | 22    | <b>OTX1</b>    | orthodenticle homeobox 1                           | 2  | regulation of transcription, DNA-templated; multicellular organism development; positive regulation of transcription by RNA polymerase II; regulation of transcription by RNA polymerase II; anterior/posterior pattern specification; metencephalon development; forebrain development; midbrain development; inner ear morphogenesis; diencephalon morphogenesis                                                                                                                                                                                                                                                                                                                                                                                                                                                                                                                                                                                                                                                                                                                                                                                                                                                                                                                                                                                                                                                                                                                                                                                                                                                                                                                                                                                                                                                                                                                                                                                                                                                                                                                                                 | 4,09 | 5,4E-03 | 1,74 |  | 1,0E+00 |  |                                                                                                                                                           |  |  |  |  |  |  |  |
| 7   | 19   | 20   | 9   | 156   | 42    | 2   | 8     | 27    | <b>CDH15</b>   | cadherin 15                                        | 16 | homophilic cell adhesion via plasma membrane adhesion molecules; cell adhesion; cell-cell adhesion via plasma-membrane adhesion molecules                                                                                                                                                                                                                                                                                                                                                                                                                                                                                                                                                                                                                                                                                                                                                                                                                                                                                                                                                                                                                                                                                                                                                                                                                                                                                                                                                                                                                                                                                                                                                                                                                                                                                                                                                                                                                                                                                                                                                                          | 3,86 | 6,5E-03 | 2,01 |  | 9,2E-01 |  |                                                                                                                                                           |  |  |  |  |  |  |  |
| 65  | 136  | 120  | 31  | 312   | 152   | 17  | 44    | 44    | <b>ARC</b>     | activity regulated cytoskeleton associated protein | 8  | mRNA transport; multicellular organism development; endocytosis; cytoskeleton organization; cell migration; protein homooligomerization; regulation of cell morphogenesis; long-term memory; regulation of long-term synaptic potentiation; regulation of neuronal synaptic plasticity; modulation of chemical synaptic transmission; long-term synaptic potentiation; endoderm development; learning; anterior/posterior pattern specification; dendritic spine morphogenesis; regulation of dendritic spine morphogenesis; regulation of postsynaptic neurotransmitter receptor internalization; vesicle-mediated intercellular transport; regulation of long-term synaptic depression; positive regulation of AMPA receptor activity                                                                                                                                                                                                                                                                                                                                                                                                                                                                                                                                                                                                                                                                                                                                                                                                                                                                                                                                                                                                                                                                                                                                                                                                                                                                                                                                                                            | 3,12 | 8,0E-03 | 2,10 |  | 6,1E-01 |  |                                                                                                                                                           |  |  |  |  |  |  |  |
| 909 | 861  | 1004 | 115 | 442   | 422   | 457 | 616   | 601   | <b>KHNYN</b>   | KH and NYN domain containing                       | 14 | RNA phosphodiester bond hydrolysis, endonucleolytic                                                                                                                                                                                                                                                                                                                                                                                                                                                                                                                                                                                                                                                                                                                                                                                                                                                                                                                                                                                                                                                                                                                                                                                                                                                                                                                                                                                                                                                                                                                                                                                                                                                                                                                                                                                                                                                                                                                                                                                                                                                                | 1,87 | 9,5E-03 | 1,81 |  | 7,1E-02 |  |                                                                                                                                                           |  |  |  |  |  |  |  |
| 18  | 41   | 26   | 97  | 862   | 165   | 83  | 232   | 158   | <b>C4orf48</b> | chromosome 4 open reading frame 48                 | 4  |                                                                                                                                                                                                                                                                                                                                                                                                                                                                                                                                                                                                                                                                                                                                                                                                                                                                                                                                                                                                                                                                                                                                                                                                                                                                                                                                                                                                                                                                                                                                                                                                                                                                                                                                                                                                                                                                                                                                                                                                                                                                                                                    | 3,04 | 9,5E-03 | 0,72 |  | 1,0E+00 |  |                                                                                                                                                           |  |  |  |  |  |  |  |
| 20  | 2624 | 2895 | 20  | 37489 | 38283 | 25  | 15558 | 15743 | <b>NNAT</b>    | neuronatin                                         | 20 | brain development; multicellular organism development; positive regulation of insulin secretion; protein lipoylation                                                                                                                                                                                                                                                                                                                                                                                                                                                                                                                                                                                                                                                                                                                                                                                                                                                                                                                                                                                                                                                                                                                                                                                                                                                                                                                                                                                                                                                                                                                                                                                                                                                                                                                                                                                                                                                                                                                                                                                               | 5,42 | 1,1E-02 | 5,23 |  | 5,9E-02 |  |                                                                                                                                                           |  |  |  |  |  |  |  |

|     |     |     |      |      |      |      |     |     |                 |                                                            |    |                                                                                                                                                                                                                                                                                                                                                                                                                                                                                                                                                                                                                                                                                                                                                                                                                                                                                                                                                                                                                                                                        |      |         |      |         |
|-----|-----|-----|------|------|------|------|-----|-----|-----------------|------------------------------------------------------------|----|------------------------------------------------------------------------------------------------------------------------------------------------------------------------------------------------------------------------------------------------------------------------------------------------------------------------------------------------------------------------------------------------------------------------------------------------------------------------------------------------------------------------------------------------------------------------------------------------------------------------------------------------------------------------------------------------------------------------------------------------------------------------------------------------------------------------------------------------------------------------------------------------------------------------------------------------------------------------------------------------------------------------------------------------------------------------|------|---------|------|---------|
| 81  | 386 | 341 | 3    | 118  | 49   | 9    | 117 | 71  | <b>TXNRD2</b>   | thioredoxin reductase 2                                    | 22 | oxidation-reduction process; cell redox homeostasis; cellular oxidant detoxification; cellular response to oxidative stress; response to oxygen radical                                                                                                                                                                                                                                                                                                                                                                                                                                                                                                                                                                                                                                                                                                                                                                                                                                                                                                                | 4,22 | 1,2E-02 | 3,07 | 5,1E-01 |
| 97  | 122 | 131 | 46   | 115  | 71   | 177  | 210 | 181 | <b>HBEFG</b>    | heparin binding EGF like growth factor                     | 5  | positive regulation of protein kinase B signaling; positive regulation of cell migration; MAPK cascade; signal transduction; membrane organization; positive regulation of cell population proliferation; cell chemotaxis; ERBB2 signaling pathway; regulation of cell motility; muscle organ development; epidermal growth factor receptor signaling pathway; negative regulation of epidermal growth factor receptor signaling pathway; positive regulation of epidermal growth factor-activated receptor activity; positive regulation of wound healing; regulation of heart contraction; cell migration; positive regulation of cell growth; wound healing, spreading of epidermal cells; positive regulation of smooth muscle cell proliferation; positive regulation of peptidyl-tyrosine phosphorylation; negative regulation of elastin biosynthetic process; positive regulation of keratinocyte migration                                                                                                                                                    | 1,30 | 1,5E-02 | 0,61 | 1,0E+00 |
| 31  | 92  | 85  | 30   | 133  | 157  | 12   | 91  | 94  | <b>PCDHGA10</b> | protocadherin gamma subfamily A, 10                        | 5  | homophilic cell adhesion via plasma membrane adhesion molecules; cell adhesion                                                                                                                                                                                                                                                                                                                                                                                                                                                                                                                                                                                                                                                                                                                                                                                                                                                                                                                                                                                         | 2,09 | 1,7E-02 | 2,30 | 2,8E-02 |
| 210 | 226 | 260 | 230  | 1292 | 364  | 46   | 57  | 76  | <b>CCDC88B</b>  | coiled-coil domain containing 88B                          | 11 | cytoskeleton-dependent intracellular transport; positive regulation of cytokine production; cytoplasmic microtubule organization; positive regulation of T cell proliferation; defense response to protozoan; positive regulation of T cell activation                                                                                                                                                                                                                                                                                                                                                                                                                                                                                                                                                                                                                                                                                                                                                                                                                 | 2,44 | 1,7E-02 | 0,64 | 1,0E+00 |
| 24  | 43  | 37  | 10   | 37   | 27   | 15   | 37  | 41  | <b>PEX11G</b>   | peroxisomal biogenesis factor 11 gamma                     | 19 | peroxisome fission; regulation of peroxisome size                                                                                                                                                                                                                                                                                                                                                                                                                                                                                                                                                                                                                                                                                                                                                                                                                                                                                                                                                                                                                      | 1,81 | 1,8E-02 | 1,34 | 5,5E-01 |
| 9   | 25  | 26  | 34   | 381  | 133  | 14   | 29  | 21  | <b>SUSD2</b>    | sushi domain containing 2                                  | 22 | negative regulation of cell division; negative regulation of cell cycle G1/S phase transition                                                                                                                                                                                                                                                                                                                                                                                                                                                                                                                                                                                                                                                                                                                                                                                                                                                                                                                                                                          | 3,32 | 1,8E-02 | 1,82 | 9,5E-01 |
| 94  | 149 | 302 | 1849 | 8242 | 4072 | 432  | 438 | 464 | <b>DLL3</b>     | delta like canonical Notch ligand 3                        | 19 | multicellular organism development; cell differentiation; Notch signaling pathway; skeletal system development; somitogenesis; compartment pattern specification; tissue development; paraxial mesoderm development; negative regulation of neurogenesis                                                                                                                                                                                                                                                                                                                                                                                                                                                                                                                                                                                                                                                                                                                                                                                                               | 2,16 | 2,0E-02 | 1,13 | 9,9E-01 |
| 220 | 228 | 255 | 818  | 1999 | 1185 | 319  | 379 | 345 | <b>GADD45A</b>  | growth arrest and DNA damage inducible alpha               | 1  | regulation of cell cycle; cell cycle; cellular response to DNA damage stimulus; cell cycle arrest; DNA damage response, signal transduction by p53 class mediator resulting in cell cycle arrest; positive regulation of apoptotic process; cellular response to mechanical stimulus; apoptotic process; positive regulation of JNK cascade; DNA repair; positive regulation of p38MAPK cascade; regulation of cyclin-dependent protein serine/threonine kinase activity; activation of MAPKK activity; negative regulation of transcription by RNA polymerase II; positive regulation of reactive oxygen species metabolic process; signal transduction in response to DNA damage; cellular response to ionizing radiation; negative regulation of blood vessel endothelial cell migration; negative regulation of protein kinase activity; centrosome cycle; negative regulation of angiogenesis; negative regulation of peptidyl-serine phosphorylation of STAT protein; mitotic cell cycle arrest; negative regulation of protein serine/threonine kinase activity | 1,29 | 2,1E-02 | 0,53 | 1,0E+00 |
| 124 | 163 | 185 | 24   | 183  | 145  | 155  | 166 | 143 | <b>PSTPIP2</b>  | proline-serine-threonine phosphatase interacting protein 2 | 18 | cytoskeleton organization; cell migration; actin filament polymerization                                                                                                                                                                                                                                                                                                                                                                                                                                                                                                                                                                                                                                                                                                                                                                                                                                                                                                                                                                                               | 2,72 | 2,1E-02 | 2,39 | 2,6E-01 |
| 142 | 159 | 182 | 1163 | 4388 | 2280 | 623  | 947 | 938 | <b>SEPTIN4</b>  | septin 4                                                   | 17 | cell cycle; apoptotic process; cell division; cell differentiation; spermatogenesis; positive regulation of apoptotic process; positive regulation of protein ubiquitination; cellular protein localization; cytoskeleton-dependent cytokinesis; regulation of apoptotic process; positive regulation of intrinsic apoptotic signaling pathway; regulation of exocytosis                                                                                                                                                                                                                                                                                                                                                                                                                                                                                                                                                                                                                                                                                               | 1,90 | 2,1E-02 | 0,96 | 1,0E+00 |
| 449 | 458 | 571 | 746  | 1641 | 1213 | 388  | 299 | 336 | <b>TOB1</b>     | transducer of ERBB2, 1                                     | 17 | negative regulation of cell population proliferation; negative regulation of translation; negative regulation of nucleic acid-templated transcription; regulation of gene expression; positive regulation of nuclear-transcribed mRNA poly(A) tail shortening; positive regulation of nuclear-transcribed mRNA catabolic process, deadenylation-dependent decay; negative regulation of BMP signaling pathway; negative regulation of osteoblast differentiation; negative regulation of nuclear-transcribed mRNA poly(A) tail shortening; regulation of SMAD protein signal transduction                                                                                                                                                                                                                                                                                                                                                                                                                                                                              | 1,13 | 2,3E-02 | 0,70 | 8,6E-01 |
| 38  | 48  | 47  | 69   | 203  | 100  | 70   | 125 | 94  | <b>PBX4</b>     | PBX homeobox 4                                             | 19 | regulation of transcription, DNA-templated; positive regulation of transcription, DNA-templated; regulation of transcription by RNA polymerase II; animal organ morphogenesis; eye development; brain development; embryonic organ development; neuron development                                                                                                                                                                                                                                                                                                                                                                                                                                                                                                                                                                                                                                                                                                                                                                                                     | 1,54 | 2,6E-02 | 0,52 | 1,0E+00 |
| 58  | 71  | 44  | 57   | 202  | 71   | 124  | 145 | 119 | <b>ADGRB1</b>   | adhesion G protein-coupled receptor B1                     | 8  | G protein-coupled receptor signaling pathway; cell surface receptor signaling pathway; negative regulation of angiogenesis; muscle organ development; signal transduction; immune system process; innate immune response; nervous system development; phagocytosis; defense response to Gram-negative bacterium; cell adhesion; negative regulation of endothelial cell migration; phagocytosis, recognition; phagocytosis, engulfment; adenylylate cyclase-activating G protein-coupled receptor signaling pathway; axonogenesis; peripheral nervous system development; negative regulation of cell population proliferation; negative regulation of protein ubiquitination; negative regulation of protein catabolic process; apoptotic cell clearance; engulfment of apoptotic cell; regulation of synaptic plasticity; positive regulation of synapse assembly; positive regulation of myoblast fusion; positive regulation of reactive oxygen species biosynthetic process                                                                                       | 1,77 | 2,6E-02 | 0,29 | 1,0E+00 |
| 118 | 275 | 186 | 68   | 350  | 119  | 63   | 132 | 79  | <b>RTN4R</b>    | reticulon 4 receptor                                       | 22 | positive regulation of GTPase activity; negative regulation of neuron projection development; negative regulation of axon regeneration; cell surface receptor signaling pathway; positive regulation of Rho protein signal transduction; negative regulation of axonogenesis; negative regulation of axon extension; corpus callosum development; neuronal signal transduction; axonogenesis                                                                                                                                                                                                                                                                                                                                                                                                                                                                                                                                                                                                                                                                           | 2,27 | 2,6E-02 | 0,75 | 1,0E+00 |
| 67  | 74  | 74  | 32   | 80   | 38   | 20   | 32  | 27  | <b>TBC1D2</b>   | TBC1 domain family member 2                                | 9  | intracellular protein transport; activation of GTPase activity; positive regulation of GTPase activity                                                                                                                                                                                                                                                                                                                                                                                                                                                                                                                                                                                                                                                                                                                                                                                                                                                                                                                                                                 | 1,30 | 2,8E-02 | 0,23 | 1,0E+00 |
| 56  | 126 | 86  | 40   | 320  | 45   | 26   | 39  | 42  | <b>CCDC85B</b>  | coiled-coil domain containing 85B                          | 11 | cell differentiation; viral process; regulation of growth; negative regulation of cell growth; negative regulation of transcription, DNA-templated; negative regulation of fat cell differentiation                                                                                                                                                                                                                                                                                                                                                                                                                                                                                                                                                                                                                                                                                                                                                                                                                                                                    | 2,85 | 2,9E-02 | 0,14 | 1,0E+00 |
| 379 | 431 | 442 | 735  | 2249 | 1694 | 1081 | 654 | 571 | <b>PRSS23</b>   | serine protease 23                                         | 11 | proteolysis; cellular protein metabolic process; post-translational protein modification                                                                                                                                                                                                                                                                                                                                                                                                                                                                                                                                                                                                                                                                                                                                                                                                                                                                                                                                                                               | 1,59 | 3,3E-02 | 1,18 | 6,5E-01 |
| 303 | 598 | 485 | 491  | 1643 | 881  | 513  | 867 | 842 | <b>ZFR2</b>     | zinc finger RNA binding protein 2                          | 19 |                                                                                                                                                                                                                                                                                                                                                                                                                                                                                                                                                                                                                                                                                                                                                                                                                                                                                                                                                                                                                                                                        | 1,71 | 4,0E-02 | 0,82 | 1,0E+00 |
| 1   | 3   | 5   | 6    | 63   | 20   | 6    | 2   | 2   | <b>MYL4</b>     | myosin light chain 4                                       | 17 | cardiac muscle contraction; muscle filament sliding; positive regulation of ATPase activity; regulation of the force of heart contraction                                                                                                                                                                                                                                                                                                                                                                                                                                                                                                                                                                                                                                                                                                                                                                                                                                                                                                                              | 3,34 | 4,0E-02 | 1,69 | 1,0E+00 |
| 347 | 674 | 424 | 239  | 1561 | 522  | 135  | 249 | 179 | <b>ELN</b>      | elastin                                                    | 7  | outflow tract morphogenesis; extracellular matrix organization; animal organ morphogenesis; aortic valve morphogenesis; respiratory gaseous exchange by respiratory system; blood circulation; regulation of smooth muscle cell proliferation; skeletal muscle tissue development; regulation of actin filament polymerization; stress fiber assembly                                                                                                                                                                                                                                                                                                                                                                                                                                                                                                                                                                                                                                                                                                                  | 2,58 | 4,0E-02 | 1,04 | 1,0E+00 |

|      |      |      |      |      |      |      |      |      |          |                                                          |    |                                                                                                                                                                                                                                                                                                                                                                                                                                                                                                                                                                                                                                                                                                                                                                                                                                                                                                                                                                                                                                                                                                                                                                                                                                               |      |         |       |         |
|------|------|------|------|------|------|------|------|------|----------|----------------------------------------------------------|----|-----------------------------------------------------------------------------------------------------------------------------------------------------------------------------------------------------------------------------------------------------------------------------------------------------------------------------------------------------------------------------------------------------------------------------------------------------------------------------------------------------------------------------------------------------------------------------------------------------------------------------------------------------------------------------------------------------------------------------------------------------------------------------------------------------------------------------------------------------------------------------------------------------------------------------------------------------------------------------------------------------------------------------------------------------------------------------------------------------------------------------------------------------------------------------------------------------------------------------------------------|------|---------|-------|---------|
| 215  | 264  | 235  | 2692 | 6727 | 4441 | 1012 | 1428 | 1277 | DISP3    | dispatched RND transporter family member 3               | 1  | lipid metabolic process; cell differentiation; steroid metabolic process; cholesterol metabolic process; smoothened signaling pathway; positive regulation of neural precursor cell proliferation; negative regulation of neuron differentiation; cholesterol homeostasis; regulation of lipid transport; positive regulation of lipid metabolic process                                                                                                                                                                                                                                                                                                                                                                                                                                                                                                                                                                                                                                                                                                                                                                                                                                                                                      | 1,33 | 4,1E-02 | 0,72  | 1,0E+00 |
| 75   | 149  | 113  | 45   | 218  | 77   | 73   | 91   | 98   | TMEM160  | transmembrane protein 160                                | 19 |                                                                                                                                                                                                                                                                                                                                                                                                                                                                                                                                                                                                                                                                                                                                                                                                                                                                                                                                                                                                                                                                                                                                                                                                                                               | 2,18 | 4,1E-02 | 0,72  | 1,0E+00 |
| 34   | 98   | 77   | 136  | 599  | 164  | 71   | 157  | 105  | ANTKMT   | adenine nucleotide translocase lysine methyltransferase  | 16 | methylation; peptidyl-lysine methylation; peptidyl-lysine trimethylation; positive regulation of proton-transporting ATP synthase activity, rotational mechanism; regulation of mitochondrial ATP synthesis coupled proton transport                                                                                                                                                                                                                                                                                                                                                                                                                                                                                                                                                                                                                                                                                                                                                                                                                                                                                                                                                                                                          | 2,09 | 4,3E-02 | 0,26  | 1,0E+00 |
| 12   | 9    | 15   | 33   | 198  | 90   | 59   | 48   | 26   | PLEKHD1  | pleckstrin homology and coiled-coil domain containing D1 | 14 |                                                                                                                                                                                                                                                                                                                                                                                                                                                                                                                                                                                                                                                                                                                                                                                                                                                                                                                                                                                                                                                                                                                                                                                                                                               | 2,51 | 4,6E-02 | 1,38  | 1,0E+00 |
| 1489 | 740  | 646  | 630  | 3086 | 1508 | 1557 | 933  | 817  | HES6     | hes family bHLH transcription factor 6                   | 2  | regulation of transcription, DNA-templated; negative regulation of DNA-binding transcription factor activity; multicellular organism development; cell differentiation; regulation of transcription by RNA polymerase II; anterior/posterior pattern specification; regulation of neurogenesis; negative regulation of transcription by RNA polymerase II; nervous system development                                                                                                                                                                                                                                                                                                                                                                                                                                                                                                                                                                                                                                                                                                                                                                                                                                                         | 2,20 | 4,8E-02 | 1,19  | 1,0E+00 |
| 417  | 305  | 314  | 184  | 764  | 350  | 256  | 228  | 224  | LTBP3    | latent transforming growth factor beta binding protein 3 | 11 | positive regulation of mesenchymal stem cell differentiation; elastic fiber assembly; transforming growth factor beta activation; positive regulation of mesenchymal stem cell proliferation; skeletal system development; transforming growth factor beta receptor signaling pathway; negative regulation of bone mineralization; negative regulation of chondrocyte differentiation; positive regulation of bone resorption; bone remodeling; bone morphogenesis; lung sacculle development                                                                                                                                                                                                                                                                                                                                                                                                                                                                                                                                                                                                                                                                                                                                                 | 1,99 | 4,8E-02 | 0,88  | 1,0E+00 |
| 5897 | 6188 | 5744 | 1884 | 4484 | 3851 | 2652 | 4023 | 3034 | CLIC1    | chloride intracellular channel 1                         | 6  | chloride transport; regulation of cell cycle; ion transport; ion transmembrane transport; regulation of ion transmembrane transport; signal transduction; chloride transmembrane transport; platelet aggregation; positive regulation of osteoblast differentiation; regulation of mitochondrial membrane potential                                                                                                                                                                                                                                                                                                                                                                                                                                                                                                                                                                                                                                                                                                                                                                                                                                                                                                                           | 1,23 | 5,3E-02 | 1,01  | 5,9E-01 |
| 328  | 1210 | 574  | 646  | 1364 | 1120 | 568  | 741  | 640  | ATF5     | activating transcription factor 5                        | 19 | regulation of transcription, DNA-templated; regulation of transcription by RNA polymerase II; negative regulation of apoptotic process; positive regulation of transcription, DNA-templated; fat cell differentiation; negative regulation of cell population proliferation; positive regulation of transcription by RNA polymerase II; negative regulation of transcription, DNA-templated; regulation of centrosome cycle; negative regulation of cell cycle G2/M phase transition; cerebellar granule cell precursor proliferation; circadian rhythm; post-embryonic development; regulation of gene expression; olfactory bulb interneuron differentiation; olfactory bulb interneuron development; olfactory lobe development; multicellular organism growth                                                                                                                                                                                                                                                                                                                                                                                                                                                                             | 1,07 | 5,4E-02 | 0,79  | 7,8E-01 |
| 541  | 576  | 433  | 23   | 161  | 72   | 23   | 104  | 84   | SLC22A31 | solute carrier family 22 member 31                       | 16 | transmembrane transport; ion transport                                                                                                                                                                                                                                                                                                                                                                                                                                                                                                                                                                                                                                                                                                                                                                                                                                                                                                                                                                                                                                                                                                                                                                                                        | 2,55 | 5,6E-02 | 1,45  | 1,0E+00 |
| 0    | 0    | 0    | 16   | 109  | 64   | 1    | 1    | 3    | AGBL1    | ATP/GTP binding protein like 1                           | 15 | proteolysis; protein side chain deglutamylation; C-terminal protein deglutamylation                                                                                                                                                                                                                                                                                                                                                                                                                                                                                                                                                                                                                                                                                                                                                                                                                                                                                                                                                                                                                                                                                                                                                           | 2,82 | 5,8E-02 | 1,97  | 8,2E-01 |
| 298  | 525  | 509  | 1431 | 6026 | 2888 | 988  | 1361 | 1236 | PDE2A    | phosphodiesterase 2A                                     | 11 | signal transduction; adenylate cyclase-inhibiting G protein-coupled receptor signaling pathway; negative regulation of transcription by RNA polymerase II; positive regulation of inflammatory response; G protein-coupled receptor signaling pathway; cellular response to mechanical stimulus; positive regulation of gene expression; heart valve development; ventricular septum development; aorta development; regulation of cGMP-mediated signaling; negative regulation of cGMP-mediated signaling; regulation of mitochondrion organization; cAMP-mediated signaling; cGMP-mediated signaling; cellular response to macrophage colony-stimulating factor stimulus; negative regulation of vascular permeability; positive regulation of vascular permeability; regulation of cAMP-mediated signaling; negative regulation of cAMP-mediated signaling; cGMP catabolic process; establishment of endothelial barrier; cellular response to cAMP; cellular response to cGMP; cellular response to transforming growth factor beta stimulus; cellular response to 2,3,7,8-tetrachlorodibenzodioxine; monocyte differentiation; cellular response to drug; cellular response to granulocyte macrophage colony-stimulating factor stimulus | 2,04 | 6,7E-02 | 0,98  | 1,0E+00 |
| 77   | 58   | 94   | 363  | 1704 | 640  | 166  | 142  | 132  | GADD45G  | growth arrest and DNA damage inducible gamma             | 9  | regulation of cell cycle; apoptotic process; multicellular organism development; cell differentiation; positive regulation of apoptotic process; positive regulation of cold-induced thermogenesis; positive regulation of JNK cascade; positive regulation of p38MAPK cascade; activation of MAPKKK activity                                                                                                                                                                                                                                                                                                                                                                                                                                                                                                                                                                                                                                                                                                                                                                                                                                                                                                                                 | 2,20 | 6,7E-02 | 0,80  | 1,0E+00 |
| 43   | 46   | 49   | 24   | 70   | 44   | 10   | 8    | 8    | CLCN1    | chloride voltage-gated channel 1                         | 7  | transmembrane transport; chloride transport; chloride transmembrane transport; ion transport; regulation of ion transmembrane transport; ion transmembrane transport; muscle contraction; neuronal action potential propagation                                                                                                                                                                                                                                                                                                                                                                                                                                                                                                                                                                                                                                                                                                                                                                                                                                                                                                                                                                                                               | 1,53 | 7,3E-02 | 0,86  | 1,0E+00 |
| 1418 | 2773 | 2640 | 218  | 455  | 344  | 295  | 427  | 442  | CBR1     | carbonyl reductase 1                                     | 21 | oxidation-reduction process; epithelial cell differentiation; cyclooxygenase pathway; drug metabolic process; vitamin K metabolic process                                                                                                                                                                                                                                                                                                                                                                                                                                                                                                                                                                                                                                                                                                                                                                                                                                                                                                                                                                                                                                                                                                     | 1,04 | 7,7E-02 | 0,64  | 9,8E-01 |
| 148  | 104  | 123  | 843  | 2328 | 1179 | 234  | 228  | 231  | FAM110A  | family with sequence similarity 110 member A             | 20 |                                                                                                                                                                                                                                                                                                                                                                                                                                                                                                                                                                                                                                                                                                                                                                                                                                                                                                                                                                                                                                                                                                                                                                                                                                               | 1,47 | 7,7E-02 | 0,49  | 1,0E+00 |
| 392  | 525  | 491  | 28   | 100  | 51   | 48   | 70   | 51   | EGFL7    | EGF like domain multiple 7                               | 9  | cell adhesion; multicellular organism development; cell differentiation; angiogenesis; anatomical structure development; blood vessel development; vasculogenesis; positive regulation of endothelial cell proliferation; negative regulation of Notch signaling pathway                                                                                                                                                                                                                                                                                                                                                                                                                                                                                                                                                                                                                                                                                                                                                                                                                                                                                                                                                                      | 1,76 | 7,9E-02 | 0,80  | 1,0E+00 |
| 268  | 478  | 464  | 55   | 223  | 74   | 40   | 63   | 56   | ADGRE5   | adhesion G protein-coupled receptor E5                   | 19 | G protein-coupled receptor signaling pathway; cell surface receptor signaling pathway; cell adhesion; signal transduction; neutrophil degranulation; inflammatory response; immune response; cell-cell signaling; adenylate cyclase-activating G protein-coupled receptor signaling pathway                                                                                                                                                                                                                                                                                                                                                                                                                                                                                                                                                                                                                                                                                                                                                                                                                                                                                                                                                   | 1,92 | 8,6E-02 | 0,38  | 1,0E+00 |
| 4    | 3    | 4    | 54   | 389  | 49   | 2    | 5    | 1    | LCNL1    | lipocalin like 1                                         | 9  |                                                                                                                                                                                                                                                                                                                                                                                                                                                                                                                                                                                                                                                                                                                                                                                                                                                                                                                                                                                                                                                                                                                                                                                                                                               | 2,88 | 9,4E-02 | -0,02 | 1,0E+00 |
| 4802 | 5234 | 5996 | 449  | 3425 | 3067 | 1416 | 492  | 439  | PDPN     | podoplanin                                               | 1  | negative regulation of apoptotic process; multicellular organism development; amino acid transmembrane transport; negative regulation of cell population proliferation; positive regulation of cell migration; Rho protein signal transduction; regulation of cell shape; cell-cell adhesion; platelet activation; positive regulation of epithelial to mesenchymal transition; wound healing, spreading of cells; positive regulation of cellular component movement; folic acid transport; positive regulation of extracellular matrix disassembly; cell morphogenesis; lung development; regulation of lamellipodium morphogenesis; lymphangiogenesis; lymph node development; actin-mediated cell contraction; regulation of substrate adhesion-dependent cell spreading; positive regulation of platelet aggregation; water transport; tube morphogenesis; response to hyperoxia; lymphatic endothelial cell fate commitment; regulation of myofibroblast contraction; invadopodium organization                                                                                                                                                                                                                                         | 2,65 | 9,5E-02 | 2,48  | 5,0E-01 |
| 2    | 427  | 451  | 4    | 538  | 707  | 5    | 286  | 468  | RPS4XP22 | ribosomal protein S4X pseudogene 22                      | 19 |                                                                                                                                                                                                                                                                                                                                                                                                                                                                                                                                                                                                                                                                                                                                                                                                                                                                                                                                                                                                                                                                                                                                                                                                                                               | 6,84 | 9,1E-27 | 7,22  | 1,8E-28 |

|     |     |     |     |      |      |     |      |      |            |                                                        |    |  |      |         |      |         |
|-----|-----|-----|-----|------|------|-----|------|------|------------|--------------------------------------------------------|----|--|------|---------|------|---------|
| 57  | 86  | 98  | 48  | 147  | 142  | 68  | 109  | 130  | ELOA-AS1   | ELOA antisense RNA 1                                   | 1  |  | 1,60 | 3,3E-07 | 1,55 | 1,8E-05 |
| 39  | 367 | 387 | 14  | 231  | 238  | 15  | 111  | 150  | RCN1P2     | reticulocalbin 1 pseudogene 2                          | 13 |  | 3,77 | 9,3E-06 | 3,79 | 1,0E-04 |
| 4   | 3   | 6   | 6   | 99   | 24   | 5   | 7    | 13   | LINC02293  | long intergenic non-protein coding RNA 2293            | 14 |  | 3,84 | 4,3E-04 | 1,80 | 8,6E-01 |
| 0   | 1   | 2   | 15  | 196  | 80   | 10  | 5    | 9    | AC025048.1 | novel transcript                                       | 17 |  | 3,64 | 4,3E-04 | 2,31 | 4,0E-01 |
| 217 | 561 | 532 | 452 | 1997 | 1150 | 252 | 914  | 704  | MUC20-OT1  | MUC20 overlapping transcript                           | 3  |  | 2,11 | 4,5E-04 | 1,32 | 4,7E-01 |
| 0   | 1   | 3   | 83  | 751  | 389  | 4   | 3    | 2    | AP003049.2 | novel transcript, antisense to C11orf87                | 11 |  | 3,21 | 1,2E-02 | 2,18 | 6,4E-01 |
| 32  | 35  | 29  | 13  | 127  | 23   | 11  | 9    | 4    | ESPNP      | espin pseudogene                                       | 1  |  | 3,13 | 1,5E-02 | 0,77 | 1,0E+00 |
| 131 | 199 | 207 | 210 | 603  | 525  | 483 | 1245 | 1220 | LINC00632  | long intergenic non-protein coding RNA 632             | X  |  | 1,50 | 1,8E-02 | 1,30 | 2,8E-01 |
| 72  | 135 | 203 | 189 | 496  | 381  | 208 | 361  | 357  | AL109918.1 | heterogeneous nuclear ribonucleoprotein A/B pseudogene | 6  |  | 1,38 | 2,2E-02 | 1,00 | 6,4E-01 |
| 17  | 46  | 50  | 45  | 212  | 165  | 465 | 602  | 558  | MAGI2-AS3  | MAGI2 antisense RNA 3                                  | 7  |  | 2,12 | 3,9E-02 | 1,76 | 5,0E-01 |
| 7   | 17  | 18  | 13  | 134  | 42   | 2   | 1    | 5    | AC020909.2 | novel transcript                                       | 19 |  | 3,20 | 3,9E-02 | 1,53 | 1,0E+00 |
| 43  | 166 | 124 | 210 | 1927 | 1392 | 34  | 441  | 160  | H19        | H19 imprinted maternally expressed transcript          | 11 |  | 3,04 | 4,1E-02 | 2,51 | 5,1E-01 |
| 81  | 167 | 153 | 134 | 504  | 332  | 60  | 123  | 129  | MIR570     | microRNA 570                                           | 3  |  | 1,87 | 4,5E-02 | 1,27 | 8,2E-01 |
| 260 | 293 | 217 | 340 | 885  | 494  | 224 | 325  | 281  | AP002026.1 | novel transcript, antisense to ADH4, ADH6 & ADH1A      | 4  |  | 1,37 | 4,6E-02 | 0,53 | 1,0E+00 |
| 48  | 49  | 54  | 53  | 114  | 109  | 54  | 62   | 61   | AC005229.4 | novel transcript, antisense to CUL1                    | 7  |  | 1,08 | 7,5E-02 | 1,02 | 4,3E-01 |
| 11  | 7   | 6   | 14  | 71   | 43   | 9   | 4    | 3    | LINC01686  | long intergenic non-protein coding RNA 1686            | 1  |  | 2,32 | 7,8E-02 | 1,57 | 9,1E-01 |

**DOWNREGULATED GENES**

| Normalized read counts |       |        |                    |       |        |                |       |        | GENE   | Description                                               | Chr | GO: Biological process                                                                                                                                                                                                                                                                                                                                                                                                                                                                                                                                                                                                          | Log <sub>2</sub> FC FRDA/CT | FDR     | Log <sub>2</sub> FC ISO CT/CT | FDR     |
|------------------------|-------|--------|--------------------|-------|--------|----------------|-------|--------|--------|-----------------------------------------------------------|-----|---------------------------------------------------------------------------------------------------------------------------------------------------------------------------------------------------------------------------------------------------------------------------------------------------------------------------------------------------------------------------------------------------------------------------------------------------------------------------------------------------------------------------------------------------------------------------------------------------------------------------------|-----------------------------|---------|-------------------------------|---------|
| iPSCs                  |       |        | Developing Neurons |       |        | Mature Neurons |       |        |        |                                                           |     |                                                                                                                                                                                                                                                                                                                                                                                                                                                                                                                                                                                                                                 |                             |         |                               |         |
| CT                     | FRDA  | ISO CT | CT                 | FRDA  | ISO CT | CT             | FRDA  | ISO CT |        |                                                           |     |                                                                                                                                                                                                                                                                                                                                                                                                                                                                                                                                                                                                                                 |                             |         |                               |         |
| 88                     | 64    | 65     | 348                | 56    | 65     | 255            | 84    | 102    | SAXO2  | stabilizer of axonemal microtubules 2                     | 15  | microtubule anchoring                                                                                                                                                                                                                                                                                                                                                                                                                                                                                                                                                                                                           | -2,61                       | 5,9E-13 | -2,38                         | 4,8E-08 |
| 19                     | 0     | 0      | 18                 | 0     | 0      | 11             | 0     | 0      | EIF3CL | eukaryotic translation initiation factor 3 subunit C like | 16  | translational initiation; formation of cytoplasmic translation initiation complex; cytoplasmic translational initiation; translation                                                                                                                                                                                                                                                                                                                                                                                                                                                                                            | -5,07                       | 9,7E-11 | -6,21                         | 5,8E-07 |
| 210                    | 100   | 85     | 196                | 90    | 120    | 236            | 103   | 128    | THNSL1 | threonine synthase like 1                                 | 10  |                                                                                                                                                                                                                                                                                                                                                                                                                                                                                                                                                                                                                                 | -1,11                       | 1,2E-03 | -0,70                         | 5,1E-01 |
| 669                    | 465   | 626    | 391                | 80    | 101    | 482            | 340   | 465    | SYT6   | synaptotagmin 6                                           | 1   | acrosome reaction; vesicle-mediated transport; regulation of dopamine secretion; calcium-ion regulated exocytosis; regulation of calcium ion-dependent exocytosis; calcium ion-regulated exocytosis of neurotransmitter; cellular response to calcium ion; acrosomal vesicle exocytosis; presynaptic dense core vesicle exocytosis                                                                                                                                                                                                                                                                                              | -2,24                       | 2,5E-03 | -1,90                         | 1,1E-01 |
| 27723                  | 30500 | 32082  | 21182              | 10009 | 10902  | 13127          | 14531 | 12828  | ITM2C  | integral membrane protein 2C                              | 2   | neuron differentiation; negative regulation of neuron projection development; negative regulation of amyloid precursor protein biosynthetic process; positive regulation of extrinsic apoptotic signaling pathway                                                                                                                                                                                                                                                                                                                                                                                                               | -1,08                       | 3,2E-03 | -0,95                         | 8,4E-02 |
| 1116                   | 1231  | 1546   | 1489               | 219   | 194    | 2944           | 3264  | 2273   | TSPAN2 | tetraspanin 2                                             | 1   | inflammatory response; brain development; astrocyte development; microglia development; myelination; oligodendrocyte differentiation; axon development                                                                                                                                                                                                                                                                                                                                                                                                                                                                          | -2,68                       | 5,6E-03 | -2,80                         | 2,0E-02 |
| 1934                   | 1318  | 1418   | 348                | 104   | 101    | 431            | 204   | 162    | GABRA5 | gamma-aminobutyric acid type A receptor subunit alpha5    | 15  | ion transport; chloride transport; gamma-aminobutyric acid signaling pathway; ion transmembrane transport; signal transduction; chemical synaptic transmission; regulation of membrane potential; nervous system process; chloride transmembrane transport; synaptic transmission, GABAergic; regulation of postsynaptic membrane potential; behavioral fear response; brain development; sensory perception of sound; associative learning; regulation of neuron apoptotic process; negative regulation of neuron apoptotic process; neuron development; inner ear receptor cell development; innervation; cochlea development | -1,72                       | 6,5E-03 | -1,75                         | 3,4E-02 |

|       |       |      |      |     |     |      |      |      |          |                                                               |    |                                                                                                                                                                                                                                                                                                                                                                                                                                                                                                                                                                                                                                                                                                                                                                                                                                                                                                                                                                                                                                                                                                                                                                                                                                                                                                                                                                                                                                                                                                                                                                                                                                                                                                                                                                                                                                                                                                                                                                                                                                                                                                                                                                                                                                                 |       |         |       |         |
|-------|-------|------|------|-----|-----|------|------|------|----------|---------------------------------------------------------------|----|-------------------------------------------------------------------------------------------------------------------------------------------------------------------------------------------------------------------------------------------------------------------------------------------------------------------------------------------------------------------------------------------------------------------------------------------------------------------------------------------------------------------------------------------------------------------------------------------------------------------------------------------------------------------------------------------------------------------------------------------------------------------------------------------------------------------------------------------------------------------------------------------------------------------------------------------------------------------------------------------------------------------------------------------------------------------------------------------------------------------------------------------------------------------------------------------------------------------------------------------------------------------------------------------------------------------------------------------------------------------------------------------------------------------------------------------------------------------------------------------------------------------------------------------------------------------------------------------------------------------------------------------------------------------------------------------------------------------------------------------------------------------------------------------------------------------------------------------------------------------------------------------------------------------------------------------------------------------------------------------------------------------------------------------------------------------------------------------------------------------------------------------------------------------------------------------------------------------------------------------------|-------|---------|-------|---------|
| 588   | 572   | 837  | 45   | 8   | 15  | 4    | 1    | 3    | COBL     | cordon-bleu WH2 repeat protein                                | 7  | digestive tract development; embryonic axis specification; neural tube closure; actin filament polymerization; somite specification; liver development; notochord development; floor plate development; collateral sprouting in absence of injury; actin filament network formation; positive regulation of dendrite development; actin cytoskeleton organization; positive regulation of ruffle assembly                                                                                                                                                                                                                                                                                                                                                                                                                                                                                                                                                                                                                                                                                                                                                                                                                                                                                                                                                                                                                                                                                                                                                                                                                                                                                                                                                                                                                                                                                                                                                                                                                                                                                                                                                                                                                                       | -2,41 | 7,9E-03 | -1,53 | 6,8E-01 |
| 2189  | 2598  | 2261 | 429  | 72  | 113 | 110  | 32   | 94   | TUBA4A   | tubulin alpha 4a                                              | 2  | microtubule-based process; microtubule cytoskeleton organization; mitotic cell cycle; G2/M transition of mitotic cell cycle; regulation of G2/M transition of mitotic cell cycle; ciliary basal body-plasma membrane docking; platelet degranulation; cytoskeleton organization                                                                                                                                                                                                                                                                                                                                                                                                                                                                                                                                                                                                                                                                                                                                                                                                                                                                                                                                                                                                                                                                                                                                                                                                                                                                                                                                                                                                                                                                                                                                                                                                                                                                                                                                                                                                                                                                                                                                                                 | -2,49 | 8,0E-03 | -1,84 | 4,6E-01 |
| 284   | 164   | 191  | 44   | 12  | 8   | 67   | 29   | 24   | STAG3    | stromal antigen 3                                             | 7  | cell cycle; chromosome segregation; meiotic cell cycle; sister chromatid cohesion; synaptonemal complex assembly; synapsis; protein localization to chromosome                                                                                                                                                                                                                                                                                                                                                                                                                                                                                                                                                                                                                                                                                                                                                                                                                                                                                                                                                                                                                                                                                                                                                                                                                                                                                                                                                                                                                                                                                                                                                                                                                                                                                                                                                                                                                                                                                                                                                                                                                                                                                  | -1,84 | 1,7E-02 | -2,34 | 1,1E-02 |
| 1     | 1     | 0    | 353  | 64  | 81  | 207  | 283  | 195  | GLRA1    | glycine receptor alpha 1                                      | 5  | ion transport; chloride transport; ion transmembrane transport; neuropeptide signaling pathway; signal transduction; excitatory postsynaptic potential; cellular response to amino acid stimulus; chemical synaptic transmission; regulation of membrane potential; nervous system process; chloride transmembrane transport; positive regulation of acrosome reaction; response to amino acid; synaptic transmission, glycinergic; cellular response to zinc ion; muscle contraction; startle response; negative regulation of transmission of nerve impulse; inhibitory postsynaptic potential; cellular response to ethanol; response to alcohol; action potential; regulation of respiratory gaseous exchange by nervous system process; anion transport; acrosome reaction; visual perception; adult walking behavior; regulation of respiratory gaseous exchange; neuromuscular process controlling posture; neuromuscular process; righting reflex                                                                                                                                                                                                                                                                                                                                                                                                                                                                                                                                                                                                                                                                                                                                                                                                                                                                                                                                                                                                                                                                                                                                                                                                                                                                                       | -2,30 | 1,8E-02 | -2,00 | 2,7E-01 |
| 31    | 14    | 28   | 166  | 31  | 26  | 129  | 51   | 65   | GRIN1    | glutamate ionotropic receptor NMDA type subunit 1             | 9  | ion transport; positive regulation of reactive oxygen species biosynthetic process; chemical synaptic transmission; regulation of membrane potential; positive regulation of transcription by RNA polymerase II; MAPK cascade; ephrin receptor signaling pathway; brain development; calcium-mediated signaling; regulation of synaptic plasticity; calcium ion transmembrane import into cytosol; excitatory chemical synaptic transmission; visual learning; protein heterotetramerization; ionotropic glutamate receptor signaling pathway; calcium ion homeostasis; response to ethanol; positive regulation of cysteine-type endopeptidase activity; regulation of NMDA receptor activity; cation transport; excitatory postsynaptic potential; positive regulation of excitatory postsynaptic potential; positive regulation of calcium ion transport into cytosol; propylene metabolic process; response to glycine; conditioned taste aversion; startle response; suckling behavior; response to amphetamine; calcium ion transport; cellular calcium ion homeostasis; learning or memory; learning; memory; long-term memory; associative learning; adult locomotory behavior; olfactory learning; regulation of cell communication; sensory perception of pain; pons maturation; cerebral cortex development; social behavior; synaptic transmission, glutamatergic; positive regulation of apoptotic process; response to morphine; regulation of neuron apoptotic process; negative regulation of neuron apoptotic process; regulation of respiratory gaseous exchange; regulation of neuronal synaptic plasticity; regulation of long-term neuronal synaptic plasticity; regulation of dendrite morphogenesis; regulation of axonogenesis; neuromuscular process; regulation of synapse assembly; prepulse inhibition; male mating behavior; protein localization to postsynaptic membrane; ion transmembrane transport                                                                                                                                                                                                                                                                                                            | -2,29 | 2,2E-02 | -2,53 | 3,9E-02 |
| 2     | 1     | 1    | 283  | 76  | 97  | 249  | 207  | 205  | GOLGA7B  | golgin A7 family member B                                     | 10 | protein targeting to membrane; peptidyl-L-cysteine S-palmitoylation                                                                                                                                                                                                                                                                                                                                                                                                                                                                                                                                                                                                                                                                                                                                                                                                                                                                                                                                                                                                                                                                                                                                                                                                                                                                                                                                                                                                                                                                                                                                                                                                                                                                                                                                                                                                                                                                                                                                                                                                                                                                                                                                                                             | -1,81 | 2,8E-02 | -1,47 | 5,0E-01 |
| 8433  | 8351  | 7939 | 75   | 28  | 39  | 156  | 30   | 47   | EPCAM    | epithelial cell adhesion molecule                             | 2  | ureteric bud development; negative regulation of apoptotic process; cell-cell adhesion via plasma-membrane adhesion molecules; positive regulation of cell motility; leukocyte migration; positive regulation of transcription by RNA polymerase II; stem cell differentiation; positive regulation of cell population proliferation; positive regulation of stem cell proliferation; signal transduction involved in regulation of gene expression; negative regulation of cell-cell adhesion mediated by cadherin                                                                                                                                                                                                                                                                                                                                                                                                                                                                                                                                                                                                                                                                                                                                                                                                                                                                                                                                                                                                                                                                                                                                                                                                                                                                                                                                                                                                                                                                                                                                                                                                                                                                                                                             | -1,43 | 3,1E-02 | -0,93 | 8,2E-01 |
| 1897  | 1552  | 1820 | 163  | 32  | 37  | 114  | 63   | 54   | KCNS3    | potassium voltage-gated channel modifier subfamily S member 3 | 2  | ion transport; transmembrane transport; potassium ion transport; protein homooligomerization; regulation of ion transmembrane transport; potassium ion transmembrane transport; regulation of insulin secretion; ion transmembrane transport                                                                                                                                                                                                                                                                                                                                                                                                                                                                                                                                                                                                                                                                                                                                                                                                                                                                                                                                                                                                                                                                                                                                                                                                                                                                                                                                                                                                                                                                                                                                                                                                                                                                                                                                                                                                                                                                                                                                                                                                    | -2,30 | 3,3E-02 | -2,04 | 3,5E-01 |
| 4304  | 6165  | 5752 | 322  | 120 | 171 | 268  | 143  | 231  | GPR176   | G protein-coupled receptor 176                                | 15 | G protein-coupled receptor signaling pathway; signal transduction; rhythmic process; circadian behavior; chemical synaptic transmission; adenylate cyclase-inhibiting G protein-coupled receptor signaling pathway                                                                                                                                                                                                                                                                                                                                                                                                                                                                                                                                                                                                                                                                                                                                                                                                                                                                                                                                                                                                                                                                                                                                                                                                                                                                                                                                                                                                                                                                                                                                                                                                                                                                                                                                                                                                                                                                                                                                                                                                                              | -1,42 | 4,0E-02 | -0,90 | 8,9E-01 |
| 2     | 2     | 4    | 97   | 17  | 36  | 50   | 33   | 47   | TCTE1    | t-complex-associated-testis-expressed 1                       | 6  | flagellated sperm motility                                                                                                                                                                                                                                                                                                                                                                                                                                                                                                                                                                                                                                                                                                                                                                                                                                                                                                                                                                                                                                                                                                                                                                                                                                                                                                                                                                                                                                                                                                                                                                                                                                                                                                                                                                                                                                                                                                                                                                                                                                                                                                                                                                                                                      | -2,37 | 4,5E-02 | -1,31 | 1,0E+00 |
| 10188 | 10035 | 9391 | 1603 | 613 | 799 | 3064 | 1699 | 1654 | KIF1C    | kinesin family member 1C                                      | 17 | microtubule-based movement; vesicle-mediated transport; cytoskeleton-dependent intracellular transport; retrograde vesicle-mediated transport, Golgi to endoplasmic reticulum; anterograde neuronal dense core vesicle transport; retrograde neuronal dense core vesicle transport                                                                                                                                                                                                                                                                                                                                                                                                                                                                                                                                                                                                                                                                                                                                                                                                                                                                                                                                                                                                                                                                                                                                                                                                                                                                                                                                                                                                                                                                                                                                                                                                                                                                                                                                                                                                                                                                                                                                                              | -1,38 | 4,5E-02 | -0,99 | 7,8E-01 |
| 5648  | 5579  | 5380 | 1526 | 513 | 432 | 1292 | 932  | 911  | FBLIM1   | filamin binding LIM protein 1                                 | 1  | cell adhesion; regulation of cell shape; cell-cell adhesion; regulation of integrin activation; cell junction assembly                                                                                                                                                                                                                                                                                                                                                                                                                                                                                                                                                                                                                                                                                                                                                                                                                                                                                                                                                                                                                                                                                                                                                                                                                                                                                                                                                                                                                                                                                                                                                                                                                                                                                                                                                                                                                                                                                                                                                                                                                                                                                                                          | -1,55 | 5,4E-02 | -1,78 | 7,8E-02 |
| 9     | 9     | 13   | 244  | 47  | 25  | 41   | 33   | 13   | DKK 1,00 | dickkopf WNT signaling pathway inhibitor 1                    | 10 | multicellular organism development; negative regulation of Wnt signaling pathway; positive regulation of gene expression; negative regulation of cardiac muscle cell differentiation; negative regulation of canonical Wnt signaling pathway; positive regulation of tau-protein kinase activity; negative regulation of pathway-restricted SMAD protein phosphorylation; negative regulation of apoptotic process; Wnt signaling pathway; negative regulation of signaling receptor activity; negative regulation of transcription by RNA polymerase II; cell morphogenesis involved in differentiation; endoderm formation; mesoderm formation; hair follicle development; endoderm development; learning or memory; negative regulation of neuron projection development; regulation of Wnt signaling pathway; negative regulation of ossification; embryonic limb morphogenesis; negative regulation of BMP signaling pathway; forebrain development; response to retinoic acid; regulation of synapse organization; regulation of synaptic transmission, glutamatergic; limb development; head morphogenesis; face morphogenesis; motor learning; positive regulation of heart induction by negative regulation of canonical Wnt signaling pathway; Wnt signaling pathway involved in somitogenesis; modulation of age-related behavioral decline; positive regulation of midbrain dopaminergic neuron differentiation; negative regulation of presynapse assembly; negative regulation of peptidyl-serine phosphorylation; positive regulation of neuron death; positive regulation of cell death; regulation of receptor internalization; negative regulation of protein binding; negative regulation of mesodermal cell fate specification; regulation of endodermal cell fate specification; positive regulation of JUN kinase activity; positive regulation of Wnt signaling pathway, calcium modulating pathway; synapse pruning; negative regulation of canonical Wnt signaling pathway involved in cardiac muscle cell fate commitment; regulation of dopaminergic neuron differentiation; negative regulation of Wnt-Frizzled-LRP5/6 complex assembly; positive regulation of Wnt signaling pathway, planar cell polarity pathway | -2,21 | 5,4E-02 | -3,08 | 9,7E-03 |
| 99    | 122   | 147  | 63   | 17  | 57  | 244  | 161  | 226  | OGFRL1   | opioid growth factor receptor like 1                          | 6  | opioid receptor signaling pathway                                                                                                                                                                                                                                                                                                                                                                                                                                                                                                                                                                                                                                                                                                                                                                                                                                                                                                                                                                                                                                                                                                                                                                                                                                                                                                                                                                                                                                                                                                                                                                                                                                                                                                                                                                                                                                                                                                                                                                                                                                                                                                                                                                                                               | -1,87 | 6,0E-02 | -0,14 | 1,0E+00 |

|       |      |      |       |      |      |       |      |      |            |                                                                      |    |                                                                                                                                                                                                                                                                                                                                                                                                                                                                                                                                                                                                                                                                                                                                                                                                                                                                                                                                                                                                                                              |       |          |       |         |
|-------|------|------|-------|------|------|-------|------|------|------------|----------------------------------------------------------------------|----|----------------------------------------------------------------------------------------------------------------------------------------------------------------------------------------------------------------------------------------------------------------------------------------------------------------------------------------------------------------------------------------------------------------------------------------------------------------------------------------------------------------------------------------------------------------------------------------------------------------------------------------------------------------------------------------------------------------------------------------------------------------------------------------------------------------------------------------------------------------------------------------------------------------------------------------------------------------------------------------------------------------------------------------------|-------|----------|-------|---------|
| 2109  | 2353 | 2101 | 2755  | 900  | 1988 | 3012  | 2409 | 2757 | TLN2       | talin 2                                                              | 15 | cell adhesion; obsolete cytoskeletal anchoring at plasma membrane; cytoskeleton organization; cell-cell adhesion; cell-cell junction assembly; endocytosis                                                                                                                                                                                                                                                                                                                                                                                                                                                                                                                                                                                                                                                                                                                                                                                                                                                                                   | -1,58 | 6,1E-02  | -0,46 | 1,0E+00 |
| 706   | 957  | 933  | 1012  | 219  | 357  | 2332  | 2570 | 2178 | ADCYAP1R1  | ADCYAP receptor type 1                                               | 7  | G protein-coupled receptor signaling pathway; cell surface receptor signaling pathway; multicellular organism development; cell differentiation; signal transduction; spermatogenesis; adenylate cyclase-modulating G protein-coupled receptor signaling pathway; activation of phospholipase C activity; positive regulation of calcium ion transport into cytosol; cAMP-mediated signaling; response to estradiol; multicellular organismal response to stress; response to drug; positive regulation of cAMP-mediated signaling; response to ethanol; development of primary female sexual characteristics; positive regulation of small GTPase mediated signal transduction; negative regulation of cell death; positive regulation of inositol phosphate biosynthetic process                                                                                                                                                                                                                                                           | -2,15 | 6,7E-02  | -1,43 | 9,1E-01 |
| 67    | 79   | 93   | 441   | 87   | 218  | 269   | 172  | 297  | HPCA       | hippocalcin                                                          | 1  | regulation of voltage-gated calcium channel activity; cellular response to calcium ion; brain development; positive regulation of phospholipase activity; response to organic cyclic compound; calcium-mediated signaling; negative regulation of guanylate cyclase activity; activation of phospholipase D activity; positive regulation of adenylate cyclase activity; inner ear development; retina development in camera-type eye; cellular response to electrical stimulus; positive regulation of protein targeting to membrane; regulation of postsynaptic neurotransmitter receptor internalization; response to ketamine; response to L-glutamate; cellular response to monosodium glutamate; response to Aroclor 1254                                                                                                                                                                                                                                                                                                              | -2,21 | 7,9E-02  | -0,94 | 1,0E+00 |
| 84    | 121  | 102  | 5291  | 1142 | 1677 | 3101  | 1858 | 2804 | WSCD2      | WSC domain containing 2                                              | 12 |                                                                                                                                                                                                                                                                                                                                                                                                                                                                                                                                                                                                                                                                                                                                                                                                                                                                                                                                                                                                                                              | -2,07 | 7,9E-02  | -1,54 | 8,0E-01 |
| 1427  | 505  | 675  | 1093  | 273  | 491  | 2460  | 2989 | 2585 | PRSS12     | serine protease 12                                                   | 4  | proteolysis; exocytosis; endocytosis; zymogen activation                                                                                                                                                                                                                                                                                                                                                                                                                                                                                                                                                                                                                                                                                                                                                                                                                                                                                                                                                                                     | -1,95 | 8,4E-02  | -1,11 | 1,0E+00 |
| 209   | 162  | 169  | 438   | 180  | 221  | 760   | 695  | 625  | SH3GL2     | SH3 domain containing GRB2 like 2, endophilin A1                     | 9  | negative regulation of gene expression; negative regulation of protein phosphorylation; endocytosis; antigen processing and presentation of exogenous peptide antigen via MHC class II; signal transduction; central nervous system development; membrane organization; neuron projection development; negative regulation of epidermal growth factor receptor signaling pathway; negative regulation of blood-brain barrier permeability; dendrite extension; cellular response to brain-derived neurotrophic factor stimulus; regulation of receptor internalization; synaptic vesicle uncoating; synaptic vesicle endocytosis; lipid tube assembly; membrane tubulation; membrane bending; vesicle scission; positive regulation of membrane tubulation; regulation of clathrin-dependent endocytosis                                                                                                                                                                                                                                     | -1,26 | 8,9E-02  | -0,97 | 8,0E-01 |
| 313   | 258  | 282  | 2409  | 827  | 1240 | 3613  | 4047 | 3832 | DOK5       | docking protein 5                                                    | 20 | axon guidance; transmembrane receptor protein tyrosine kinase signaling pathway; neuron differentiation; positive regulation of MAPK cascade; regulation of neurotrophin TRK receptor signaling pathway                                                                                                                                                                                                                                                                                                                                                                                                                                                                                                                                                                                                                                                                                                                                                                                                                                      | -1,50 | 9,9E-02  | -0,92 | 1,0E+00 |
| 4643  | 5228 | 4547 | 812   | 331  | 504  | 1390  | 1150 | 1184 | PCDH1      | protocadherin 1                                                      | 5  | homophilic cell adhesion via plasma membrane adhesion molecules; cell adhesion; nervous system development; cell-cell signaling                                                                                                                                                                                                                                                                                                                                                                                                                                                                                                                                                                                                                                                                                                                                                                                                                                                                                                              | -1,29 | 1,1E-01  | -0,68 | 1,0E+00 |
| 277   | 92   | 221  | 108   | 31   | 90   | 160   | 46   | 89   | FXN        | frataxin                                                             | 9  | iron-sulfur cluster assembly; oxidation-reduction process; positive regulation of cell population proliferation; negative regulation of apoptotic process; ion transport; cellular iron ion homeostasis; oxidative phosphorylation; heme biosynthetic process; mitochondrion organization; adult walking behavior; aerobic respiration; embryo development ending in birth or egg hatching; proprioception; negative regulation of multicellular organism growth; negative regulation of organ growth; iron ion homeostasis; positive regulation of cell growth; cellular response to hydrogen peroxide; negative regulation of release of cytochrome c from mitochondria; protein autoprocessing; positive regulation of catalytic activity; small molecule metabolic process; response to iron ion; regulation of ferredoxin activity; iron incorporation into metallo-sulfur cluster; positive regulation of lyase activity; positive regulation of succinate dehydrogenase activity; positive regulation of aconitate hydratase activity | -1,77 | 1,2E-01  | -0,26 | 1,0E+00 |
| 33154 | 40   | 35   | 21340 | 34   | 27   | 14136 | 20   | 41   | AP000763.2 | mitochondrially encoded cytochrome c oxidase I (MT-COI) pseudogene   | 11 |                                                                                                                                                                                                                                                                                                                                                                                                                                                                                                                                                                                                                                                                                                                                                                                                                                                                                                                                                                                                                                              | -9,15 | 6,0E-113 | -9,41 | 9,7E-75 |
| 552   | 3    | 2    | 421   | 2    | 1    | 305   | 1    | 2    | AC098847.1 | ribosomal protein, large, P0 pseudogene                              | 18 |                                                                                                                                                                                                                                                                                                                                                                                                                                                                                                                                                                                                                                                                                                                                                                                                                                                                                                                                                                                                                                              | -7,25 | 2,4E-34  | -7,68 | 8,2E-21 |
| 153   | 1    | 0    | 102   | 2    | 1    | 86    | 1    | 0    | ZBTB8OSP2  | zinc finger and BTB domain containing 8 opposite strand pseudogene 2 | 2  |                                                                                                                                                                                                                                                                                                                                                                                                                                                                                                                                                                                                                                                                                                                                                                                                                                                                                                                                                                                                                                              | -5,13 | 4,2E-08  | -6,16 | 6,0E-06 |
| 48    | 9    | 7    | 56    | 7    | 4    | 55    | 7    | 2    | PSMA6P1    | proteasome subunit alpha 6 pseudogene 1                              | Y  |                                                                                                                                                                                                                                                                                                                                                                                                                                                                                                                                                                                                                                                                                                                                                                                                                                                                                                                                                                                                                                              | -2,97 | 3,1E-07  | -3,54 | 6,0E-06 |
| 1051  | 53   | 127  | 61    | 1    | 1    | 40    | 1    | 1    | RHOXF1-AS1 | RHOXF1 antisense RNA 1                                               | X  |                                                                                                                                                                                                                                                                                                                                                                                                                                                                                                                                                                                                                                                                                                                                                                                                                                                                                                                                                                                                                                              | -5,34 | 7,2E-07  | -4,71 | 2,8E-04 |
| 30    | 1    | 2    | 81    | 3    | 2    | 77    | 2    | 3    | LERFS      | lncRNA                                                               | 9  |                                                                                                                                                                                                                                                                                                                                                                                                                                                                                                                                                                                                                                                                                                                                                                                                                                                                                                                                                                                                                                              | -4,51 | 8,9E-07  | -4,93 | 1,4E-05 |
| 50    | 7    | 14   | 111   | 7    | 8    | 186   | 16   | 29   | BX284668.2 | novel transcript                                                     | 1  |                                                                                                                                                                                                                                                                                                                                                                                                                                                                                                                                                                                                                                                                                                                                                                                                                                                                                                                                                                                                                                              | -3,80 | 3,9E-06  | -3,57 | 4,1E-04 |
| 60    | 17   | 20   | 404   | 104  | 98   | 364   | 115  | 126  | AF274858.1 | Morf4 family associated protein 1 (MRFAP1) pseudogene                | X  |                                                                                                                                                                                                                                                                                                                                                                                                                                                                                                                                                                                                                                                                                                                                                                                                                                                                                                                                                                                                                                              | -1,93 | 4,8E-06  | -2,00 | 4,7E-05 |
| 442   | 84   | 51   | 223   | 36   | 26   | 185   | 31   | 16   | SORD2P     | sorbitol dehydrogenase 2, pseudogene                                 | 15 |                                                                                                                                                                                                                                                                                                                                                                                                                                                                                                                                                                                                                                                                                                                                                                                                                                                                                                                                                                                                                                              | -2,55 | 5,3E-04  | -2,99 | 1,9E-04 |
| 117   | 18   | 20   | 86    | 14   | 16   | 101   | 10   | 12   | AC087343.1 | ribosomal protein L21 (RPI21) pseudogene                             | 8  |                                                                                                                                                                                                                                                                                                                                                                                                                                                                                                                                                                                                                                                                                                                                                                                                                                                                                                                                                                                                                                              | -2,54 | 7,4E-04  | -2,34 | 2,8E-02 |
| 46    | 7    | 9    | 114   | 32   | 22   | 109   | 52   | 56   | RASA4CP    | RAS p21 protein activator 4C, pseudogene                             | 7  |                                                                                                                                                                                                                                                                                                                                                                                                                                                                                                                                                                                                                                                                                                                                                                                                                                                                                                                                                                                                                                              | -1,79 | 3,0E-03  | -2,32 | 2,3E-04 |
| 128   | 13   | 14   | 146   | 8    | 3    | 115   | 6    | 7    | AACSP1     | acetoacetyl-CoA synthetase pseudogene 1                              | 5  |                                                                                                                                                                                                                                                                                                                                                                                                                                                                                                                                                                                                                                                                                                                                                                                                                                                                                                                                                                                                                                              | -3,84 | 6,2E-03  | -5,11 | 2,8E-04 |
| 0     | 0    | 0    | 82    | 28   | 41   | 52    | 76   | 64   | AC016717.2 | novel transcript                                                     | 2  |                                                                                                                                                                                                                                                                                                                                                                                                                                                                                                                                                                                                                                                                                                                                                                                                                                                                                                                                                                                                                                              | -1,49 | 2,0E-02  | -0,96 | 8,0E-01 |



|                               |             |               |                           |             |               |                       |             |               |             |                                                        |            |                                                                                                                                                                                                                                                                                                                                                                                                                                                                                                                                                                                                                                                                                                                                                                |                                      |            |                                        |            |
|-------------------------------|-------------|---------------|---------------------------|-------------|---------------|-----------------------|-------------|---------------|-------------|--------------------------------------------------------|------------|----------------------------------------------------------------------------------------------------------------------------------------------------------------------------------------------------------------------------------------------------------------------------------------------------------------------------------------------------------------------------------------------------------------------------------------------------------------------------------------------------------------------------------------------------------------------------------------------------------------------------------------------------------------------------------------------------------------------------------------------------------------|--------------------------------------|------------|----------------------------------------|------------|
| 92                            | 34          | 40            | 89                        | 32          | 39            | 107                   | 31          | 51            | LYRM4-AS1   | LYRM4 antisense RNA 1                                  | 6          |                                                                                                                                                                                                                                                                                                                                                                                                                                                                                                                                                                                                                                                                                                                                                                | -1,46                                | 2,1E-02    | -1,17                                  | 4,7E-01    |
| 3                             | 4           | 4             | 1036                      | 310         | 267           | 315                   | 482         | 255           | LINC01933   | long intergenic non-protein coding RNA 1933            | 5          |                                                                                                                                                                                                                                                                                                                                                                                                                                                                                                                                                                                                                                                                                                                                                                | -1,64                                | 7,2E-02    | -1,87                                  | 1,1E-01    |
| <b>MATURE NEURONS</b>         |             |               |                           |             |               |                       |             |               |             |                                                        |            |                                                                                                                                                                                                                                                                                                                                                                                                                                                                                                                                                                                                                                                                                                                                                                |                                      |            |                                        |            |
| <b>UPREGULATED GENES</b>      |             |               |                           |             |               |                       |             |               |             |                                                        |            |                                                                                                                                                                                                                                                                                                                                                                                                                                                                                                                                                                                                                                                                                                                                                                |                                      |            |                                        |            |
| <b>Normalized read counts</b> |             |               |                           |             |               |                       |             |               | <b>GENE</b> | <b>Description</b>                                     | <b>Chr</b> | <b>GO: Biological process</b>                                                                                                                                                                                                                                                                                                                                                                                                                                                                                                                                                                                                                                                                                                                                  | <b>Log<sub>2</sub>FC<br/>FRDA/CT</b> | <b>FDR</b> | <b>Log<sub>2</sub>FC<br/>ISO CT/CT</b> | <b>FDR</b> |
| <b>iPSCs</b>                  |             |               | <b>Developing Neurons</b> |             |               | <b>Mature Neurons</b> |             |               |             |                                                        |            |                                                                                                                                                                                                                                                                                                                                                                                                                                                                                                                                                                                                                                                                                                                                                                |                                      |            |                                        |            |
| <b>CT</b>                     | <b>FRDA</b> | <b>ISO CT</b> | <b>CT</b>                 | <b>FRDA</b> | <b>ISO CT</b> | <b>CT</b>             | <b>FRDA</b> | <b>ISO CT</b> |             |                                                        |            |                                                                                                                                                                                                                                                                                                                                                                                                                                                                                                                                                                                                                                                                                                                                                                |                                      |            |                                        |            |
| 0                             | 0           | 0             | 2                         | 31          | 38            | 17                    | 735         | 646           | GRIN3A      | glutamate ionotropic receptor NMDA type subunit 3A     | 9          | ion transport; ion transmembrane transport; calcium ion transport; calcium ion transmembrane transport; regulation of postsynaptic membrane potential; ionotropic glutamate receptor signaling pathway; response to ethanol; dendrite development; prepulse inhibition; regulation of synaptic vesicle exocytosis                                                                                                                                                                                                                                                                                                                                                                                                                                              | 5,36                                 | 3,1E-12    | 5,08                                   | 5,7E-09    |
| 122                           | 192         | 190           | 234                       | 533         | 531           | 194                   | 500         | 441           | MINDY1      | MINDY lysine 48 deubiquitinase 1                       | 1          | proteolysis; protein K48-linked deubiquitination                                                                                                                                                                                                                                                                                                                                                                                                                                                                                                                                                                                                                                                                                                               | 1,36                                 | 1,1E-08    | 1,18                                   | 5,5E-05    |
| 10                            | 144         | 122           | 15                        | 213         | 161           | 4                     | 124         | 88            | PCDHA11     | protocadherin alpha 11                                 | 5          | homophilic cell adhesion via plasma membrane adhesion molecules; cell adhesion; nervous system development                                                                                                                                                                                                                                                                                                                                                                                                                                                                                                                                                                                                                                                     | 4,52                                 | 6,9E-06    | 4,02                                   | 1,7E-03    |
| 2                             | 6           | 1             | 6                         | 35          | 4             | 1                     | 27          | 2             | PCDHA9      | protocadherin alpha 9                                  | 5          | homophilic cell adhesion via plasma membrane adhesion molecules; cell adhesion                                                                                                                                                                                                                                                                                                                                                                                                                                                                                                                                                                                                                                                                                 | 4,46                                 | 7,7E-06    | 0,82                                   | 1,0E+00    |
| 51                            | 79          | 89            | 11                        | 30          | 22            | 4                     | 57          | 27            | RORB        | RAR related orphan receptor B                          | 9          | regulation of transcription, DNA-templated; multicellular organism development; intracellular receptor signaling pathway; rhythmic process; visual perception; positive regulation of transcription, DNA-templated; response to stimulus; G protein-coupled receptor signaling pathway; positive regulation of transcription by RNA polymerase II; cellular response to retinoic acid; negative regulation of transcription, DNA-templated; transcription initiation from RNA polymerase II promoter; eye photoreceptor cell development; retina development in camera-type eye; regulation of circadian rhythm; negative regulation of osteoblast differentiation; retinal cone cell development; retinal rod cell development; amacrine cell differentiation | 3,50                                 | 9,6E-05    | 2,47                                   | 1,5E-01    |
| 31                            | 92          | 85            | 30                        | 133         | 157           | 12                    | 91          | 94            | PCDHGA10    | protocadherin gamma subfamily A, 10                    | 5          | homophilic cell adhesion via plasma membrane adhesion molecules; cell adhesion                                                                                                                                                                                                                                                                                                                                                                                                                                                                                                                                                                                                                                                                                 | 2,83                                 | 9,6E-05    | 2,88                                   | 7,8E-04    |
| 22                            | 40          | 49            | 19                        | 69          | 61            | 18                    | 48          | 44            | TSTD3       | thiosulfate sulfurtransferase like domain containing 3 | 6          |                                                                                                                                                                                                                                                                                                                                                                                                                                                                                                                                                                                                                                                                                                                                                                | 1,39                                 | 5,9E-04    | 1,27                                   | 2,2E-02    |
| 1                             | 399         | 429           | 1                         | 1224        | 1163          | 1                     | 739         | 1068          | TAFA5       | TAFA chemokine like family member 5                    | 22         | signal transduction                                                                                                                                                                                                                                                                                                                                                                                                                                                                                                                                                                                                                                                                                                                                            | 5,68                                 | 9,3E-04    | 6,01                                   | 1,8E-03    |
| 127                           | 118         | 141           | 768                       | 1061        | 1160          | 516                   | 1117        | 966           | C20orf194   | chromosome 20 open reading frame 194                   | 20         |                                                                                                                                                                                                                                                                                                                                                                                                                                                                                                                                                                                                                                                                                                                                                                | 1,11                                 | 2,3E-03    | 0,90                                   | 1,7E-01    |
| 14                            | 5           | 6             | 960                       | 1634        | 1042          | 161                   | 899         | 679           | NDUFA4L2    | NDUFA4 mitochondrial complex associated like 2         | 12         | proton transmembrane transport; electron transport chain                                                                                                                                                                                                                                                                                                                                                                                                                                                                                                                                                                                                                                                                                                       | 2,44                                 | 3,4E-03    | 2,01                                   | 1,7E-01    |
| 20                            | 62          | 68            | 41                        | 130         | 118           | 32                    | 99          | 109           | WASHC1      | WASH complex subunit 1                                 | 9          | Arp2/3 complex-mediated actin nucleation; protein transport; exocytosis; extracellular matrix disassembly; positive regulation of cell migration; negative regulation of autophagy; endosomal transport; positive regulation of pseudopodium assembly; regulation of protein ubiquitination; retrograde transport, endosome to Golgi; negative regulation of phosphatidylinositol 3-kinase activity; retrograde transport, endosome to plasma membrane                                                                                                                                                                                                                                                                                                         | 1,62                                 | 3,5E-03    | 1,75                                   | 6,3E-03    |
| 22                            | 42          | 65            | 575                       | 426         | 468           | 192                   | 615         | 452           | PRKG2       | protein kinase cGMP-dependent 2                        | 4          | protein phosphorylation; phosphorylation; signal transduction; peptidyl-serine autophosphorylation; protein localization to plasma membrane; negative regulation of chloride transport                                                                                                                                                                                                                                                                                                                                                                                                                                                                                                                                                                         | 1,67                                 | 7,3E-03    | 1,22                                   | 5,3E-01    |
| 178                           | 179         | 178           | 1167                      | 1158        | 935           | 383                   | 1016        | 716           | SLC10A7     | solute carrier family 10 member 7                      | 4          | ion transport; sodium ion transport; transmembrane transport; bone development; heparin biosynthetic process; Golgi vesicle transport; cellular calcium ion homeostasis; bile acid and bile salt transport; glycoprotein transport                                                                                                                                                                                                                                                                                                                                                                                                                                                                                                                             | 1,40                                 | 7,3E-03    | 0,89                                   | 8,5E-01    |
| 1                             | 1           | 0             | 11                        | 16          | 17            | 4                     | 54          | 43            | PLA2G12B    | phospholipase A2 group XIIB                            | 10         | phospholipid metabolic process; lipid catabolic process; arachidonic acid secretion; cholesterol homeostasis; triglyceride homeostasis                                                                                                                                                                                                                                                                                                                                                                                                                                                                                                                                                                                                                         | 3,68                                 | 8,0E-03    | 3,29                                   | 1,3E-01    |
| 10886                         | 15191       | 13263         | 8254                      | 19031       | 21163         | 6392                  | 12889       | 16069         | RPS23       | ribosomal protein S23                                  | 5          | translation; cytoplasmic translation; viral transcription; translational initiation; stress granule assembly; nuclear-transcribed mRNA catabolic process, nonsense-mediated decay; SRP-dependent cotranslational protein targeting to membrane; maintenance of translational fidelity                                                                                                                                                                                                                                                                                                                                                                                                                                                                          | 1,00                                 | 1,7E-02    | 1,32                                   | 1,1E-03    |
| 6                             | 14          | 17            | 5                         | 59          | 58            | 2                     | 22          | 20            | PCDHB8      | protocadherin beta 8                                   | 5          | homophilic cell adhesion via plasma membrane adhesion molecules; cell adhesion                                                                                                                                                                                                                                                                                                                                                                                                                                                                                                                                                                                                                                                                                 | 3,00                                 | 2,6E-02    | 2,90                                   | 1,3E-01    |
| 14                            | 23          | 38            | 54                        | 1074        | 203           | 2                     | 45          | 22            | OTX1        | orthodenticle homeobox 1                               | 2          | regulation of transcription, DNA-templated; multicellular organism development; positive regulation of transcription by RNA polymerase II; regulation of transcription by RNA polymerase II; anterior/posterior pattern specification; metencephalon development; forebrain development; midbrain development; inner ear morphogenesis; diencephalon morphogenesis                                                                                                                                                                                                                                                                                                                                                                                             | 3,71                                 | 4,3E-02    | 2,81                                   | 7,6E-01    |
| 288                           | 267         | 294           | 2101                      | 2305        | 1412          | 737                   | 1701        | 1095          | SRRM3       | serine/arginine repetitive matrix 3                    | 7          |                                                                                                                                                                                                                                                                                                                                                                                                                                                                                                                                                                                                                                                                                                                                                                | 1,20                                 | 4,4E-02    | 0,56                                   | 1,0E+00    |
| 176                           | 157         | 185           | 1218                      | 2469        | 1422          | 189                   | 440         | 308           | MUC1        | mucin 1, cell surface associated                       | 1          | stimulatory C-type lectin receptor signaling pathway; cytokine-mediated signaling pathway; negative regulation of transcription by competitive promoter binding; O-glycan processing; negative regulation of intrinsic apoptotic signaling pathway in response to DNA damage by p53 class mediator; DNA damage response, signal transduction by p53 class mediator resulting in transcription of p21 class                                                                                                                                                                                                                                                                                                                                                     | 1,20                                 | 6,2E-02    | 0,69                                   | 1,0E+00    |

|      |      |      |      |       |       |      |       |       |            |                                               |    |  |  |  |  |  |                                                                                                                                                                                                                                                                                                                                                                                                                                                                                                                                                                                                                                                                                                                                                                  |      |         |      |         |  |
|------|------|------|------|-------|-------|------|-------|-------|------------|-----------------------------------------------|----|--|--|--|--|--|------------------------------------------------------------------------------------------------------------------------------------------------------------------------------------------------------------------------------------------------------------------------------------------------------------------------------------------------------------------------------------------------------------------------------------------------------------------------------------------------------------------------------------------------------------------------------------------------------------------------------------------------------------------------------------------------------------------------------------------------------------------|------|---------|------|---------|--|
|      |      |      |      |       |       |      |       |       |            |                                               |    |  |  |  |  |  | mediator; DNA damage response; signal transduction by p53 class mediator resulting in cell cycle arrest; negative regulation of cell adhesion mediated by integrin; positive regulation of transcription from RNA polymerase II promoter in response to stress; regulation of transcription from RNA polymerase II promoter in response to stress; positive regulation of histone H4 acetylation                                                                                                                                                                                                                                                                                                                                                                 |      |         |      |         |  |
| 24   | 20   | 23   | 111  | 232   | 621   | 60   | 607   | 627   | ITGA11     | integrin subunit alpha 11                     | 15 |  |  |  |  |  | cell adhesion; integrin-mediated signaling pathway; extracellular matrix organization; cell-matrix adhesion; muscle organ development; osteoblast differentiation; cell adhesion mediated by integrin; substrate-dependent cell migration; collagen-activated signaling pathway                                                                                                                                                                                                                                                                                                                                                                                                                                                                                  | 3,10 | 6,4E-02 | 3,08 | 2,3E-01 |  |
| 43   | 54   | 47   | 2235 | 1598  | 1850  | 938  | 2485  | 1836  | MTUS2      | microtubule associated scaffold protein 2     | 13 |  |  |  |  |  |                                                                                                                                                                                                                                                                                                                                                                                                                                                                                                                                                                                                                                                                                                                                                                  | 1,40 | 6,4E-02 | 0,96 | 1,0E+00 |  |
| 2767 | 3382 | 2412 | 3207 | 3835  | 3013  | 2531 | 6633  | 4239  | MVD        | mevalonate diphosphate decarboxylase          | 16 |  |  |  |  |  | isoprenoid biosynthetic process; isopentenyl diphosphate biosynthetic process; mevalonate pathway; lipid metabolic process; steroid biosynthetic process; cholesterol biosynthetic process; steroid metabolic process; cholesterol metabolic process; sterol biosynthetic process; positive regulation of cell population proliferation; regulation of cholesterol biosynthetic process; dolichyl diphosphate biosynthetic process                                                                                                                                                                                                                                                                                                                               | 1,37 | 6,4E-02 | 0,73 | 1,0E+00 |  |
| 543  | 399  | 472  | 151  | 442   | 264   | 119  | 384   | 375   | TRAF5      | TNF receptor associated factor 5              | 1  |  |  |  |  |  | signal transduction; regulation of apoptotic process; positive regulation of I-kappaB kinase/NF-kappaB signaling; positive regulation of DNA-binding transcription factor activity; apoptotic process; regulation of I-kappaB kinase/NF-kappaB signaling; positive regulation of NF-kappaB transcription factor activity; protein K63-linked ubiquitination; tumor necrosis factor-mediated signaling pathway; positive regulation of JNK cascade                                                                                                                                                                                                                                                                                                                | 1,64 | 8,3E-02 | 1,60 | 3,3E-01 |  |
| 371  | 477  | 336  | 4    | 396   | 191   | 17   | 341   | 188   | COMT       | catechol-O-methyltransferase                  | 22 |  |  |  |  |  | catecholamine metabolic process; neurotransmitter catabolic process; methylation; developmental process; dopamine metabolic process; catecholamine catabolic process; response to organic cyclic compound; response to drug; short-term memory; cellular response to phosphate starvation; dopamine catabolic process; female pregnancy; learning; estrogen metabolic process; response to lipopolysaccharide; negative regulation of renal sodium excretion; response to estrogen; negative regulation of dopamine metabolic process; response to pain; multicellular organismal reproductive process; negative regulation of smooth muscle cell proliferation; positive regulation of homocysteine metabolic process; regulation of sensory perception of pain | 3,48 | 1,1E-01 | 2,68 | 9,4E-01 |  |
| 20   | 2624 | 2895 | 20   | 37489 | 38283 | 25   | 15558 | 15743 | NNAT       | neuronatin                                    | 20 |  |  |  |  |  | brain development; multicellular organism development; positive regulation of insulin secretion; protein lipoylation                                                                                                                                                                                                                                                                                                                                                                                                                                                                                                                                                                                                                                             | 4,30 | 1,5E-01 | 4,17 | 4,5E-01 |  |
| 2    | 427  | 451  | 4    | 538   | 707   | 5    | 286   | 468   | RPS4XP22   | ribosomal protein S4X pseudogene 22           | 19 |  |  |  |  |  |                                                                                                                                                                                                                                                                                                                                                                                                                                                                                                                                                                                                                                                                                                                                                                  | 5,71 | 2,3E-23 | 6,40 | 5,4E-28 |  |
| 11   | 7    | 9    | 9502 | 15271 | 10959 | 465  | 1969  | 2083  | AL161908.1 | novel transcript, antisense to LIM1B          | 9  |  |  |  |  |  |                                                                                                                                                                                                                                                                                                                                                                                                                                                                                                                                                                                                                                                                                                                                                                  | 2,06 | 1,1E-03 | 2,12 | 5,7E-03 |  |
| 4    | 1    | 1    | 9    | 10    | 23    | 2    | 131   | 47    | MIR4527HG  | MIR4527 host gene                             | 18 |  |  |  |  |  |                                                                                                                                                                                                                                                                                                                                                                                                                                                                                                                                                                                                                                                                                                                                                                  | 4,95 | 1,5E-02 | 3,47 | 6,9E-01 |  |
| 39   | 73   | 73   | 52   | 69    | 69    | 49   | 118   | 98    | AC026304.1 | novel transcript                              | 3  |  |  |  |  |  |                                                                                                                                                                                                                                                                                                                                                                                                                                                                                                                                                                                                                                                                                                                                                                  | 1,27 | 2,0E-02 | 0,99 | 5,8E-01 |  |
| 43   | 166  | 124  | 210  | 1927  | 1392  | 34   | 441   | 160   | H19        | H19 imprinted maternally expressed transcript | 11 |  |  |  |  |  |                                                                                                                                                                                                                                                                                                                                                                                                                                                                                                                                                                                                                                                                                                                                                                  | 3,28 | 3,2E-02 | 1,91 | 1,0E+00 |  |
| 0    | 0    | 1    | 43   | 65    | 51    | 7    | 50    | 49    | AL139351.3 | novel transcript                              | 20 |  |  |  |  |  |                                                                                                                                                                                                                                                                                                                                                                                                                                                                                                                                                                                                                                                                                                                                                                  | 2,75 | 4,6E-02 | 2,67 | 2,1E-01 |  |
| 1    | 0    | 0    | 410  | 381   | 413   | 236  | 639   | 514   | AC091980.2 | novel transcript, antisense to TLX3           | 5  |  |  |  |  |  |                                                                                                                                                                                                                                                                                                                                                                                                                                                                                                                                                                                                                                                                                                                                                                  | 1,45 | 7,5E-02 | 1,12 | 8,7E-01 |  |
| 72   | 31   | 54   | 15   | 25    | 30    | 5    | 58    | 31    | AC087276.1 | novel transcript, sense overlapping TTC17     | 11 |  |  |  |  |  |                                                                                                                                                                                                                                                                                                                                                                                                                                                                                                                                                                                                                                                                                                                                                                  | 3,04 | 9,4E-02 | 2,17 | 1,0E+00 |  |

**DOWNREGULATED GENES**

| Normalized read counts |      |        |                    |      |        |                |      |        | GENE   | Description                                               | Chr | GO: Biological process                                                                                                                                                                                                                                                                                                                                                                                                                                                                                                                                   | Log <sub>2</sub> FC<br>FRDA/CT | FDR     | Log <sub>2</sub> FC<br>ISO CT/CT | FDR     |
|------------------------|------|--------|--------------------|------|--------|----------------|------|--------|--------|-----------------------------------------------------------|-----|----------------------------------------------------------------------------------------------------------------------------------------------------------------------------------------------------------------------------------------------------------------------------------------------------------------------------------------------------------------------------------------------------------------------------------------------------------------------------------------------------------------------------------------------------------|--------------------------------|---------|----------------------------------|---------|
| iPSCs                  |      |        | Developing Neurons |      |        | Mature Neurons |      |        |        |                                                           |     |                                                                                                                                                                                                                                                                                                                                                                                                                                                                                                                                                          |                                |         |                                  |         |
| CT                     | FRDA | ISO CT | CT                 | FRDA | ISO CT | CT             | FRDA | ISO CT |        |                                                           |     |                                                                                                                                                                                                                                                                                                                                                                                                                                                                                                                                                          |                                |         |                                  |         |
| 19                     | 0    | 0      | 18                 | 0    | 0      | 11             | 0    | 0      | EIF3CL | eukaryotic translation initiation factor 3 subunit C like | 16  | translational initiation; formation of cytoplasmic translation initiation complex; cytoplasmic translational initiation; translation                                                                                                                                                                                                                                                                                                                                                                                                                     | -5,82                          | 2,4E-08 | -4,62                            | 4,2E-05 |
| 8433                   | 8351 | 7939   | 75                 | 28   | 39     | 156            | 30   | 47     | EPCAM  | epithelial cell adhesion molecule                         | 2   | ureteric bud development; negative regulation of apoptotic process; cell-cell adhesion via plasma-membrane adhesion molecules; positive regulation of cell motility; leukocyte migration; positive regulation of transcription by RNA polymerase II; stem cell differentiation; positive regulation of cell population proliferation; positive regulation of stem cell proliferation; signal transduction involved in regulation of gene expression; negative regulation of cell-cell adhesion mediated by cadherin                                      | -2,35                          | 4,3E-07 | -1,72                            | 1,5E-02 |
| 243                    | 285  | 225    | 598                | 568  | 810    | 5040           | 773  | 1177   | CBLN1  | cerebellin 1 precursor                                    | 16  | nervous system development; chemical synaptic transmission; synapse organization; heterophilic cell-cell adhesion via plasma membrane cell adhesion molecules; cerebellar granule cell differentiation; positive regulation of long-term synaptic depression; protein secretion; positive regulation of synapse assembly; negative regulation of excitatory postsynaptic potential; regulation of postsynaptic density assembly; maintenance of synapse structure; regulation of presynapse assembly; negative regulation of inhibitory synapse assembly | -2,62                          | 3,2E-06 | -2,03                            | 1,6E-02 |
| 88                     | 64   | 65     | 348                | 56   | 65     | 255            | 84   | 102    | SAXO2  | stabilizer of axonemal microtubules 2                     | 15  | microtubule anchoring                                                                                                                                                                                                                                                                                                                                                                                                                                                                                                                                    | -1,58                          | 2,1E-04 | -1,31                            | 5,0E-02 |
| 210                    | 100  | 85     | 196                | 90   | 120    | 236            | 103  | 128    | THNSL1 | threonine synthase like 1                                 | 10  |                                                                                                                                                                                                                                                                                                                                                                                                                                                                                                                                                          | -1,18                          | 3,0E-04 | -0,87                            | 1,7E-01 |

|       |      |      |       |      |     |       |     |     |            |                                                                      |    |                                                                                                                                                                                                                                                                                                                                                                                                                                                                                                                                                                                                                                                                                                                                                                                                                                                                                                                                                                                                                                                                                                                                                                                                          |       |         |       |         |
|-------|------|------|-------|------|-----|-------|-----|-----|------------|----------------------------------------------------------------------|----|----------------------------------------------------------------------------------------------------------------------------------------------------------------------------------------------------------------------------------------------------------------------------------------------------------------------------------------------------------------------------------------------------------------------------------------------------------------------------------------------------------------------------------------------------------------------------------------------------------------------------------------------------------------------------------------------------------------------------------------------------------------------------------------------------------------------------------------------------------------------------------------------------------------------------------------------------------------------------------------------------------------------------------------------------------------------------------------------------------------------------------------------------------------------------------------------------------|-------|---------|-------|---------|
| 3     | 5    | 8    | 0     | 0    | 0   | 46    | 1   | 4   | UTS2       | urotensin 2                                                          | 1  | regulation of blood vessel diameter; regulation of blood pressure; G protein-coupled receptor signaling pathway; muscle contraction; chemical synaptic transmission                                                                                                                                                                                                                                                                                                                                                                                                                                                                                                                                                                                                                                                                                                                                                                                                                                                                                                                                                                                                                                      | -4,38 | 7,3E-03 | -3,17 | 4,2E-01 |
| 3     | 4    | 6    | 314   | 90   | 97  | 1055  | 130 | 453 | SV2C       | synaptic vesicle glycoprotein 2C                                     | 5  | transmembrane transport; chemical synaptic transmission; neurotransmitter transport                                                                                                                                                                                                                                                                                                                                                                                                                                                                                                                                                                                                                                                                                                                                                                                                                                                                                                                                                                                                                                                                                                                      | -2,79 | 8,7E-03 | -1,09 | 1,0E+00 |
| 19    | 6    | 13   | 0     | 0    | 0   | 4     | 0   | 1   | RUNX3      | RUNX family transcription factor 3                                   | 1  | regulation of transcription, DNA-templated; positive regulation of transcription, DNA-templated; regulation of transcription by RNA polymerase II; neuron differentiation; regulation of cell differentiation; negative regulation of transcription by RNA polymerase II; negative regulation of cell cycle; protein phosphorylation; hemopoiesis; negative regulation of epithelial cell proliferation; ossification; negative regulation of CD4-positive, alpha-beta T cell differentiation; chondrocyte differentiation; peripheral nervous system neuron development; positive regulation of CD8-positive, alpha-beta T cell differentiation; response to transforming growth factor beta                                                                                                                                                                                                                                                                                                                                                                                                                                                                                                            | -3,49 | 1,5E-02 | -1,81 | 1,0E+00 |
| 45    | 65   | 84   | 4     | 2    | 3   | 297   | 22  | 99  | PTGER4     | prostaglandin E receptor 4                                           | 5  | G protein-coupled receptor signaling pathway; signal transduction; immune response; bone development; positive regulation of inflammatory response; negative regulation of inflammatory response; cellular response to mechanical stimulus; inflammatory response; ERK1 and ERK2 cascade; positive regulation of cytosolic calcium ion concentration; adenylate cyclase-activating G protein-coupled receptor signaling pathway; JNK cascade; negative regulation of cytokine secretion; regulation of stress fiber assembly; positive regulation of cytokine secretion; adenylate cyclase-modulating G protein-coupled receptor signaling pathway; T-helper cell differentiation; response to mechanical stimulus; regulation of ossification; response to lipopolysaccharide; negative regulation of integrin activation; cellular response to prostaglandin E stimulus; negative regulation of eosinophil extravasation                                                                                                                                                                                                                                                                               | -3,34 | 3,3E-02 | -1,37 | 1,0E+00 |
| 3     | 3    | 8    | 6     | 4    | 6   | 47    | 8   | 6   | METTL24    | methyltransferase like 24                                            | 6  | methylation                                                                                                                                                                                                                                                                                                                                                                                                                                                                                                                                                                                                                                                                                                                                                                                                                                                                                                                                                                                                                                                                                                                                                                                              | -2,42 | 4,3E-02 | -2,90 | 4,6E-02 |
| 1971  | 1862 | 1855 | 893   | 1052 | 955 | 1355  | 529 | 603 | ETV6       | ETS variant transcription factor 6                                   | 12 | regulation of transcription, DNA-templated; regulation of transcription by RNA polymerase II; vitellogenesis; neurogenesis; cell differentiation; positive regulation of transcription by RNA polymerase II; mesenchymal cell apoptotic process; negative regulation of transcription by RNA polymerase II; hematopoietic stem cell proliferation                                                                                                                                                                                                                                                                                                                                                                                                                                                                                                                                                                                                                                                                                                                                                                                                                                                        | -1,34 | 4,3E-02 | -1,15 | 5,0E-01 |
| 6180  | 5493 | 5431 | 166   | 146  | 162 | 498   | 219 | 221 | HAS3       | hyaluronan synthase 3                                                | 16 | positive regulation of transcription, DNA-templated; carbohydrate metabolic process; hyaluronan biosynthetic process; extracellular polysaccharide biosynthetic process; extracellular matrix assembly; positive regulation of hyaluronan cable assembly                                                                                                                                                                                                                                                                                                                                                                                                                                                                                                                                                                                                                                                                                                                                                                                                                                                                                                                                                 | -1,18 | 6,4E-02 | -1,16 | 2,7E-01 |
| 294   | 332  | 304  | 13    | 23   | 24  | 187   | 51  | 102 | PPP1R16B   | protein phosphatase 1 regulatory subunit 16B                         | 20 | regulation of phosphoprotein phosphatase activity; regulation of phosphatidylinositol 3-kinase signaling; negative regulation of protein dephosphorylation; positive regulation of endothelial cell proliferation; regulation of filopodium assembly; positive regulation of protein dephosphorylation; regulation of protein dephosphorylation; establishment of endothelial barrier; negative regulation of peptidyl-serine dephosphorylation; positive regulation of blood vessel endothelial cell proliferation involved in sprouting angiogenesis; regulation of sprouting angiogenesis                                                                                                                                                                                                                                                                                                                                                                                                                                                                                                                                                                                                             | -1,82 | 6,4E-02 | -0,84 | 1,0E+00 |
| 38    | 61   | 79   | 2     | 1    | 1   | 47    | 4   | 11  | PVALB      | parvalbumin                                                          | 22 | cochlea development                                                                                                                                                                                                                                                                                                                                                                                                                                                                                                                                                                                                                                                                                                                                                                                                                                                                                                                                                                                                                                                                                                                                                                                      | -3,05 | 7,8E-02 | -1,88 | 1,0E+00 |
| 71    | 80   | 58   | 78    | 49   | 40  | 71    | 17  | 37  | DACT2      | dishevelled binding antagonist of beta catenin 2                     | 6  | negative regulation of cell adhesion; epithelial cell morphogenesis; skin development; inner medullary collecting duct development; negative regulation of nodal signaling pathway; hematopoietic progenitor cell differentiation                                                                                                                                                                                                                                                                                                                                                                                                                                                                                                                                                                                                                                                                                                                                                                                                                                                                                                                                                                        | -1,99 | 8,4E-02 | -0,92 | 1,0E+00 |
| 553   | 901  | 925  | 70    | 50   | 53  | 284   | 97  | 116 | SOCS3      | suppressor of cytokine signaling 3                                   | 17 | intracellular signal transduction; negative regulation of apoptotic process; receptor signaling pathway via JAK-STAT; protein ubiquitination; negative regulation of signal transduction; regulation of growth; regulation of phosphatidylinositol 3-kinase activity; phosphatidylinositol phosphorylation; negative regulation of protein kinase activity; post-translational protein modification; cytokine-mediated signaling pathway; regulation of protein phosphorylation; positive regulation of tyrosine phosphorylation of STAT protein; negative regulation of tyrosine phosphorylation of STAT protein; regulation of cell differentiation; positive regulation of cell differentiation; negative regulation of receptor signaling pathway via JAK-STAT; negative regulation of insulin receptor signaling pathway; negative regulation of inflammatory response; regulation of interferon-gamma-mediated signaling pathway; branching involved in labyrinthine layer morphogenesis; placenta blood vessel development; trophoblast giant cell differentiation; spongiotrophoblast differentiation; interleukin-6-mediated signaling pathway; cellular response to leukemia inhibitory factor | -1,52 | 8,7E-02 | -1,27 | 7,4E-01 |
| 447   | 526  | 642  | 47    | 25   | 40  | 157   | 58  | 83  | DOCK9      | dedicator of cytokinesis 9                                           | 13 | small GTPase mediated signal transduction; positive regulation of GTPase activity; blood coagulation                                                                                                                                                                                                                                                                                                                                                                                                                                                                                                                                                                                                                                                                                                                                                                                                                                                                                                                                                                                                                                                                                                     | -1,40 | 1,4E-01 | -0,89 | 1,0E+00 |
| 376   | 434  | 335  | 5     | 3    | 6   | 51    | 14  | 14  | SYNJ2      | synaptojanin 2                                                       | 6  | phosphatidylinositol dephosphorylation; membrane organization; phosphatidylinositol biosynthetic process; synaptic vesicle endocytosis; brain development; inositol phosphate dephosphorylation                                                                                                                                                                                                                                                                                                                                                                                                                                                                                                                                                                                                                                                                                                                                                                                                                                                                                                                                                                                                          | -1,82 | 1,5E-01 | -1,80 | 4,9E-01 |
| 277   | 92   | 221  | 108   | 31   | 90  | 160   | 46  | 89  | FXN        | frataxin                                                             | 9  | iron-sulfur cluster assembly; oxidation-reduction process; positive regulation of cell population proliferation; negative regulation of apoptotic process; ion transport; cellular iron ion homeostasis; oxidative phosphorylation; heme biosynthetic process; mitochondrion organization; adult walking behavior; aerobic respiration; embryo development ending in birth or egg hatching; proprioception; negative regulation of multicellular organism growth; negative regulation of organ growth; iron ion homeostasis; positive regulation of cell growth; cellular response to hydrogen peroxide; negative regulation of release of cytochrome c from mitochondria; protein autoprocessing; positive regulation of catalytic activity; small molecule metabolic process; response to iron ion; regulation of ferrochelatase activity; iron incorporation into metallo-sulfur cluster; positive regulation of lyase activity; positive regulation of succinate dehydrogenase activity; positive regulation of aconitate hydratase activity                                                                                                                                                         | -1,75 | 2,1E-01 | -0,81 | 1,0E+00 |
| 33154 | 40   | 35   | 21340 | 34   | 27  | 14136 | 20  | 41  | AP000763.2 | mitochondrially encoded cytochrome c oxidase I (MT-COI) pseudogene   | 11 |                                                                                                                                                                                                                                                                                                                                                                                                                                                                                                                                                                                                                                                                                                                                                                                                                                                                                                                                                                                                                                                                                                                                                                                                          | -9,36 | 3,0E-95 | -8,27 | 3,5E-72 |
| 552   | 3    | 2    | 421   | 2    | 1   | 305   | 1   | 2   | AC098847.1 | ribosomal protein, large, P0 pseudogene                              | 18 |                                                                                                                                                                                                                                                                                                                                                                                                                                                                                                                                                                                                                                                                                                                                                                                                                                                                                                                                                                                                                                                                                                                                                                                                          | -7,42 | 3,9E-29 | -7,02 | 1,2E-19 |
| 44    | 14   | 15   | 32    | 11   | 8   | 80    | 14  | 16  | AC012184.3 | novel transcript, antisense to DDX19B and DDX19A                     | 16 |                                                                                                                                                                                                                                                                                                                                                                                                                                                                                                                                                                                                                                                                                                                                                                                                                                                                                                                                                                                                                                                                                                                                                                                                          | -2,53 | 6,5E-10 | -2,29 | 4,7E-06 |
| 153   | 1    | 0    | 102   | 2    | 1   | 86    | 1   | 0   | ZBTB80SP2  | zinc finger and BTB domain containing 8 opposite strand pseudogene 2 | 2  |                                                                                                                                                                                                                                                                                                                                                                                                                                                                                                                                                                                                                                                                                                                                                                                                                                                                                                                                                                                                                                                                                                                                                                                                          | -5,85 | 2,4E-08 | -6,73 | 7,6E-07 |
| 4     | 0    | 0    | 59    | 0    | 0   | 55    | 0   | 0   | ADGRF5P1   | adhesion G protein-coupled receptor F5 pseudogene 1                  | 9  |                                                                                                                                                                                                                                                                                                                                                                                                                                                                                                                                                                                                                                                                                                                                                                                                                                                                                                                                                                                                                                                                                                                                                                                                          | -7,27 | 1,8E-07 | -6,87 | 4,2E-05 |

|      |    |     |     |     |    |     |     |     |            |                                                       |    |  |       |         |       |         |
|------|----|-----|-----|-----|----|-----|-----|-----|------------|-------------------------------------------------------|----|--|-------|---------|-------|---------|
| 12   | 5  | 2   | 87  | 28  | 22 | 109 | 13  | 15  | AC027575.2 | novel transcript                                      | 18 |  | -2,97 | 2,6E-07 | -2,77 | 1,4E-04 |
| 117  | 18 | 20  | 86  | 14  | 16 | 101 | 10  | 12  | AC087343.1 | ribosomal protein L21 (RPI21) pseudogene              | 8  |  | -3,17 | 2,3E-06 | -2,96 | 7,5E-04 |
| 1051 | 53 | 127 | 61  | 1   | 1  | 40  | 1   | 1   | RHOXF1-AS1 | RHOXF1 antisense RNA 1                                | X  |  | -4,69 | 2,6E-05 | -4,24 | 3,9E-03 |
| 50   | 7  | 14  | 111 | 7   | 8  | 186 | 16  | 29  | BX284668.2 | novel transcript                                      | 1  |  | -3,37 | 4,5E-05 | -2,51 | 6,8E-02 |
| 60   | 17 | 20  | 404 | 104 | 98 | 364 | 115 | 126 | AF274858.1 | Morf4 family associated protein 1 (MRFAP1) pseudogene | X  |  | -1,63 | 4,0E-04 | -1,50 | 1,7E-02 |
| 442  | 84 | 51  | 223 | 36  | 26 | 185 | 31  | 16  | SORD2P     | sorbitol dehydrogenase 2, pseudogene                  | 15 |  | -2,53 | 6,7E-04 | -3,43 | 8,3E-06 |
| 92   | 34 | 40  | 89  | 32  | 39 | 107 | 31  | 51  | LYRM4-AS1  | LYRM4 antisense RNA 1                                 | 6  |  | -1,76 | 1,2E-03 | -1,05 | 7,8E-01 |
| 12   | 6  | 5   | 41  | 21  | 22 | 43  | 14  | 18  | AC009318.1 | novel transcript, antisense to FAR2                   | 12 |  | -1,57 | 4,4E-03 | -1,24 | 2,8E-01 |
| 128  | 13 | 14  | 146 | 8   | 3  | 115 | 6   | 7   | AACSP1     | acetoacetyl-CoA synthetase pseudogene 1               | 5  |  | -3,89 | 7,0E-03 | -3,55 | 9,5E-02 |
| 219  | 30 | 44  | 102 | 9   | 1  | 140 | 6   | 4   | LINC00668  | long intergenic non-protein coding RNA 668            | 18 |  | -4,03 | 4,0E-02 | -4,28 | 8,6E-02 |
| 1    | 0  | 1   | 50  | 11  | 22 | 74  | 8   | 27  | AC022182.2 | novel transcript                                      | 8  |  | -2,84 | 7,5E-02 | -1,27 | 1,0E+00 |
| 27   | 4  | 5   | 50  | 2   | 3  | 96  | 14  | 18  | LINC01783  | long intergenic non-protein coding RNA 1783           | 1  |  | -2,58 | 9,7E-02 | -2,17 | 7,3E-01 |

**Supplementary Table 3.** Gene and protein expression of commonly identified markers in FRDA.

| Gene name                          | Description                                           | Normalized read counts |           |             | Log <sub>2</sub> FC (FRDA vs CT) | Adj p-value | Mean peak intensity |           |             | Log <sub>2</sub> FC (FRDA vs CT) | p-value |
|------------------------------------|-------------------------------------------------------|------------------------|-----------|-------------|----------------------------------|-------------|---------------------|-----------|-------------|----------------------------------|---------|
|                                    |                                                       | Mean CT                | Mean FRDA | Mean ISO CT |                                  |             | Mean CT             | Mean FRDA | Mean ISO CT |                                  |         |
| <b>IRON HOMEOSTASIS</b>            |                                                       |                        |           |             |                                  |             |                     |           |             |                                  |         |
| ACO1 (IRP1)                        | aconitase 1                                           | 376,17                 | 396,17    | 377,87      | <b>0,071</b>                     | 0,968       | 14441,8             | 12354,5   | 21312,1     | <b>-0,225</b>                    | 0,424   |
| IREB2 (IRP2)                       | iron responsive element binding protein 2             | 9898,82                | 10504,92  | 9772,08     | <b>0,085</b>                     | 0,946       |                     |           |             |                                  |         |
| FTH1                               | ferritin heavy chain 1                                | 6297,04                | 8423,56   | 8313,49     | <b>0,417</b>                     | 0,718       | 13712,5             | 12471,7   | 7112,4      | <b>-0,137</b>                    | 0,654   |
| FTL                                | ferritin light chain                                  | 13635,7                | 16389,20  | 16557,82    | <b>0,261</b>                     | 0,849       | 10441,2             | 14490,8   | 17710,8     | <b>0,473</b>                     | 0,231   |
| IREG1                              | ferroportin-1                                         | 130,72                 | 116,48    | 172,49      | <b>-0,019</b>                    | 0,999       |                     |           |             |                                  |         |
| TFRC                               | transferrin receptor                                  | 4778,88                | 4439,17   | 5277,34     | <b>-0,116</b>                    | 0,962       | 14091,0             | 16383,5   | 22994,0     | <b>0,217</b>                     | 0,429   |
| FBXL5                              | F-box and leucine rich repeat protein 5               | 4546,78                | 4483,85   | 4778,91     | <b>-0,020</b>                    | 0,989       |                     |           |             |                                  |         |
| TF                                 | transferrin                                           | 56,52                  | 106,76    | 133,34      | <b>0,905</b>                     | 0,720       | 66054,1             | 53408,9   | 41030,9     | <b>-0,307</b>                    | 0,171   |
| TFRC                               | transferrin receptor                                  | 4778,88                | 4439,17   | 5277,34     | <b>-0,116</b>                    | 0,962       |                     |           |             |                                  |         |
| TFR2                               | transferrin receptor 2                                | 85,24                  | 136,71    | 133,94      | <b>0,674</b>                     | 0,716       |                     |           |             |                                  |         |
| SLC25A28                           | mitoferrin-2                                          | 695,91                 | 771,53    | 693,24      | <b>0,149</b>                     | 0,922       |                     |           |             |                                  |         |
| DMT1                               | solute carrier family 11 member 2                     | 2843,03                | 2777,61   | 2615,55     | <b>-0,035</b>                    | 0,980       |                     |           |             |                                  |         |
| HIF1A                              | hypoxia inducible factor 1 subunit alpha              | 8431,72                | 8814,44   | 8051,17     | <b>0,062</b>                     | 0,968       |                     |           |             |                                  |         |
| HIF1AN                             | hypoxia inducible factor 1 subunit alpha inhibitor    | 4709,07                | 4254,29   | 4498,54     | <b>-0,146</b>                    | 0,790       |                     |           |             |                                  |         |
| EPAS1 (HIF2A)                      | endothelial PAS domain protein 1                      | 42,40                  | 25,51     | 17,35       | <b>-0,696</b>                    | 0,869       |                     |           |             |                                  |         |
| <b>Fe-S CLUSTER METABOLISM</b>     |                                                       |                        |           |             |                                  |             |                     |           |             |                                  |         |
| NFS1                               | NFS1 cysteine desulfurase                             | 519,05                 | 445,19    | 488,85      | <b>-0,221</b>                    | 0,782       | 4592,0              | 3321,8    | 3360,0      | <b>-0,467</b>                    | 0,148   |
| ISCU                               | iron-sulfur cluster assembly enzyme                   | 1542,55                | 1898,36   | 1801,57     | <b>0,298</b>                     | 0,570       |                     |           |             |                                  |         |
| LYRM4 (ISD11)                      | LYR motif containing 4                                | 1063,58                | 1088,79   | 1135,61     | <b>0,033</b>                     | 0,984       |                     |           |             |                                  |         |
| ISCA1                              | iron-sulfur cluster assembly 1                        | 1556,89                | 1490,26   | 1549,56     | <b>-0,063</b>                    | 0,980       | 5923,7              | 7379,9    | 5711,2      | <b>0,317</b>                     | 0,607   |
| ISCA2                              | iron-sulfur cluster assembly 2                        | 516,06                 | 440,48    | 502,23      | <b>-0,228</b>                    | 0,835       |                     |           |             |                                  |         |
| FDX1                               | ferredoxin 1                                          | 114,96                 | 102,59    | 95,46       | <b>-0,166</b>                    | 0,913       |                     |           |             |                                  |         |
| FDXR                               | ferredoxin reductase                                  | 169,32                 | 181,38    | 148,10      | <b>0,093</b>                     | 0,974       | 18131,2             | 15805,7   | 17247,4     | <b>-0,198</b>                    | 0,635   |
| HSPA9                              | heat shock protein family A (Hsp70) member 9          | 2157,18                | 1818,66   | 1837,56     | <b>-0,247</b>                    | 0,809       | 667919,4            | 770581,7  | 788489      | <b>0,206</b>                     | 0,226   |
| HSCB                               | HscB mitochondrial iron-sulfur cluster cochaperone    | 190,57                 | 180,39    | 183,92      | <b>-0,083</b>                    | 0,962       |                     |           |             |                                  |         |
| GLRX                               | glutaredoxin                                          | 806,28                 | 1035,14   | 847,88      | <b>0,356</b>                     | 0,819       | 18840,9             | 16460,3   | 17493,4     | <b>-0,195</b>                    | 0,578   |
| GLRX2                              | glutaredoxin 2                                        | 332,32                 | 336,17    | 327,15      | <b>0,016</b>                     | 0,994       |                     |           |             |                                  |         |
| GLRX3                              | glutaredoxin 3                                        | 2524,20                | 2666,78   | 2548,81     | <b>0,078</b>                     | 0,962       | 105363,3            | 121356,2  | 131291      | <b>0,204</b>                     | 0,135   |
| NUBP1                              | nucleotide binding protein 1                          | 855,26                 | 712,76    | 649,25      | <b>-0,262</b>                    | 0,825       |                     |           |             |                                  |         |
| NUBP2                              | nucleotide binding protein 2                          | 656,82                 | 932,51    | 747,65      | <b>0,495</b>                     | 0,750       | 3785,5              | 4910,2    | 8705,8      | <b>0,375</b>                     | 0,384   |
| NARF                               | nuclear prelamin A recognition factor                 | 5655,53                | 5591,14   | 5798,12     | <b>-0,014</b>                    | 0,994       |                     |           |             |                                  |         |
| CIAO1                              | cytosolic iron-sulfur assembly component 1            | 2094,92                | 2110,34   | 2053,77     | <b>0,011</b>                     | 0,991       | 1429,7              | 4026      | 3406,1      | <b>1,494</b>                     | 0,011   |
| <b>MITOCHONDRIAL Fe-S PROTEINS</b> |                                                       |                        |           |             |                                  |             |                     |           |             |                                  |         |
| NDUFS1                             | NADH:ubiquinone oxidoreductase core subunit S1        | 2626,51                | 3040,60   | 2826,87     | <b>0,211</b>                     | 0,795       | 112035,3            | 133029,9  | 116340      | <b>0,248</b>                     | 0,088   |
| NDUFS2                             | NADH:ubiquinone oxidoreductase core subunit S2        | 1993,35                | 1919,07   | 2013,20     | <b>-0,054</b>                    | 0,963       | 121309,6            | 120737,1  | 112029      | <b>-0,007</b>                    | 0,958   |
| NDUFS7                             | NADH:ubiquinone oxidoreductase core subunit S7        | 479,92                 | 849,93    | 586,45      | <b>0,802</b>                     | 0,669       | 34396,8             | 46721,1   | 44989,1     | <b>0,442</b>                     | 0,021   |
| NDUFS8                             | NADH:ubiquinone oxidoreductase core subunit S8        | 1213,85                | 1702,99   | 1390,34     | <b>0,479</b>                     | 0,745       | 50235,0             | 78825,7   | 63470,6     | <b>0,650</b>                     | 0,136   |
| NDUFV1                             | NADH:ubiquinone oxidoreductase core subunit V1        | 4511,76                | 5241,70   | 4802,20     | <b>0,215</b>                     | 0,790       | 71843,9             | 64869,2   | 50453,0     | <b>-0,147</b>                    | 0,141   |
| NDUFV2                             | NADH:ubiquinone oxidoreductase core subunit V2        | 34,28                  | 60,87     | 39,30       | <b>0,794</b>                     | 0,791       | 107372,6            | 139448,4  | 136270      | <b>0,377</b>                     | 0,153   |
| SDHB                               | succinate dehydrogenase complex iron sulfur subunit B | 1270,98                | 1061,55   | 1073,89     | <b>-0,260</b>                    | 0,779       | 48769,6             | 45546,4   | 46100,7     | <b>-0,099</b>                    | 0,645   |
| UQCRCFS1                           | Rieske iron-sulfur protein                            | 492,89                 | 382,46    | 450,67      | <b>-0,363</b>                    | 0,851       | 135660,2            | 121098,9  | 123410      | <b>-0,164</b>                    | 0,306   |
| ACO2                               | aconitase 2                                           | 1333,28                | 1344,84   | 1372,49     | <b>0,012</b>                     | 0,993       | 212450,1            | 195053,9  | 174644      | <b>-0,123</b>                    | 0,213   |
| <b>OXIDATIVE STRESS</b>            |                                                       |                        |           |             |                                  |             |                     |           |             |                                  |         |
| SOD2                               | superoxide dismutase 2                                | 8828,19                | 8381,57   | 8668,55     | <b>-0,070</b>                    | 0,974       | 132451,8            | 143580,6  | 104841      | <b>0,116</b>                     | 0,153   |
| CAT                                | catalase                                              | 770,77                 | 1152,69   | 945,46      | <b>0,572</b>                     | 0,772       | 54048,4             | 63429,7   | 30772,2     | <b>0,231</b>                     | 0,497   |
| NFE2L2                             | nuclear factor, erythroid 2 like 2                    | 1237,90                | 1194,35   | 1209,02     | <b>-0,051</b>                    | 0,982       |                     |           |             |                                  |         |
| <b>DNA DAMAGE</b>                  |                                                       |                        |           |             |                                  |             |                     |           |             |                                  |         |
| MSH2                               | mutS homolog 2                                        | 1341,66                | 1213,53   | 1149,30     | <b>-0,146</b>                    | 0,919       | 36452,7             | 46858,0   | 65600,6     | <b>0,362</b>                     | 0,244   |
| MSH3                               | mutS homolog 3                                        | 258,46                 | 235,38    | 221,80      | <b>-0,136</b>                    | 0,918       | 1906,6              | 3248,7    | 2683,7      | <b>0,769</b>                     | 0,298   |
| MSH6                               | mutS homolog 6                                        | 1900,62                | 1402,77   | 1608,32     | <b>-0,435</b>                    | 0,765       | 23783,5             | 40868,3   | 81032,6     | <b>0,781</b>                     | 0,091   |

**Supplementary Table 4.** List of identified differentially expressed proteins in FRDA and ISO CT mature neurons.

| DIFFERENTIALLY EXPRESSED PROTEINS – FRDA vs CT |                                                                                                                                                               |                                                                                                                                                                                                                                                                                                                                                                                                                                                                                                                                                                                                                                                                                                                                                                                                                                                                                                                                                                                                                                                                                                                                                                                                                                                                                                                                                                                                                                                                                                                                                                                                                                                                                                                                                                           |         |                             |           |             |           |             |                             |
|------------------------------------------------|---------------------------------------------------------------------------------------------------------------------------------------------------------------|---------------------------------------------------------------------------------------------------------------------------------------------------------------------------------------------------------------------------------------------------------------------------------------------------------------------------------------------------------------------------------------------------------------------------------------------------------------------------------------------------------------------------------------------------------------------------------------------------------------------------------------------------------------------------------------------------------------------------------------------------------------------------------------------------------------------------------------------------------------------------------------------------------------------------------------------------------------------------------------------------------------------------------------------------------------------------------------------------------------------------------------------------------------------------------------------------------------------------------------------------------------------------------------------------------------------------------------------------------------------------------------------------------------------------------------------------------------------------------------------------------------------------------------------------------------------------------------------------------------------------------------------------------------------------------------------------------------------------------------------------------------------------|---------|-----------------------------|-----------|-------------|-----------|-------------|-----------------------------|
| UPREGULATED                                    |                                                                                                                                                               |                                                                                                                                                                                                                                                                                                                                                                                                                                                                                                                                                                                                                                                                                                                                                                                                                                                                                                                                                                                                                                                                                                                                                                                                                                                                                                                                                                                                                                                                                                                                                                                                                                                                                                                                                                           |         |                             |           |             |           |             |                             |
| PROTEIN                                        | GROUP AND RELATED GENE (GN)                                                                                                                                   | GO: BIOLOGICAL FUNCTION                                                                                                                                                                                                                                                                                                                                                                                                                                                                                                                                                                                                                                                                                                                                                                                                                                                                                                                                                                                                                                                                                                                                                                                                                                                                                                                                                                                                                                                                                                                                                                                                                                                                                                                                                   | P-value | Protein Mean Peak Intensity |           |             |           |             | Log <sub>2</sub> FC FRDA/CT |
|                                                |                                                                                                                                                               |                                                                                                                                                                                                                                                                                                                                                                                                                                                                                                                                                                                                                                                                                                                                                                                                                                                                                                                                                                                                                                                                                                                                                                                                                                                                                                                                                                                                                                                                                                                                                                                                                                                                                                                                                                           |         | Mean CT                     | Mean FRDA | Mean ISO CT | Median CT | Median FRDA |                             |
| sp Q9H4L7-3 SMRCD_HUMAN                        | Isoform 3 of SWI/SNF-related matrix-associated actin-dependent regulator of chromatin subfamily A containing DEAD/H box 1 OS=Homo sapiens OX=9606 GN=SMARCAD1 | ATPase activity, acting on DNA; ATP binding; chromatin binding; DNA binding; DNA helicase activity; nucleosome-dependent ATPase activity; ubiquitin bindin; ATP-dependent chromatin remodeling; chromatin remodeling; chromosome separation; DNA double-strand break processing; histone H3 deacetylation; histone H4 deacetylation; regulation of DNA recombination                                                                                                                                                                                                                                                                                                                                                                                                                                                                                                                                                                                                                                                                                                                                                                                                                                                                                                                                                                                                                                                                                                                                                                                                                                                                                                                                                                                                      | 0,003   | 2383,1                      | 6056,7    | 4878,7      | 2501,5    | 6254,7      | 1,35                        |
| sp Q9BRJ2 RM45_HUMAN                           | 39S ribosomal protein L45, mitochondrial OS=Homo sapiens OX=9606 GN=MRPL45 PE=1 SV=2                                                                          | RNA binding; mitochondrial translational elongation; mitochondrial translational termination                                                                                                                                                                                                                                                                                                                                                                                                                                                                                                                                                                                                                                                                                                                                                                                                                                                                                                                                                                                                                                                                                                                                                                                                                                                                                                                                                                                                                                                                                                                                                                                                                                                                              | 0,006   | 3162,0                      | 8172,4    | 6993,8      | 2309,5    | 8422,2      | 1,37                        |
| sp P19525 E2AK2_HUMAN                          | Interferon-induced, double-stranded RNA-activated protein kinase OS=Homo sapiens OX=9606 GN=EIF2AK2 PE=1 SV=2                                                 | ATP binding; double-stranded RNA binding; eukaryotic translation initiation factor 2alpha kinase activity; identical protein binding; non-membrane spanning protein tyrosine kinase activity; protein kinase activity; protein serine kinase activity; protein threonine kinase activity; transmembrane receptor protein tyrosine kinase activity; activation of MAPKK activity; cellular response to amino acid starvation; defense response to virus; endoplasmic reticulum unfolded protein response, innate immune response; negative regulation of apoptotic process; negative regulation of osteoblast proliferation; negative regulation of translation; negative regulation of viral genome replication; positive regulation of apoptotic process; positive regulation of chemokine production; positive regulation of cytokine production; positive regulation of NF-kappaB transcription factor activity; positive regulation of NIK/NF-kappaB signaling; positive regulation of stress-activated MAPK cascade; protein autophosphorylation; protein phosphorylation; regulation of hematopoietic progenitor cell differentiation; regulation of hematopoietic stem cell differentiation; regulation of hematopoietic stem cell proliferation; regulation of NLRP3 inflammasome complex assembly; response to interferon-alpha; response to lipopolysaccharide; response to toxic substance; response to virus; response to vitamin E; translation                                                                                                                                                                                                                                                                                                              | 0,005   | 3072,5                      | 11122,9   | 11814,6     | 2972,5    | 8138,0      | 1,86                        |
| sp A1L0T0 ILVBL_HUMAN                          | Acetolactate synthase-like protein OS=Homo sapiens OX=9606 GN=ILVBL PE=1 SV=2                                                                                 | acetylactate synthase activity; flavin adenine dinucleotide binding; lyase activity; magnesium ion binding; thiamine pyrophosphate binding; acetolactate synthase activity; flavin adenine dinucleotide binding; lyase activity; magnesium ion binding; thiamine pyrophosphate binding; fatty acid alpha-oxidation; isoleucine biosynthetic process; valine biosynthetic process                                                                                                                                                                                                                                                                                                                                                                                                                                                                                                                                                                                                                                                                                                                                                                                                                                                                                                                                                                                                                                                                                                                                                                                                                                                                                                                                                                                          | 0,003   | 14797,6                     | 30474,7   | 29355,4     | 14787,4   | 27224,7     | 1,04                        |
| sp Q16822 PCKGM_HUMAN                          | Phosphoenolpyruvate carboxykinase [GTP], mitochondrial OS=Homo sapiens OX=9606 GN=PCK2 PE=1 SV=4                                                              | GTP binding; manganese ion binding; cellular response to dexamethasone stimulus; cellular response to glucose stimulus; cellular response to insulin stimulus; cellular response to tumor necrosis; gluconeogenesis; glycerol biosynthetic process from pyruvate; hepatocyte differentiation; NADH oxidation; oxaloacetate metabolic process; positive regulation of insulin secretion; propionate catabolic process; response to lipid; response to lipopolysaccharide; response to starvation                                                                                                                                                                                                                                                                                                                                                                                                                                                                                                                                                                                                                                                                                                                                                                                                                                                                                                                                                                                                                                                                                                                                                                                                                                                                           | 0,008   | 15690,9                     | 32336,3   | 29279,3     | 17062,8   | 36017,7     | 1,04                        |
| sp Q9UQ16-2 DYN3_HUMAN                         | Isoform 2 of Dynamin-3 OS=Homo sapiens OX=9606 GN=DNM3                                                                                                        | GTPase activity; GTP binding; identical protein binding; microtubule binding; nitric-oxide synthase binding; structural constituent of postsynapse; type 1 metabotropic glutamate receptor binding; type 5 metabotropic glutamate receptor binding; dynamin family protein polymerization involved in mitochondrial fission; endocytosis; filopodium assembly; membrane fusion; mitochondrial fission; negative regulation of dendritic spine; morphogenesis; positive regulation of filopodium assembly; positive regulation of synaptic vesicle recycling; postsynaptic neurotransmitter receptor internalization; receptor internalization; regulation of synapse structure or activity; synapse assembly; synaptic vesicle budding from presynaptic endocytic zone membrane                                                                                                                                                                                                                                                                                                                                                                                                                                                                                                                                                                                                                                                                                                                                                                                                                                                                                                                                                                                           | 0,002   | 34483,6                     | 73319,7   | 39624,3     | 39350,4   | 76370,3     | 1,09                        |
| sp Q86VN1 VPS36_HUMAN                          | Vacuolar protein-sorting-associated protein 36 OS=Homo sapiens OX=9606 GN=VPS36 PE=1 SV=1                                                                     | phosphatidylinositol-3-phosphate binding; protein C-terminus binding; ubiquitin binding; endosomal transport; macroautophagy; multivesicular body assembly; protein transport to vacuole involved in ubiquitin-dependent protein catabolic process via the multivesicular body sorting pathway                                                                                                                                                                                                                                                                                                                                                                                                                                                                                                                                                                                                                                                                                                                                                                                                                                                                                                                                                                                                                                                                                                                                                                                                                                                                                                                                                                                                                                                                            | 0,001   | 6324,8                      | 13900,4   | 9997,8      | 6734,2    | 13474,7     | 1,14                        |
| sp Q9UQ13 SHOC2_HUMAN                          | Leucine-rich repeat protein SHOC-2 OS=Homo sapiens OX=9606 GN=SHOC2 PE=1 SV=2                                                                                 | protein phosphatase 1 binding; protein phosphatase regulator activity; fibroblast growth factor receptor signaling pathway; MAPK cascade; positive regulation of Ras protein signal transduction; Ras protein signal transduction; signal transduction                                                                                                                                                                                                                                                                                                                                                                                                                                                                                                                                                                                                                                                                                                                                                                                                                                                                                                                                                                                                                                                                                                                                                                                                                                                                                                                                                                                                                                                                                                                    | 0,002   | 8455,5                      | 18748,0   | 11569,1     | 9299,4    | 17982,7     | 1,15                        |
| sp P60953-1 CDC42_HUMAN                        | Isoform 1 of Cell division control protein 42 homolog OS=Homo sapiens OX=9606 GN=CDC42                                                                        | G protein activity; GTPase activity; GTP binding; GTP-dependent protein binding; identical protein binding; mitogen-activated protein kinase kinase binding; protein kinase binding; thioesterase binding; ubiquitin protein ligase activity; actin cytoskeleton organization; actin filament branching; actin filament organization; adherens junction organization; cardiac conduction system development; Cdc42 protein signal transduction; cell migration; cell projection assembly; cellular protein localization; cellular response to interferon-gamma; dendritic cell migration; dendritic spine morphogenesis; endocytosis; establishment of Golgi localization; establishment or maintenance of cell polarity; Fc-gamma receptor signaling pathway involved in phagocytosis; filopodium assembly; Golgi organization; heart contraction; integrin-mediated signaling pathway; modification of synaptic structure; negative regulation of epidermal growth factor receptor signaling pathway; negative regulation of protein-containing complex assembly; neuron fate determination; neuropilin signaling pathway; nuclear migration; organelle transport along microtubule; positive regulation of filopodium assembly; positive regulation of intracellular protein transport; positive regulation of lamellipodium assembly; positive regulation of muscle cell differentiation; positive regulation of neuron apoptotic process; positive regulation of stress fiber assembly; positive regulation of substrate adhesion-dependent cell spreading; positive regulation of synapse structural plasticity; regulation of attachment of spindle microtubules to kinetochore; viral RNA genome replication; Wnt signaling pathway, planar cell polarity pathway | 0,007   | 8005,6                      | 18426,8   | 8752,9      | 4504,4    | 21819,9     | 1,20                        |
| sp Q5VWJ9 SNX30_HUMAN                          | Sorting nexin-30 OS=Homo sapiens OX=9606 GN=SNX30 PE=1 SV=1                                                                                                   | Phosphatidylinositol binding; protein transport; intracellular trafficking                                                                                                                                                                                                                                                                                                                                                                                                                                                                                                                                                                                                                                                                                                                                                                                                                                                                                                                                                                                                                                                                                                                                                                                                                                                                                                                                                                                                                                                                                                                                                                                                                                                                                                | 0,002   | 6938,5                      | 18207,1   | 17019,6     | 7531,6    | 18044,3     | 1,39                        |

| sp Q96M27 PRRC1_HUMAN   | Protein PRRC1 OS=Homo sapiens OX=9606 GN=PRRC1 PE=1 SV=1                                | Identical protein binding; activation of PKA activity                                                                                                                                                                                                                                                                                                                                                                                                                                                                                                                                                                                                                                                                                                                                                                                                                                                                                                                                                                                                                                                                                                                                                                                                                                                                                                                                                                                                                                                                                                                                                                                                                                                                                                                                                                                                                                                                                                                                                                                                                                                                                              | 0,003   | 3420,4                      | 9135,2    | 10360,5     | 3245,2    | 8698,4      | 1,42                        |  |
|-------------------------|-----------------------------------------------------------------------------------------|----------------------------------------------------------------------------------------------------------------------------------------------------------------------------------------------------------------------------------------------------------------------------------------------------------------------------------------------------------------------------------------------------------------------------------------------------------------------------------------------------------------------------------------------------------------------------------------------------------------------------------------------------------------------------------------------------------------------------------------------------------------------------------------------------------------------------------------------------------------------------------------------------------------------------------------------------------------------------------------------------------------------------------------------------------------------------------------------------------------------------------------------------------------------------------------------------------------------------------------------------------------------------------------------------------------------------------------------------------------------------------------------------------------------------------------------------------------------------------------------------------------------------------------------------------------------------------------------------------------------------------------------------------------------------------------------------------------------------------------------------------------------------------------------------------------------------------------------------------------------------------------------------------------------------------------------------------------------------------------------------------------------------------------------------------------------------------------------------------------------------------------------------|---------|-----------------------------|-----------|-------------|-----------|-------------|-----------------------------|--|
| sp Q9Y4P1-2 ATG4B_HUMAN | Isoform 2 of Cysteine protease ATG4B OS=Homo sapiens OX=9606 GN=ATG4B                   | cysteine-type endopeptidase activity; autophagy; macroautophagy; positive regulation of protein catabolic process; protein delipidation; protein transport; proteolysis                                                                                                                                                                                                                                                                                                                                                                                                                                                                                                                                                                                                                                                                                                                                                                                                                                                                                                                                                                                                                                                                                                                                                                                                                                                                                                                                                                                                                                                                                                                                                                                                                                                                                                                                                                                                                                                                                                                                                                            | 0,003   | 971,0                       | 2853,9    | 1851,7      | 745,8     | 3439,5      | 1,56                        |  |
| sp Q86W56-4 PARG_HUMAN  | Isoform 4 of Poly(ADP-ribose) glycohydrolase OS=Homo sapiens OX=9606 GN=PARG            | poly(ADP-ribose) glycohydrolase activity; ATP generation from poly-ADP-D-ribose; base-excision repair; gap-filling; carbohydrate metabolic process; nucleotide-sugar metabolic process; regulation of DNA repair; regulation of histone modification                                                                                                                                                                                                                                                                                                                                                                                                                                                                                                                                                                                                                                                                                                                                                                                                                                                                                                                                                                                                                                                                                                                                                                                                                                                                                                                                                                                                                                                                                                                                                                                                                                                                                                                                                                                                                                                                                               | 0,006   | 6888,5                      | 21685,1   | 8766,8      | 2726,1    | 24338,9     | 1,65                        |  |
| sp Q7Z3J2 VP35L_HUMAN   | VPS35 endosomal protein sorting factor-like OS=Homo sapiens OX=9606 GN=VPS35L PE=1 SV=2 | endocytic recycling; Golgi to plasma membrane transport; neutrophil degranulation; protein transport                                                                                                                                                                                                                                                                                                                                                                                                                                                                                                                                                                                                                                                                                                                                                                                                                                                                                                                                                                                                                                                                                                                                                                                                                                                                                                                                                                                                                                                                                                                                                                                                                                                                                                                                                                                                                                                                                                                                                                                                                                               | 0,005   | 2641,4                      | 6463,8    | 6618,5      | 2207,2    | 6745,8      | 1,29                        |  |
| sp P10909-5 CLUS_HUMAN  | Isoform 5 of Clusterin OS=Homo sapiens OX=9606 GN=CLU                                   | amyloid-beta binding; chaperone binding; low-density lipoprotein particle receptor binding; misfolded protein binding; protein-containing complex binding; protein heterodimerization activity; signaling receptor binding; tau protein binding; ubiquitin protein ligase binding; unfolded protein binding; antimicrobial humoral response; cell morphogenesis; central nervous system myelin maintenance; chaperone-mediated protein complex assembly; chaperone-mediated protein folding; complement activation; immune response; regulation of amyloid-beta formation; regulation of neuronal signal transduction; regulation of neuron death; release of cytochrome c from mitochondria                                                                                                                                                                                                                                                                                                                                                                                                                                                                                                                                                                                                                                                                                                                                                                                                                                                                                                                                                                                                                                                                                                                                                                                                                                                                                                                                                                                                                                                       | 0,008   | 51063,8                     | 119029,0  | 79311,2     | 50662,5   | 117686,8    | 1,22                        |  |
| sp P07942 LAMB1_HUMAN   | Laminin subunit beta-1 OS=Homo sapiens OX=9606 GN=LAMB1 PE=1 SV=2                       | Cell Adhesion; cell migration; extracellular matrix organization; neuron projection development; neuronal interaction involved in cerebral cortex radial migration                                                                                                                                                                                                                                                                                                                                                                                                                                                                                                                                                                                                                                                                                                                                                                                                                                                                                                                                                                                                                                                                                                                                                                                                                                                                                                                                                                                                                                                                                                                                                                                                                                                                                                                                                                                                                                                                                                                                                                                 | 0,003   | 24084,1                     | 75103,3   | 50825,5     | 25640,4   | 93515,5     | 1,64                        |  |
| <b>DOWNREGULATED</b>    |                                                                                         |                                                                                                                                                                                                                                                                                                                                                                                                                                                                                                                                                                                                                                                                                                                                                                                                                                                                                                                                                                                                                                                                                                                                                                                                                                                                                                                                                                                                                                                                                                                                                                                                                                                                                                                                                                                                                                                                                                                                                                                                                                                                                                                                                    |         |                             |           |             |           |             |                             |  |
| PROTEIN                 | GROUP AND RELATED GENE (GN)                                                             | GO: BIOLOGICAL FUNCTION                                                                                                                                                                                                                                                                                                                                                                                                                                                                                                                                                                                                                                                                                                                                                                                                                                                                                                                                                                                                                                                                                                                                                                                                                                                                                                                                                                                                                                                                                                                                                                                                                                                                                                                                                                                                                                                                                                                                                                                                                                                                                                                            | P-value | Protein Mean Peak Intensity |           |             |           |             | Log <sub>2</sub> FC FRDA/CT |  |
|                         |                                                                                         |                                                                                                                                                                                                                                                                                                                                                                                                                                                                                                                                                                                                                                                                                                                                                                                                                                                                                                                                                                                                                                                                                                                                                                                                                                                                                                                                                                                                                                                                                                                                                                                                                                                                                                                                                                                                                                                                                                                                                                                                                                                                                                                                                    |         | Mean CT                     | Mean FRDA | Mean ISO CT | Median CT | Median FRDA |                             |  |
| sp Q02539 H11_HUMAN     | Histone H1.1 OS=Homo sapiens OX=9606 GN=HIST1H1A PE=1 SV=3                              | chromosome condensation; negative regulation of chromatin silencing; negative regulation of DNA recombination; chromatin binding; double-stranded DNA binding                                                                                                                                                                                                                                                                                                                                                                                                                                                                                                                                                                                                                                                                                                                                                                                                                                                                                                                                                                                                                                                                                                                                                                                                                                                                                                                                                                                                                                                                                                                                                                                                                                                                                                                                                                                                                                                                                                                                                                                      | 0,000   | 162206,4                    | 14742,2   | 7956,5      | 152890,7  | 12918,8     | -3,46                       |  |
| sp Q96S19-5 MTL26_HUMAN | Isoform 5 of Methyltransferase-like 26 OS=Homo sapiens OX=9606 GN=METTL26               | methyltransferase                                                                                                                                                                                                                                                                                                                                                                                                                                                                                                                                                                                                                                                                                                                                                                                                                                                                                                                                                                                                                                                                                                                                                                                                                                                                                                                                                                                                                                                                                                                                                                                                                                                                                                                                                                                                                                                                                                                                                                                                                                                                                                                                  | 0,004   | 26797,8                     | 6447,1    | 6426,1      | 26698,2   | 1487,3      | -2,06                       |  |
| sp P54198-2 HIRA_HUMAN  | Isoform Short of Protein HIRA OS=Homo sapiens OX=9606 GN=HIRA                           | histone binding; RNA polymerase II transcription factor binding; transcription corepressor activity anatomical structure morphogenesis; DNA replication-independent nucleosome assembly; regulation of transcription by RNA polymerase II; transcription, DNA-templated                                                                                                                                                                                                                                                                                                                                                                                                                                                                                                                                                                                                                                                                                                                                                                                                                                                                                                                                                                                                                                                                                                                                                                                                                                                                                                                                                                                                                                                                                                                                                                                                                                                                                                                                                                                                                                                                            | 0,004   | 8658,0                      | 3299,6    | 2955,7      | 7770,3    | 2667,1      | -1,39                       |  |
| sp P52926 HMGA2_HUMAN   | High mobility group protein HMGI-C OS=Homo sapiens OX=9606 GN=HMGA2 PE=1 SV=1           | DNA binding; nucleosomal binding; SMAD binding; transcription coregulator activity; transcription corepressor activity; transcription factor binding; transcription regulatory region sequence-specific DNA binding; base-excision repair; cell division; chondrocyte differentiation; chromatin organization; chromosome breakage; chromosome condensation; DNA damage response, detection of DNA damage; endodermal cell differentiation; epithelial to mesenchymal transition; fat cell differentiation; heterochromatin assembly; histone H2A-S139 phosphorylation; mesenchymal cell differentiation; mesodermal cell differentiation; mesodermal-endodermal cell signaling; mitotic G2 DNA damage checkpoint; multicellular organism development; negative regulation by host of viral transcription; negative regulation of apoptotic process; negative regulation of cellular senescence; negative regulation of DNA binding; negative regulation of double-strand break repair via nonhomologous end joining; negative regulation of single stranded viral RNA replication via double stranded DNA intermediate; negative regulation of transcription, DNA-templated; negative regulation of transcription by RNA polymerase II; oncogene-induced cell senescence; positive regulation of angiogenesis; positive regulation of apoptotic process; positive regulation of cell proliferation in bone marrow; positive regulation of cellular response to X-ray; positive regulation of cellular senescence; positive regulation of gene expression; positive regulation of protein serine/threonine kinase activity; positive regulation of response to DNA damage stimulus; positive regulation of stem cell proliferation; positive regulation of transcription, DNA-templated; positive regulation of transcription by RNA polymerase II; regulation of cell cycle process; regulation of cellular response to drug; regulation of growth regulation of stem cell population maintenance; regulation of transcription, DNA-templated; response to virus; senescence-associated heterochromatin focus assembly; stem cell differentiation | 0,000   | 94730,2                     | 37407,7   | 54202,3     | 79679,0   | 34183,4     | -1,34                       |  |
| sp Q6BDS2 URFB1_HUMAN   | UHRF1-binding protein 1 OS=Homo sapiens OX=9606 GN=UHRF1BP1 PE=1 SV=1                   | histone deacetylase binding; identical protein binding; may act as a negative regulator of cell growth                                                                                                                                                                                                                                                                                                                                                                                                                                                                                                                                                                                                                                                                                                                                                                                                                                                                                                                                                                                                                                                                                                                                                                                                                                                                                                                                                                                                                                                                                                                                                                                                                                                                                                                                                                                                                                                                                                                                                                                                                                             | 0,008   | 3695,0                      | 1768,2    | 2984,7      | 3780,3    | 1514,2      | -1,06                       |  |
| sp Q9H0H0 INT2_HUMAN    | Integrator complex subunit 2 OS=Homo sapiens OX=9606 GN=INTS2 PE=1 SV=2                 | snRNA 3'-end processing; snRNA processing; snRNA transcription by RNA polymerase II                                                                                                                                                                                                                                                                                                                                                                                                                                                                                                                                                                                                                                                                                                                                                                                                                                                                                                                                                                                                                                                                                                                                                                                                                                                                                                                                                                                                                                                                                                                                                                                                                                                                                                                                                                                                                                                                                                                                                                                                                                                                | 0,002   | 5561,2                      | 2767,0    | 3406,5      | 5858,2    | 2663,4      | -1,01                       |  |
| sp P09382 LEG1_HUMAN    | Galectin-1 OS=Homo sapiens OX=9606 GN=LGALS1 PE=1 SV=2                                  | carbohydrate binding; identical protein binding; lactose binding; laminin binding; RNA binding apoptotic process; cellular protein metabolic process; cellular response to glucose stimulus; cellular response to organic cyclic compound; myoblast differentiation; negative regulation of cell-substrate adhesion; negative regulation of neuron projection development; plasma cell differentiation; positive regulation of erythrocyte aggregation; positive regulation of I-kappaB kinase/NF-kappaB signaling; positive regulation of viral entry into host cell; post-translational protein modification; regulation of apoptotic process; response to axon injury; response to drug; response to isolation stress; T cell costimulation                                                                                                                                                                                                                                                                                                                                                                                                                                                                                                                                                                                                                                                                                                                                                                                                                                                                                                                                                                                                                                                                                                                                                                                                                                                                                                                                                                                                     | 0,000   | 42609,4                     | 7614,2    | 17767,9     | 43715,6   | 7357,6      | -2,48                       |  |
| sp P78417 GSTO1_HUMAN   | Glutathione S-transferase omega-1 OS=Homo sapiens OX=9606 GN=GSTO1 PE=1 SV=2            | glutathione dehydrogenase (ascorbate) activity; glutathione transferase activity; methylarsenate reductase activity; oxidoreductase activity cellular response to arsenic-containing substance; glutathione derivative biosynthetic process; glutathione metabolic process; interleukin-12-mediated signaling pathway; L-ascorbic acid metabolic process; methylation; negative regulation of ryanodine-sensitive calcium-release channel activity; positive regulation of ryanodine-sensitive calcium-release channel activity; positive regulation of skeletal muscle contraction by regulation of release of sequestered calcium ion; regulation of cardiac muscle contraction by regulation of the release of                                                                                                                                                                                                                                                                                                                                                                                                                                                                                                                                                                                                                                                                                                                                                                                                                                                                                                                                                                                                                                                                                                                                                                                                                                                                                                                                                                                                                                  | 0,000   | 54244,4                     | 12811,0   | 41800,8     | 51628,2   | 11358,4     | -2,08                       |  |

|                         |                                                                                          |                                                                                                                                                                                                                                                                                                                                                                                                                                                                                                                                                                                                                                                                                                                     |       |          |          |          |          |          |  |  |       |
|-------------------------|------------------------------------------------------------------------------------------|---------------------------------------------------------------------------------------------------------------------------------------------------------------------------------------------------------------------------------------------------------------------------------------------------------------------------------------------------------------------------------------------------------------------------------------------------------------------------------------------------------------------------------------------------------------------------------------------------------------------------------------------------------------------------------------------------------------------|-------|----------|----------|----------|----------|----------|--|--|-------|
|                         |                                                                                          | sequestered calcium ion; regulation of release of sequestered calcium ion into cytosol by sarcoplasmic reticulum; xenobiotic catabolic process                                                                                                                                                                                                                                                                                                                                                                                                                                                                                                                                                                      |       |          |          |          |          |          |  |  |       |
| sp Q9NPA0 EMC7_HUMAN    | ER membrane protein complex subunit 7 OS=Homo sapiens OX=9606 GN=EMC7 PE=1 SV=1          | carbohydrate binding; protein insertion into ER membrane by stop-transfer membrane-anchor sequence; tail-anchored membrane protein insertion into ER membrane; part of the endoplasmic reticulum membrane protein complex (EMC) that enables the energy-independent insertion into endoplasmic reticulum membranes of newly synthesized membrane proteins                                                                                                                                                                                                                                                                                                                                                           | 0,000 | 98207,5  | 23769,4  | 59332,4  | 106419,1 | 27504,3  |  |  | -2,05 |
| sp P00338 LDHA_HUMAN    | L-lactate dehydrogenase A chain OS=Homo sapiens OX=9606 GN=LDHA PE=1 SV=2                | L-lactate dehydrogenase activity; carbohydrate metabolic process; carboxylic acid metabolic process                                                                                                                                                                                                                                                                                                                                                                                                                                                                                                                                                                                                                 | 0,000 | 728496,5 | 221896,9 | 568446,7 | 728226,0 | 225622,6 |  |  | -1,72 |
| sp Q01628 IFM3_HUMAN    | Interferon-induced transmembrane protein 3 OS=Homo sapiens OX=9606 GN=IFITM3 PE=1 SV=2   | defense response to virus; immune response; negative regulation of viral entry into host cell; negative regulation of viral genome replication; negative regulation of viral transcription; response to interferon-alpha; response to interferon-beta; response to interferon-gamma; response to virus; type I interferon signaling pathway                                                                                                                                                                                                                                                                                                                                                                         | 0,001 | 6776,0   | 2249,2   | 6132,4   | 6805,8   | 1148,2   |  |  | -1,59 |
| sp O75056 SDC3_HUMAN    | Syndecan-3 OS=Homo sapiens OX=9606 GN=SDC3 PE=1 SV=2                                     | identical protein binding; cell migration; glycosaminoglycan biosynthetic process; glycosaminoglycan catabolic process; leukocyte migration; retinoid metabolic process; may have a role in the organization of cell shape by affecting the actin cytoskeleton, possibly by transferring signals from the cell surface in a sugar-dependent mechanism                                                                                                                                                                                                                                                                                                                                                               | 0,006 | 29250,0  | 11609,7  | 6666,0   | 29752,7  | 11238,0  |  |  | -1,33 |
| sp Q9H1A4 APC1_HUMAN    | Anaphase-promoting complex subunit 1 OS=Homo sapiens OX=9606 GN=ANAPC1 PE=1 SV=1         | molecular adaptor activity; anaphase-promoting complex-dependent catabolic process; cell division; metaphase/anaphase transition of mitotic cell cycle; protein K11-linked ubiquitination; regulation of exit from mitosis; regulation of mitotic cell cycle phase transition; ubiquitin-dependent protein catabolic process                                                                                                                                                                                                                                                                                                                                                                                        | 0,001 | 13038,2  | 5830,0   | 6525,8   | 13409,8  | 5737,5   |  |  | -1,16 |
| sp Q9H497-2 TOR3A_HUMAN | Isoform 2 of Torsin-3A OS=Homo sapiens OX=9606 GN=TOR3A                                  | ATP binding; ATPase activity                                                                                                                                                                                                                                                                                                                                                                                                                                                                                                                                                                                                                                                                                        | 0,004 | 9201,2   | 4179,3   | 5398,0   | 8838,6   | 3972,4   |  |  | -1,14 |
| sp P00491 PNPH_HUMAN    | Purine nucleoside phosphorylase OS=Homo sapiens OX=9606 GN=PNP PE=1 SV=2                 | guanosine phosphorylase activity; dAMP catabolic process                                                                                                                                                                                                                                                                                                                                                                                                                                                                                                                                                                                                                                                            | 0,007 | 68926,3  | 34322,0  | 40639,6  | 52149,7  | 34474,3  |  |  | -1,01 |
| sp P48539 PCP4_HUMAN    | Calmodulin regulator protein PCP4 OS=Homo sapiens OX=9606 GN=PCP4 PE=1 SV=3              | calcium ion binding; calmodulin binding; calmodulin dependent kinase signaling pathway; positive regulation of neuron differentiation                                                                                                                                                                                                                                                                                                                                                                                                                                                                                                                                                                               | 0,007 | 76299,6  | 33823,1  | 38857,0  | 78335,5  | 41455,1  |  |  | -1,17 |
| sp Q9584 S10AD_HUMAN    | Protein S100-A13 OS=Homo sapiens OX=9606 GN=S100A13 PE=1 SV=1                            | calcium-dependent protein binding; calcium ion binding; copper ion binding; fibroblast growth factor binding; lipid binding; protein homodimerization activity; RAGE receptor binding; zinc ion binding; mast cell degranulation; positive regulation of cell population proliferation; positive regulation of cytokine production; positive regulation of I-kappaB kinase/NF-kappaB signaling; positive regulation of interleukin-1 alpha production; protein transport; regulation of cell shape; response to copper ion; response to electrical stimulus                                                                                                                                                         | 0,000 | 44553,1  | 16816,7  | 42855,2  | 45934,5  | 17453,9  |  |  | -1,41 |
| sp P04271 S100B_HUMAN   | Protein S100-B OS=Homo sapiens OX=9606 GN=S100B PE=1 SV=2                                | Calcium-dependent protein binding; calcium ion binding; identical protein binding; protein homodimerization activity; RAGE receptor binding; S100 protein binding; tau protein binding; zinc ion binding axonogenesis; central nervous system development; innate immune response; learning or memory; positive regulation of cell population proliferation; positive regulation of I-kappaB kinase/NF-kappaB signaling                                                                                                                                                                                                                                                                                             | 0,000 | 4858,3   | 1181,2   | 1452,5   | 5091,4   | 913,5    |  |  | -2,04 |
| sp P07602-3 SAP_HUMAN   | Isoform Sap-mu-9 of Prosaposin OS=Homo sapiens OX=9606 GN=PSAP                           | identical protein binding; phospholipid binding; protease binding; protein homodimerization activity; enzyme activator activity; adenylate cyclase-inhibiting G protein-coupled receptor signaling pathway; epithelial cell differentiation involved in prostate gland development; ganglioside GM1 transport to membrane; glycosphingolipid metabolic process; G protein-coupled receptor signaling pathway; lysosomal transport; neutrophil degranulation; platelet degranulation; positive regulation of beta-galactosidase activity; prostate gland growth; regulation of autophagy; regulation of lipid metabolic process                                                                                      | 0,008 | 121325,2 | 48654,8  | 60125,4  | 122082,2 | 47824,0  |  |  | -1,32 |
| sp Q9NR46 SHLB2_HUMAN   | Endophilin-B2 OS=Homo sapiens OX=9606 GN=SH3GLB2 PE=1 SV=1                               | Cadherin binding; identical protein binding                                                                                                                                                                                                                                                                                                                                                                                                                                                                                                                                                                                                                                                                         | 0,000 | 29053,1  | 6385,6   | 7041,0   | 26340,0  | 4314,2   |  |  | -2,19 |
| sp P07951-2 TPM2_HUMAN  | Isoform 2 of Tropomyosin beta chain OS=Homo sapiens OX=9606 GN=TPM2                      | actin binding; actin filament binding; identical protein binding; protein heterodimerization activity; protein homodimerization activity; structural constituent of muscle; actin filament organization; muscle contraction ; muscle filament sliding; regulation of ATPase activity                                                                                                                                                                                                                                                                                                                                                                                                                                | 0,000 | 20198,9  | 5246,2   | 12062,3  | 20606,7  | 3876,3   |  |  | -1,94 |
| sp P20810-6 ICAL_HUMAN  | Isoform 6 of Calpastatin OS=Homo sapiens OX=9606 GN=CAST                                 | cadherin binding; calcium-dependent cysteine-type endopeptidase inhibitor activity; endopeptidase inhibitor activity; RNA binding inhibition of cysteine-type endopeptidase activity; negative regulation of type B; pancreatic cell apoptotic process; presynaptic active zone organization                                                                                                                                                                                                                                                                                                                                                                                                                        | 0,001 | 6050,0   | 1722,6   | 4798,6   | 6818,9   | 860,0    |  |  | -1,81 |
| sp O15143 ARC1B_HUMAN   | Actin-related protein 2/3 complex subunit 1B OS=Homo sapiens OX=9606 GN=ARPC1B PE=1 SV=3 | Arp2/3 complex-mediated actin nucleation; ephrin receptor signaling pathway; Fc-gamma receptor signaling pathway involved in phagocytosis; response to estradiol; response to estrogen; actin binding; structural constituent of cytoskeleton                                                                                                                                                                                                                                                                                                                                                                                                                                                                       | 0,000 | 19370,0  | 5806,3   | 9225,2   | 17823,9  | 5933,2   |  |  | -1,74 |
| sp P05413 FABPH_HUMAN   | Fatty acid-binding protein, heart OS=Homo sapiens OX=9606 GN=FABP3 PE=1 SV=4             | cytoskeletal protein binding; icosatetraenoic acid binding; long-chain fatty acid binding; long-chain fatty acid transporter activity; oleic acid binding brown fat cell differentiation; cholesterol homeostasis; fatty acid metabolic process; intracellular lipid transport; long-chain fatty acid transport; negative regulation of cell population proliferation; phospholipid homeostasis; positive regulation of long-chain fatty acid import into cell; positive regulation of phospholipid biosynthetic process; regulation of fatty acid oxidation; regulation of phosphatidylcholine biosynthetic process; response to drug; response to fatty acid; response to insulin; triglyceride catabolic process | 0,000 | 35322,0  | 11533,1  | 9372,6   | 33570,8  | 9986,9   |  |  | -1,61 |
| sp P13797 PLST_HUMAN    | Plastin-3 OS=Homo sapiens OX=9606 GN=PLS3 PE=1 SV=4                                      | actin filament binding; calcium ion binding actin filament bundle assembly; actin filament network formation; bone development                                                                                                                                                                                                                                                                                                                                                                                                                                                                                                                                                                                      | 0,000 | 128506,5 | 51227,6  | 150688,1 | 146194,4 | 48804,9  |  |  | -1,33 |
| sp Q05682-5 CALD1_HUMAN | Isoform 5 of Caldesmon OS=Homo sapiens OX=9606 GN=CALD1                                  | actin binding; cadherin binding; calmodulin binding; myosin binding; tropomyosin binding; actin filament bundle assembly; angiogenesis; muscle contraction                                                                                                                                                                                                                                                                                                                                                                                                                                                                                                                                                          | 0,000 | 31728,9  | 13931,4  | 29765,1  | 28902,0  | 12843,1  |  |  | -1,19 |
| sp P09493-4 TPM1_HUMAN  | Isoform 4 of Tropomyosin alpha-1 chain OS=Homo sapiens OX=9606 GN=TPM1                   | actin binding; actin filament binding ; cytoskeletal protein binding; identical protein binding; protein heterodimerization activity; protein homodimerization activity; structural constituent of cytoskeleton; structural constituent of muscle                                                                                                                                                                                                                                                                                                                                                                                                                                                                   | 0,000 | 59520,2  | 26441,3  | 32966,9  | 58235,6  | 27690,7  |  |  | -1,17 |
| sp P06396-2 GELS_HUMAN  | Isoform 2 of Gelsolin OS=Homo sapiens OX=9606 GN=GSN                                     | actin binding; calcium ion binding; myosin II binding; phosphatidylinositol 3-kinase catalytic subunit binding; phosphatidylinositol-4,5-bisphosphate binding; actin filament capping; actin filament depolymerization; actin filament polymerization; actin filament reorganization; actin filament severing; actin nucleation; aging; amyloid fibril formation; cardiac muscle cell contraction; cell projection                                                                                                                                                                                                                                                                                                  | 0,000 | 108015,2 | 50728,5  | 100901,0 | 100845,1 | 52184,5  |  |  | -1,09 |



|                         |                                                                                      |                                                                                                                                                                                                                                                                                                                                                                                                                                                                                                                                                                                                                                                                                                                                                                                                                                                                                                                                                                                                                                                                                            |       |         |         |         |         |         |       |
|-------------------------|--------------------------------------------------------------------------------------|--------------------------------------------------------------------------------------------------------------------------------------------------------------------------------------------------------------------------------------------------------------------------------------------------------------------------------------------------------------------------------------------------------------------------------------------------------------------------------------------------------------------------------------------------------------------------------------------------------------------------------------------------------------------------------------------------------------------------------------------------------------------------------------------------------------------------------------------------------------------------------------------------------------------------------------------------------------------------------------------------------------------------------------------------------------------------------------------|-------|---------|---------|---------|---------|---------|-------|
|                         |                                                                                      | assembly; cellular response to cadmium ion; cellular response to interferon-gamma; central nervous system development; cilium assembly; negative regulation of viral entry into host cell; neutrophil degranulation; oligodendrocyte development; phagocytosis, engulfment; phosphatidylinositol-mediated signaling; positive regulation of actin nucleation; positive regulation of cysteine-type endopeptidase activity involved in apoptotic signaling pathway; positive regulation of gene expression; positive regulation of keratinocyte apoptotic process; positive regulation of protein processing in phagocytic vesicle; protein destabilization; regulation of cell adhesion; regulation of establishment of T cell polarity; regulation of plasma membrane raft polarization; regulation of podosome assembly; regulation of receptor clustering; relaxation of cardiac muscle; renal protein absorption; response to ethanol; response to folic acid; response to muscle stretch; sequestering of actin monomers; striated muscle atrophy; tissue regeneration; wound healing |       |         |         |         |         |         |       |
| sp P02545 LMNA_HUMAN    | Prelamin-A/C OS=Homo sapiens OX=9606 GN=LMNA PE=1 SV=1                               | identical protein binding; structural molecule activity; cellular protein localization; cellular response to hypoxia; DNA double-strand break attachment to nuclear envelope; establishment or maintenance of microtubule; cytoskeleton polarity; IRE1-mediated unfolded protein response; mitotic nuclear envelope reassembly; muscle organ development; negative regulation of cardiac muscle hypertrophy in response to stress; negative regulation of cell population proliferation; nuclear envelope organization; positive regulation of cell aging; protein localization to nucleus; regulation of cell migration; regulation of telomere maintenance; nuclear assembly; chromatin organization, nuclear membrane and telomere dynamics; required for normal development of peripheral nervous system and skeletal muscle and for muscle satellite cell proliferation                                                                                                                                                                                                               | 0,000 | 50695,3 | 24063,7 | 24589,4 | 46463,5 | 23290,2 | -1,07 |
| sp Q9NUM4 T106B_HUMAN   | Transmembrane protein 106B OS=Homo sapiens OX=9606 GN=TMEM106B PE=1 SV=2             | dendrite morphogenesis and branching; lysosomal transport; lysosome localization; lysosome organization                                                                                                                                                                                                                                                                                                                                                                                                                                                                                                                                                                                                                                                                                                                                                                                                                                                                                                                                                                                    | 0,003 | 11092,9 | 5332,1  | 7955,7  | 10581,2 | 4901,5  | -1,06 |
| sp Q15063-5 POSTN_HUMAN | Isoform 5 of Periostin OS=Homo sapiens OX=9606 GN=POSTN                              | cell adhesion molecule binding; heparin binding; metal ion binding; bone regeneration; cell adhesion; cellular response to fibroblast growth factor stimulus; cellular response to transforming growth factor beta; cellular response to tumor necrosis factor; cellular response to vitamin K; extracellular matrix organization; negative regulation of cell-matrix adhesion; negative regulation of substrate adhesion-dependent cell spreading; neuron projection extension; positive regulation of chemokine (C-X-C motif) ligand 2 production; positive regulation of smooth muscle cell migration; regulation of Notch signaling pathway; regulation of systemic arterial blood pressure; response to hypoxia; response to mechanical stimulus; response to muscle activity; tissue development; wound healing                                                                                                                                                                                                                                                                      | 0,000 | 52190,0 | 25267,4 | 83386,8 | 52547,3 | 18971,6 | -1,05 |
| sp Q43491-2 E41L2_HUMAN | Isoform 2 of Band 4.1-like protein 2 OS=Homo sapiens OX=9606 GN=EPB41L2              | actin binding; PH domain binding; spectrin binding; structural molecule activity; actomyosin structure organization; cell cycle; cell division; cortical actin cytoskeleton organization; positive regulation of protein localization to cell cortex                                                                                                                                                                                                                                                                                                                                                                                                                                                                                                                                                                                                                                                                                                                                                                                                                                       | 0,000 | 34255,4 | 17115,9 | 34051,0 | 34673,3 | 16833,9 | -1,00 |
| sp Q15427 MOT4_HUMAN    | Monocarboxylate transporter 4 OS=Homo sapiens OX=9606 GN=SLC16A3 PE=1 SV=1           | lactate transmembrane transporter activity; monocarboxylic acid transmembrane transporter activity; RNA binding; symporter activity leukocyte migration; monocarboxylic acid transport; plasma membrane lactate transport; pyruvate metabolic process                                                                                                                                                                                                                                                                                                                                                                                                                                                                                                                                                                                                                                                                                                                                                                                                                                      | 0,001 | 16322,5 | 5038,0  | 9766,9  | 16549,7 | 3905,9  | -1,70 |
| sp Q96ER9 CCDC51_HUMAN  | Coiled-coil domain-containing protein 51 OS=Homo sapiens OX=9606 GN=CCDC51 PE=1 SV=2 | mitochondrial ATP-gated potassium channel activity; potassium ion transmembrane transport; may contribute to the homeostatic control of cellular metabolism under stress conditions by regulating the mitochondrial matrix volume                                                                                                                                                                                                                                                                                                                                                                                                                                                                                                                                                                                                                                                                                                                                                                                                                                                          | 0,003 | 10002,8 | 4990,9  | 6763,4  | 10016,5 | 4178,0  | -1,00 |

**DIFFERENTIALLY EXPRESSED PROTEINS – FRDA vs ISO CT**

**UPREGULATED**

| PROTEIN                 | GROUP AND RELATED GENE (GN)                                                                     | GO: BIOLOGICAL FUNCTION                                                                                                                                                                                                                                                                                                                                                                                                                                                                                                                                                                                                                                                                                                                                                                                                                                                                                                                                                                               | P-value | Protein Mean Peak Intensity |           |          |               |             | Log <sub>2</sub> FC FRDA/ ISO CT |
|-------------------------|-------------------------------------------------------------------------------------------------|-------------------------------------------------------------------------------------------------------------------------------------------------------------------------------------------------------------------------------------------------------------------------------------------------------------------------------------------------------------------------------------------------------------------------------------------------------------------------------------------------------------------------------------------------------------------------------------------------------------------------------------------------------------------------------------------------------------------------------------------------------------------------------------------------------------------------------------------------------------------------------------------------------------------------------------------------------------------------------------------------------|---------|-----------------------------|-----------|----------|---------------|-------------|----------------------------------|
|                         |                                                                                                 |                                                                                                                                                                                                                                                                                                                                                                                                                                                                                                                                                                                                                                                                                                                                                                                                                                                                                                                                                                                                       |         | Mean ISO CT                 | Mean FRDA | Mean CT  | Median ISO CT | Median FRDA |                                  |
| sp Q96MU7-2 YTDC1_HUMAN | Isoform 2 of YTH domain-containing protein 1 OS=Homo sapiens OX=9606 GN=YTDC1                   | dosage compensation by inactivation of X chromosome; mRNA export from the nucleus; mRNA splicing, via spliceosome; posttranscriptional regulation of gene expression                                                                                                                                                                                                                                                                                                                                                                                                                                                                                                                                                                                                                                                                                                                                                                                                                                  | 0,000   | 3945,5                      | 8453,7    | 16266,7  | 4221,9        | 8767,0      | 1,10                             |
| sp Q9HCJ6 VAT1L_HUMAN   | Synaptic vesicle membrane protein VAT-1 homolog-like OS=Homo sapiens OX=9606 GN=VAT1L PE=1 SV=2 | oxidoreductase activity; zinc ion binding                                                                                                                                                                                                                                                                                                                                                                                                                                                                                                                                                                                                                                                                                                                                                                                                                                                                                                                                                             | 0,000   | 75389,8                     | 153541,5  | 89811,6  | 85987,6       | 168354,1    | 1,03                             |
| sp Q43301 HS12A_HUMAN   | Heat shock 70 kDa protein 12A OS=Homo sapiens OX=9606 GN=HSPA12A PE=1 SV=2                      | ATP binding                                                                                                                                                                                                                                                                                                                                                                                                                                                                                                                                                                                                                                                                                                                                                                                                                                                                                                                                                                                           | 0,000   | 57363,0                     | 117513,2  | 75095,8  | 54891,2       | 106579,2    | 1,03                             |
| sp Q6PCE3 PGM2L_HUMAN   | Glucose 1,6-bisphosphate synthase OS=Homo sapiens OX=9606 GN=PGM2L1 PE=1 SV=3                   | glucose-1,6-bisphosphate synthase activity; intramolecular transferase activity, phosphotransferases; galactose catabolic process; glucose 6-phosphate metabolic process; glucose metabolic process; glycogen biosynthetic process; glycogen catabolic process                                                                                                                                                                                                                                                                                                                                                                                                                                                                                                                                                                                                                                                                                                                                        | 0,002   | 77243,3                     | 158411,6  | 129424,1 | 70848,5       | 145826,2    | 1,04                             |
| sp P04040 CATA_HUMAN    | Catalase OS=Homo sapiens OX=9606 GN=CAT PE=1 SV=3                                               | cellular response to growth factor stimulus; cellular response to oxidative stress; cholesterol metabolic process; negative regulation of apoptotic process; response to hypoxia; antioxidant activity                                                                                                                                                                                                                                                                                                                                                                                                                                                                                                                                                                                                                                                                                                                                                                                                | 0,003   | 30772,1                     | 63429,7   | 54048,4  | 31104,6       | 61985,0     | 1,04                             |
| sp Q05639 EF1A2_HUMAN   | Elongation factor 1-alpha 2 OS=Homo sapiens OX=9606 GN=EEF1A2 PE=1 SV=1                         | positive regulation of apoptotic process; positive regulation of lipid kinase activity; regulation of chaperone-mediated autophagy; response to electrical stimulus; translation; translation elongation                                                                                                                                                                                                                                                                                                                                                                                                                                                                                                                                                                                                                                                                                                                                                                                              | 0,000   | 21916,3                     | 45294,8   | 32298,4  | 21960,5       | 48219,7     | 1,05                             |
| sp P05067-3 A4_HUMAN    | Isoform L-APP677 of Amyloid-beta precursor protein OS=Homo sapiens OX=9606 GN=APP               | acetylcholine receptor activator activity; chaperone; chemoattractant activity; chromatin binding; DNA binding; enzyme binding; enzyme binding; G protein-coupled receptor binding; growth factor receptor binding; heparan sulfate binding; integrin binding; activation of MAPK activity; adult locomotory behavior; axo-dendritic transport; axon midline choice point recognition; axonogenesis; calcium-mediated signaling; cell adhesion; cellular copper ion homeostasis; cellular process; cellular protein metabolic process; cellular response to amyloid-beta; cellular response to cAMP; dendrite development; endocytosis; extracellular matrix organization; locomotory behavior; modulation of excitatory postsynaptic potential; negative regulation of gene expression; negative regulation of long-term synaptic potentiation; negative regulation of mitochondrion organization; negative regulation of neuron death; neuromuscular process controlling balance; neuron projection | 0,000   | 33268,8                     | 69069,6   | 79564,4  | 30510,9       | 67344,0     | 1,05                             |

|                         |                                                                                                           |                                                                                                                                                                                                                                                                                                                                                                                                                                                                                                                                                                                                                                                                                                                                                                                                                                                                                                                                                                                                                                                                                                                                                                                                                                                                                                                                                                                                                                                                                                                                                                                                                                                                                                                                                                           |       |           |           |           |           |           |      |  |  |
|-------------------------|-----------------------------------------------------------------------------------------------------------|---------------------------------------------------------------------------------------------------------------------------------------------------------------------------------------------------------------------------------------------------------------------------------------------------------------------------------------------------------------------------------------------------------------------------------------------------------------------------------------------------------------------------------------------------------------------------------------------------------------------------------------------------------------------------------------------------------------------------------------------------------------------------------------------------------------------------------------------------------------------------------------------------------------------------------------------------------------------------------------------------------------------------------------------------------------------------------------------------------------------------------------------------------------------------------------------------------------------------------------------------------------------------------------------------------------------------------------------------------------------------------------------------------------------------------------------------------------------------------------------------------------------------------------------------------------------------------------------------------------------------------------------------------------------------------------------------------------------------------------------------------------------------|-------|-----------|-----------|-----------|-----------|-----------|------|--|--|
|                         |                                                                                                           | development; neuron projection maintenance; neuron remodeling; synapse organization; synaptic growth at neuromuscular junction                                                                                                                                                                                                                                                                                                                                                                                                                                                                                                                                                                                                                                                                                                                                                                                                                                                                                                                                                                                                                                                                                                                                                                                                                                                                                                                                                                                                                                                                                                                                                                                                                                            |       |           |           |           |           |           |      |  |  |
| sp P60953-1 CDC42_HUMAN | Isoform 1 of Cell division control protein 42 homolog OS=Homo sapiens OX=9606 GN=CDC42                    | G protein activity; GTPase activity; GTP binding; GTP-dependent protein binding; identical protein binding; mitogen-activated protein kinase kinase binding; protein kinase binding; thioesterase binding; ubiquitin protein ligase activity; actin cytoskeleton organization; actin filament branching; actin filament organization; adherens junction organization; cardiac conduction system development; Cdc42 protein signal transduction; cell migration; cell projection assembly; cellular protein localization; cellular response to interferon-gamma; dendritic cell migration; dendritic spine morphogenesis; endocytosis; establishment of Golgi localization; establishment or maintenance of cell polarity; Fc-gamma receptor signaling pathway involved in phagocytosis; filopodium assembly; Golgi organization; heart contraction; integrin-mediated signaling pathway; modification of synaptic structure; negative regulation of epidermal growth factor receptor signaling pathway; negative regulation of protein-containing complex assembly; neuron fate determination; neuropilin signaling pathway; nuclear migration; organelle transport along microtubule; positive regulation of filopodium assembly; positive regulation of intracellular protein transport; positive regulation of lamellipodium assembly; positive regulation of muscle cell differentiation; positive regulation of neuron apoptotic process; positive regulation of stress fiber assembly; positive regulation of substrate adhesion-dependent cell spreading; positive regulation of synapse structural plasticity; regulation of attachment of spindle microtubules to kinetochore; viral RNA genome replication; Wnt signaling pathway, planar cell polarity pathway | 0,003 | 8752,9    | 18426,8   | 8005,6    | 7597,3    | 21819,9   | 1,07 |  |  |
| sp Q9UHG2 PCSK1_HUMAN   | ProSAS OS=Homo sapiens OX=9606 GN=PCSK1N PE=1 SV=1                                                        | neuropeptide signaling pathway; endopeptidase inhibitor activity                                                                                                                                                                                                                                                                                                                                                                                                                                                                                                                                                                                                                                                                                                                                                                                                                                                                                                                                                                                                                                                                                                                                                                                                                                                                                                                                                                                                                                                                                                                                                                                                                                                                                                          | 0,000 | 99290,2   | 219291,2  | 169430,5  | 83346,9   | 236706,5  | 1,14 |  |  |
| sp Q15125 EBP_HUMAN     | 3-beta-hydroxysteroid-Delta(8),Delta(7)-isomerase OS=Homo sapiens OX=9606 GN=EBP PE=1 SV=3                | cholesterol biosynthetic process; cholesterol metabolic process; skeletal system development                                                                                                                                                                                                                                                                                                                                                                                                                                                                                                                                                                                                                                                                                                                                                                                                                                                                                                                                                                                                                                                                                                                                                                                                                                                                                                                                                                                                                                                                                                                                                                                                                                                                              | 0,002 | 4857,6    | 11475,3   | 13202,2   | 4735,5    | 12372,6   | 1,24 |  |  |
| sp Q9UJX2 CDC23_HUMAN   | Cell division cycle protein 23 homolog OS=Homo sapiens OX=9606 GN=CDC23 PE=1 SV=3                         | ubiquitin-protein transferase activity; anaphase-promoting complex-dependent catabolic process; cell division                                                                                                                                                                                                                                                                                                                                                                                                                                                                                                                                                                                                                                                                                                                                                                                                                                                                                                                                                                                                                                                                                                                                                                                                                                                                                                                                                                                                                                                                                                                                                                                                                                                             | 0,002 | 6416,0    | 15171,1   | 12493,9   | 6898,5    | 15424,3   | 1,24 |  |  |
| sp Q86W56-4 PARG_HUMAN  | Isoform 4 of Poly(ADP-ribose) glycohydrolase OS=Homo sapiens OX=9606 GN=PARG                              | poly(ADP-ribose) glycohydrolase activity; ATP generation from poly-ADP-D-ribose; base-excision repair; gap-filling; carbohydrate metabolic process; nucleotide-sugar metabolic process; regulation of DNA repair; regulation of histone modification                                                                                                                                                                                                                                                                                                                                                                                                                                                                                                                                                                                                                                                                                                                                                                                                                                                                                                                                                                                                                                                                                                                                                                                                                                                                                                                                                                                                                                                                                                                      | 0,004 | 8766,8    | 21685,1   | 6888,5    | 3421,7    | 24338,9   | 1,31 |  |  |
| sp Q7L7X3 TAOK1_HUMAN   | Serine/threonine-protein kinase TAO1 OS=Homo sapiens OX=9606 GN=TAOK1 PE=1 SV=1                           | tubulin binding; protein kinase activity; DNA repair; microtubule cytoskeleton organization; mitotic spindle organization; neuron projection morphogenesis; regulation of actin cytoskeleton organization; regulation of microtubule cytoskeleton organization                                                                                                                                                                                                                                                                                                                                                                                                                                                                                                                                                                                                                                                                                                                                                                                                                                                                                                                                                                                                                                                                                                                                                                                                                                                                                                                                                                                                                                                                                                            | 0,004 | 25920,7   | 65189,6   | 36856,9   | 18497,0   | 72282,0   | 1,33 |  |  |
| sp P17252 KPCA_HUMAN    | Protein kinase C alpha type OS=Homo sapiens OX=9606 GN=PRKCA PE=1 SV=4                                    | ATP binding; calcium-dependent protein kinase C activity; enzyme binding; integrin binding; protein kinase activity; apoptotic signaling pathway; axon guidance; cell adhesion; intracellular signal transduction; positive regulation of cardiac muscle hypertrophy; positive regulation of cell adhesion; positive regulation of ERK1 and ERK2 cascade                                                                                                                                                                                                                                                                                                                                                                                                                                                                                                                                                                                                                                                                                                                                                                                                                                                                                                                                                                                                                                                                                                                                                                                                                                                                                                                                                                                                                  | 0,002 | 5216,4    | 13320,6   | 7554,7    | 4863,3    | 15984,1   | 1,35 |  |  |
| sp Q8WV17 PPR1C_HUMAN   | Protein phosphatase 1 regulatory subunit 1C OS=Homo sapiens OX=9606 GN=PPP1R1C PE=3 SV=1                  | protein phosphatase inhibitor activity; intracellular signal transduction; cell cycle; cell division                                                                                                                                                                                                                                                                                                                                                                                                                                                                                                                                                                                                                                                                                                                                                                                                                                                                                                                                                                                                                                                                                                                                                                                                                                                                                                                                                                                                                                                                                                                                                                                                                                                                      | 0,001 | 14664,0   | 39211,4   | 43879,7   | 10588,7   | 38670,9   | 1,42 |  |  |
| sp Q5R115 COX20_HUMAN   | Cytochrome c oxidase assembly protein COX20, mitochondrial OS=Homo sapiens OX=9606 GN=COX20 PE=1 SV=2     | mitochondrial cytochrome c oxidase assembly                                                                                                                                                                                                                                                                                                                                                                                                                                                                                                                                                                                                                                                                                                                                                                                                                                                                                                                                                                                                                                                                                                                                                                                                                                                                                                                                                                                                                                                                                                                                                                                                                                                                                                                               | 0,009 | 2947,2    | 10087,9   | 10517,7   | 1673,7    | 8871,8    | 1,78 |  |  |
| sp Q9UGI8 TES_HUMAN     | Testin OS=Homo sapiens OX=9606 GN=TES PE=1 SV=1                                                           | cadherin binding; RNA binding; negative regulation of cell population proliferation; may play a role in cell adhesion, cell spreading and in the reorganization of the actin cytoskeleton                                                                                                                                                                                                                                                                                                                                                                                                                                                                                                                                                                                                                                                                                                                                                                                                                                                                                                                                                                                                                                                                                                                                                                                                                                                                                                                                                                                                                                                                                                                                                                                 | 0,000 | 10767,2   | 40885,9   | 45960,6   | 9723,2    | 40036,8   | 1,92 |  |  |
| sp O14639-2 ABL1_HUMAN  | Isoform 2 of Actin-binding LIM protein 1 OS=Homo sapiens OX=9606 GN=ABL1M1                                | actin binding; cytoskeleton organization; animal organ morphogenesis                                                                                                                                                                                                                                                                                                                                                                                                                                                                                                                                                                                                                                                                                                                                                                                                                                                                                                                                                                                                                                                                                                                                                                                                                                                                                                                                                                                                                                                                                                                                                                                                                                                                                                      | 0,001 | 7838,7    | 15892,2   | 13327,7   | 7255,2    | 13520,5   | 1,02 |  |  |
| sp Q02410-2 APBA1_HUMAN | Isoform 2 of Amyloid-beta A4 precursor protein-binding family A member 1 OS=Homo sapiens OX=9606 GN=APBA1 | axo-dendritic transport; cell adhesion; chemical synaptic transmission; gamma-aminobutyric acid secretion; glutamate secretion; intracellular protein transport; in utero embryonic development; locomotory behavior; multicellular organism growth; nervous system development; neurotransmitter transport; protein-containing complex assembly; regulation of gene expression; regulation of synaptic vesicle exocytosis                                                                                                                                                                                                                                                                                                                                                                                                                                                                                                                                                                                                                                                                                                                                                                                                                                                                                                                                                                                                                                                                                                                                                                                                                                                                                                                                                | 0,009 | 1878,5    | 3828,4    | 3679,8    | 1196,0    | 4287,1    | 1,03 |  |  |
| sp P07196 NFL_HUMAN     | Neurofilament light polypeptide OS=Homo sapiens OX=9606 GN=NEFL PE=1 SV=3                                 | protein binding; phospholipase binding; structural constituent of cytoskeleton; structural constituent of postsynaptic intermediate filament cytoskeleton; anterograde axonal transport; axonal transport of mitochondrion; intermediate filament organization; intermediate filament polymerization or depolymerization; locomotion; MAPK cascade; microtubule cytoskeleton organization; negative regulation of neuron apoptotic process; neurofilament bundle assembly; neurofilament cytoskeleton organization; neuromuscular process controlling balance; neuron projection morphogenesis; peripheral nervous system axon regeneration; positive regulation of axonogenesis; protein polymerization; regulation of axon diameter; regulation of NMDA receptor activity; response to acrylamide; response to corticosterone; response to peptide hormone; response to sodium arsenite; response to toxic substance; retrograde axonal transport; spinal cord development; synapse maturation                                                                                                                                                                                                                                                                                                                                                                                                                                                                                                                                                                                                                                                                                                                                                                          | 0,001 | 2300996,1 | 4732646,2 | 7321839,6 | 1986276,0 | 3747057,2 | 1,04 |  |  |
| sp Q12860 CNTN1_HUMAN   | Contactin-1 OS=Homo sapiens OX=9606 GN=CNTN1 PE=1 SV=1                                                    | carbohydrate binding; cell adhesion; cerebellum development; neuron projection development; positive regulation of sodium ion transport                                                                                                                                                                                                                                                                                                                                                                                                                                                                                                                                                                                                                                                                                                                                                                                                                                                                                                                                                                                                                                                                                                                                                                                                                                                                                                                                                                                                                                                                                                                                                                                                                                   | 0,000 | 97306,6   | 202911,5  | 165656,2  | 106492,8  | 209852,8  | 1,06 |  |  |
| sp Q9UDT6 CLIP2_HUMAN   | CAP-Gly domain-containing linker protein 2 OS=Homo sapiens OX=9606 GN=CLIP2 PE=1 SV=1                     | cytoplasmic microtubule organization                                                                                                                                                                                                                                                                                                                                                                                                                                                                                                                                                                                                                                                                                                                                                                                                                                                                                                                                                                                                                                                                                                                                                                                                                                                                                                                                                                                                                                                                                                                                                                                                                                                                                                                                      | 0,002 | 27022,7   | 56784,0   | 49352,5   | 16534,7   | 56345,1   | 1,07 |  |  |
| sp P78310 CXAR_HUMAN    | Coxsackievirus and adenovirus receptor OS=Homo sapiens OX=9606 GN=CXADR PE=1 SV=1                         | cell adhesion molecule binding; beta-catenin binding; actin cytoskeleton reorganization; AV node cell-bundle of His cell adhesion involved in cell communication; AV node cell to bundle of His cell communication; cardiac muscle fiber development; cell-cell junction organization; heart development; heterophilic cell-cell adhesion via plasma membrane cell adhesion molecules; homotypic cell-cell adhesion; regulation of AV node cell action potential; mitochondrion organization                                                                                                                                                                                                                                                                                                                                                                                                                                                                                                                                                                                                                                                                                                                                                                                                                                                                                                                                                                                                                                                                                                                                                                                                                                                                              | 0,000 | 121187,0  | 255101,9  | 188907,3  | 123193,0  | 249588,0  | 1,07 |  |  |
| sp Q9Y6R0 NUMBL_HUMAN   | Numb-like protein OS=Homo sapiens OX=9606 GN=NUMBL PE=1 SV=1                                              | adherens junction organization; axonogenesis; cytokine-mediated signaling pathway; lateral ventricle development; nervous system development; positive regulation of neurogenesis                                                                                                                                                                                                                                                                                                                                                                                                                                                                                                                                                                                                                                                                                                                                                                                                                                                                                                                                                                                                                                                                                                                                                                                                                                                                                                                                                                                                                                                                                                                                                                                         | 0,003 | 9418,8    | 20118,9   | 17084,1   | 7112,2    | 20772,1   | 1,09 |  |  |

|                         |                                                                                                                  |                                                                                                                                                                                                                                                                                                                                                                                                                                                                                                                                                                                                                                                                                                                                                                                                                                                                                         |       |          |          |          |          |          |      |
|-------------------------|------------------------------------------------------------------------------------------------------------------|-----------------------------------------------------------------------------------------------------------------------------------------------------------------------------------------------------------------------------------------------------------------------------------------------------------------------------------------------------------------------------------------------------------------------------------------------------------------------------------------------------------------------------------------------------------------------------------------------------------------------------------------------------------------------------------------------------------------------------------------------------------------------------------------------------------------------------------------------------------------------------------------|-------|----------|----------|----------|----------|----------|------|
| sp P31146 COR1A_HUMAN   | Coronin-1A OS=Homo sapiens OX=9606 GN=CORO1A PE=1 SV=4                                                           | actin binding; actin filament binding; actin monomer binding; cytoskeletal protein binding; myosin heavy chain binding; actin cytoskeleton organization; actin filament organization; calcium ion transport; cell-substrate adhesion; negative regulation of neuron apoptotic process; negative regulation of vesicle fusion                                                                                                                                                                                                                                                                                                                                                                                                                                                                                                                                                            | 0,000 | 49341,0  | 107414,9 | 92671,3  | 39579,1  | 119923,2 | 1,12 |
| sp Q93045-2 STMN2_HUMAN | Isoform 2 of Stathmin-2 OS=Homo sapiens OX=9606 GN=STMN2                                                         | calcium-dependent protein binding; tubulin binding; cellular response to nerve growth factor stimulus; microtubule depolymerization; negative regulation of microtubule depolymerization; negative regulation of microtubule polymerization; negative regulation of neuron projection development; neuron projection development; positive regulation of microtubule depolymerization; positive regulation of neuron projection development; regulation of microtubule polymerization or depolymerization                                                                                                                                                                                                                                                                                                                                                                               | 0,000 | 19646,8  | 43423,5  | 23141,8  | 19731,8  | 41561,3  | 1,14 |
| sp Q9H4G0 E41L1_HUMAN   | Band 4.1-like protein 1 OS=Homo sapiens OX=9606 GN=EPB41L1 PE=1 SV=2                                             | actin binding; structural molecule activity; actomyosin structure organization; actin cytoskeleton organization                                                                                                                                                                                                                                                                                                                                                                                                                                                                                                                                                                                                                                                                                                                                                                         | 0,000 | 37100,4  | 84858,3  | 57427,8  | 35669,8  | 76778,8  | 1,19 |
| sp Q99719 SEPT5_HUMAN   | Septin-5 OS=Homo sapiens OX=9606 GN=SEPTIN5 PE=1 SV=1                                                            | GTPase activity; structure molecule activity; adult behavior; cellular protein localization; cytoskeleton-dependent cytokinesis; regulation of exocytosis; regulation of synaptic vesicle exocytosis; social behavior; synaptic vesicle targeting                                                                                                                                                                                                                                                                                                                                                                                                                                                                                                                                                                                                                                       | 0,000 | 57280,1  | 131721,2 | 110599,9 | 58600,3  | 129382,9 | 1,20 |
| sp Q6UXK2 ISLR2_HUMAN   | Immunoglobulin superfamily containing leucine-rich repeat protein 2 OS=Homo sapiens OX=9606 GN=ISLR2 PE=2 SV=1   | positive regulation of axon extension                                                                                                                                                                                                                                                                                                                                                                                                                                                                                                                                                                                                                                                                                                                                                                                                                                                   | 0,000 | 43179,1  | 100245,9 | 61334,5  | 49339,3  | 94547,6  | 1,22 |
| sp P10636-8 TAU_HUMAN   | Isoform Tau-F of Microtubule-associated protein tau OS=Homo sapiens OX=9606 GN=MAPT                              | actin binding; DNA binding; enzyme binding; RNA binding; microtubule binding; axonal transport; axonal transport of mitochondrion; axon development; cell-cell signaling; central nervous system neuron development; cytoplasmic microtubule organization; generation of neurons; intracellular distribution of mitochondria; microtubule cytoskeleton organization; neuron projection development; positive regulation of axon extension; positive regulation of microtubule polymerization; positive regulation of neuron death; positive regulation of protein localization to synapse; positive regulation of superoxide anion generation; regulation of long-term synaptic depression; regulation of microtubule cytoskeleton organization; regulation of microtubule polymerization; regulation of mitochondrial fission; regulation of synaptic plasticity; synapse organization | 0,000 | 397463,6 | 923887,1 | 660284,3 | 297999,9 | 800202,7 | 1,22 |
| sp Q06481-4 APLP2_HUMAN | Isoform 4 of Amyloid-like protein 2 OS=Homo sapiens OX=9606 GN=APLP2                                             | DNA binding; protein binding; cellular protein metabolic process; G protein-coupled receptor signaling pathway; post-translational protein modification                                                                                                                                                                                                                                                                                                                                                                                                                                                                                                                                                                                                                                                                                                                                 | 0,005 | 5299,8   | 12366,1  | 11731,2  | 3580,6   | 12767,6  | 1,22 |
| sp Q9HCM2 PLXA4_HUMAN   | Plexin-A4 OS=Homo sapiens OX=9606 GN=PLXNA4 PE=1 SV=4                                                            | semaphorin receptor activity; negative regulation of cell adhesion; positive regulation of axonogenesis; regulation of axon extension involved in axon guidance; regulation of cell migration; regulation of cell shape; semaphorin-plexin signaling pathway involved in axon guidance                                                                                                                                                                                                                                                                                                                                                                                                                                                                                                                                                                                                  | 0,001 | 25731,0  | 62063,4  | 64963,2  | 29293,1  | 48946,9  | 1,27 |
| sp Q13740 CD166_HUMAN   | CD166 antigen OS=Homo sapiens OX=9606 GN=ALCAM PE=1 SV=2                                                         | protein binding; axon extension involved in axon guidance; cell adhesion; heterophilic cell-cell adhesion via plasma membrane cell adhesion molecules; neuron projection extension; signal transduction                                                                                                                                                                                                                                                                                                                                                                                                                                                                                                                                                                                                                                                                                 | 0,006 | 53443,3  | 144044,7 | 237315,0 | 53646,2  | 96957,5  | 1,43 |
| sp O15394 NCAM2_HUMAN   | Neural cell adhesion molecule 2 OS=Homo sapiens OX=9606 GN=NCAM2 PE=1 SV=2                                       | identical protein binding; axonal fasciculation; neuron cell-cell adhesion                                                                                                                                                                                                                                                                                                                                                                                                                                                                                                                                                                                                                                                                                                                                                                                                              | 0,001 | 27533,9  | 85653,3  | 67221,9  | 25818,9  | 69555,9  | 1,64 |
| sp O00203-3 AP3B1_HUMAN | Isoform 2 of AP-3 complex subunit beta-1 OS=Homo sapiens OX=9606 GN=AP3B1                                        | GTP-dependent protein binding; anterograde axonal transport; anterograde synaptic vesicle transport; establishment of protein localization to mitochondrial membrane involved in mitochondrial fission; mRNA transcription by RNA polymerase II                                                                                                                                                                                                                                                                                                                                                                                                                                                                                                                                                                                                                                         | 0,002 | 54492,8  | 188646,5 | 233981,0 | 36883,8  | 173241,8 | 1,79 |
| sp Q86YM7 HOME1_HUMAN   | Homer protein homolog 1 OS=Homo sapiens OX=9606 GN=HOMER1 PE=1 SV=2                                              | G protein-coupled glutamate receptor binding; ion channel binding; positive regulation of calcium ion transport; positive regulation of signal transduction; regulation of dendritic spine maintenance; regulation of postsynaptic neurotransmitter receptor activity; regulation of store-operated calcium entry; regulation of synaptic transmission, glutamatergic; response to calcium ion; skeletal muscle contraction; skeletal muscle fiber development                                                                                                                                                                                                                                                                                                                                                                                                                          | 0,002 | 9597,6   | 19589,1  | 13986,9  | 10032,5  | 19667,5  | 1,03 |
| sp P13987 CD59_HUMAN    | CD59 glycoprotein OS=Homo sapiens OX=9606 GN=CD59 PE=1 SV=1                                                      | complement binding; cell surface receptor signaling pathway; endoplasmic reticulum to Golgi vesicle-mediated transport                                                                                                                                                                                                                                                                                                                                                                                                                                                                                                                                                                                                                                                                                                                                                                  | 0,000 | 20512,1  | 42075,7  | 43373,9  | 14890,7  | 40261,9  | 1,04 |
| sp Q43854 EDIL3_HUMAN   | EGF-like repeat and discoilin I-like domain-containing protein 3 OS=Homo sapiens OX=9606 GN=EDIL3 PE=1 SV=1      | calcium ion binding; integrin binding; cell adhesion; multicellular organism development; positive regulation of cell-substrate adhesion                                                                                                                                                                                                                                                                                                                                                                                                                                                                                                                                                                                                                                                                                                                                                | 0,000 | 288180,5 | 599921,7 | 502832,4 | 291210,4 | 572882,1 | 1,06 |
| sp Q99567 NUP88_HUMAN   | Nuclear pore complex protein Nup88 OS=Homo sapiens OX=9606 GN=NUP88 PE=1 SV=2                                    | structural constituent of nuclear pore; transporter activity; regulation of gene silencing by miRNA; mRNA export from nucleus; protein import into nucleus; ribosomal large subunit export from nucleus; ribosomal small subunit export from nucleus                                                                                                                                                                                                                                                                                                                                                                                                                                                                                                                                                                                                                                    | 0,008 | 1249,6   | 2956,2   | 3302,8   | 727,1    | 3158,5   | 1,24 |
| sp P60880 SNP25_HUMAN   | Synaptosomal-associated protein 25 OS=Homo sapiens OX=9606 GN=SNAP25 PE=1 SV=1                                   | voltage-gated potassium channel activity; calcium-dependent protein binding; exocytic insertion of neurotransmitter receptor to postsynaptic membrane; locomotory behavior; long-term synaptic potentiation; neurotransmitter receptor internalization; neurotransmitter secretion; neurotransmitter transport; neurotransmitter uptake; regulation of neuron projection development; synaptic vesicle exocytosis; synaptic vesicle fusion to presynaptic active zone membrane                                                                                                                                                                                                                                                                                                                                                                                                          | 0,000 | 71406,0  | 154173,7 | 105881,6 | 68096,2  | 139767,8 | 1,11 |
| sp Q13555-6 KCC2G_HUMAN | Isoform 6 of Calcium/calmodulin-dependent protein kinase type II subunit gamma OS=Homo sapiens OX=9606 GN=CAMK2G | nervous system development; regulation of calcium ion transport; regulation of neuron projection development; regulation of skeletal muscle adaptation                                                                                                                                                                                                                                                                                                                                                                                                                                                                                                                                                                                                                                                                                                                                  | 0,003 | 9449,8   | 20862,8  | 24381,5  | 9497,4   | 21467,5  | 1,14 |
| sp P05937 CALB1_HUMAN   | Calbindin OS=Homo sapiens OX=9606 GN=CALB1 PE=1 SV=2                                                             | calcium ion binding involved in regulation of pre- and post-synaptic cytosolic calcium ion concentration; locomotory behavior; long-term memory; regulation of cytosolic calcium ion concentration; regulation of long-term synaptic potentiation                                                                                                                                                                                                                                                                                                                                                                                                                                                                                                                                                                                                                                       | 0,007 | 28268,5  | 66681,0  | 55406,1  | 17414,9  | 71872,2  | 1,24 |
| sp Q06064-1 AP180_HUMAN | Clathrin coat assembly protein AP180 OS=Homo sapiens OX=9606 GN=SNAP91 PE=1 SV=2                                 | 1-phosphatidylinositol binding; clathrin heavy chain binding; clathrin coat assembly; clathrin-dependent endocytosis; protein transport; regulation of clathrin-dependent endocytosis; synaptic vesicle budding from presynaptic endocytic zone membrane; vesicle budding from membrane                                                                                                                                                                                                                                                                                                                                                                                                                                                                                                                                                                                                 | 0,003 | 21985,7  | 52741,6  | 55052,5  | 19703,7  | 48265,5  | 1,26 |
| sp P21579 SYT1_HUMAN    | Synaptotagmin-1 OS=Homo sapiens OX=9606 GN=SYT1 PE=1 SV=1                                                        | calcium-dependent protein binding; calcium ion binding; calcium ion sensor activity; calmodulin binding; clathrin binding; brain development; calcium-dependent activation of synaptic vesicle fusion; calcium-ion regulated exocytosis; calcium ion-regulated exocytosis of neurotransmitter; chemical synaptic transmission; positive regulation of dendrite extension; positive regulation of synaptic transmission; regulation of synaptic transmission, glutamatergic; spontaneous neurotransmitter secretion; synaptic vesicle endocytosis; vesicle-mediated transport                                                                                                                                                                                                                                                                                                            | 0,000 | 85024,8  | 222114,8 | 146817,8 | 80410,7  | 210481,1 | 1,39 |
| sp Q43761 SNG3_HUMAN    | Synaptogyrin-3 OS=Homo sapiens OX=9606 GN=SYNGR3 PE=1 SV=2                                                       | positive regulation of transporter activity; regulated exocytosis                                                                                                                                                                                                                                                                                                                                                                                                                                                                                                                                                                                                                                                                                                                                                                                                                       | 0,000 | 752,7    | 2269,3   | 2530,7   | 800,3    | 2115,4   | 1,59 |

| sp Q43581-4 SYT7_HUMAN | Isoform 4 of Synaptotagmin-7 OS=Homo sapiens OX=9606 GN=SYT7                              | calcium-dependent phospholipid binding; calcium ion binding; calmodulin binding; clathrin binding; calcium ion-regulated exocytosis of neurotransmitter; calcium ion regulated lysosome exocytosis; plasma membrane repair; synaptic vesicle recycling; vesicle-mediated transport                                                                                                                                                                                                                                                                                                                                                                                                                                                                                                                                                                               | 0,002   | 1668,9                      | 5949,6    | 4496,1   | 1472,3        | 6035,5      | 1,83                               |
|------------------------|-------------------------------------------------------------------------------------------|------------------------------------------------------------------------------------------------------------------------------------------------------------------------------------------------------------------------------------------------------------------------------------------------------------------------------------------------------------------------------------------------------------------------------------------------------------------------------------------------------------------------------------------------------------------------------------------------------------------------------------------------------------------------------------------------------------------------------------------------------------------------------------------------------------------------------------------------------------------|---------|-----------------------------|-----------|----------|---------------|-------------|------------------------------------|
| <b>DOWNREGULATED</b>   |                                                                                           |                                                                                                                                                                                                                                                                                                                                                                                                                                                                                                                                                                                                                                                                                                                                                                                                                                                                  |         |                             |           |          |               |             |                                    |
| PROTEIN                | GROUP AND RELATED GENE (GN)                                                               | GO: BIOLOGICAL FUNCTION                                                                                                                                                                                                                                                                                                                                                                                                                                                                                                                                                                                                                                                                                                                                                                                                                                          | P-value | Protein Mean Peak Intensity |           |          |               |             | Log <sub>2</sub> FC<br>FRDA/ISO CT |
|                        |                                                                                           |                                                                                                                                                                                                                                                                                                                                                                                                                                                                                                                                                                                                                                                                                                                                                                                                                                                                  |         | Mean ISO CT                 | Mean FRDA | Mean CT  | Median ISO CT | Median FRDA |                                    |
| sp Q9UPT8 ZC3H4_HUMAN  | Zinc finger CCCH domain-containing protein 4 OS=Homo sapiens OX=9606 GN=ZC3H4 PE=1 SV=3   | DNA-binding transcription factor activity, RNA polymerase II-specific; metal ion binding; RNA binding                                                                                                                                                                                                                                                                                                                                                                                                                                                                                                                                                                                                                                                                                                                                                            | 0,000   | 7219,2                      | 1992,1    | 1752,3   | 9209,7        | 1779,8      | -1,86                              |
| sp Q96EK4 THA11_HUMAN  | THAP domain-containing protein 11 OS=Homo sapiens OX=9606 GN=THA11 PE=1 SV=2              | regulation of transcription by RNA polymerase II; DNA binding; DNA-binding transcription factor activity, RNA polymerase II-specific; DNA-binding transcription repressor activity, RNA polymerase II-specific; RNA polymerase II cis-regulatory region sequence-specific DNA binding; zinc ion binding                                                                                                                                                                                                                                                                                                                                                                                                                                                                                                                                                          | 0,001   | 6104,8                      | 2096,7    | 3061,8   | 5267,6        | 1601,4      | -1,54                              |
| sp Q12849 GRSF1_HUMAN  | G-rich sequence factor 1 OS=Homo sapiens OX=9606 GN=GRSF1 PE=1 SV=3                       | mRNA binding; anterior/posterior pattern specification; morphogenesis of embryonic epithelium; mRNA polyadenylation; positive regulation of mitochondrial RNA catabolic process; regulation of RNA splicing; tRNA processing                                                                                                                                                                                                                                                                                                                                                                                                                                                                                                                                                                                                                                     | 0,002   | 3080,5                      | 1266,3    | 1091,3   | 2875,0        | 948,6       | -1,28                              |
| sp Q95347 SMC2_HUMAN   | Structural maintenance of chromosomes protein 2 OS=Homo sapiens OX=9606 GN=SMC2 PE=1 SV=2 | chromatin binding; single-stranded DNA binding; ATP binding; ATPase activity; cell division; kinetochore organization; meiotic chromosome condensation; meiotic chromosome segregation; mitotic chromosome condensation                                                                                                                                                                                                                                                                                                                                                                                                                                                                                                                                                                                                                                          | 0,005   | 33131,1                     | 13658,1   | 16917,0  | 20526,9       | 12703,2     | -1,28                              |
| sp Q9UPN6 SCAF8_HUMAN  | SR-related and CTD-associated factor 8 OS=Homo sapiens OX=9606 GN=SCAF8 PE=1 SV=1         | mRNA polyadenylation; negative regulation of termination of RNA polymerase II transcription, poly(A)-coupled; positive regulation of DNA-templated transcription, elongation; termination of RNA polymerase II transcription                                                                                                                                                                                                                                                                                                                                                                                                                                                                                                                                                                                                                                     | 0,005   | 6800,5                      | 2912,6    | 4955,3   | 5924,8        | 2149,4      | -1,22                              |
| sp Q12996 CSTF3_HUMAN  | Cleavage stimulation factor subunit 3 OS=Homo sapiens OX=9606 GN=CSTF3 PE=1 SV=1          | mRNA binding; mRNA splicing; mRNA cleavage                                                                                                                                                                                                                                                                                                                                                                                                                                                                                                                                                                                                                                                                                                                                                                                                                       | 0,000   | 33377,1                     | 14846,0   | 14948,7  | 38310,5       | 13344,9     | -1,17                              |
| sp Q9BZ95-4 NSD3_HUMAN | Isoform 4 of Histone-lysine N-methyltransferase NSD3 OS=Homo sapiens OX=9606 GN=NSD3      | histone methylation; regulation of transcription                                                                                                                                                                                                                                                                                                                                                                                                                                                                                                                                                                                                                                                                                                                                                                                                                 | 0,007   | 5253,3                      | 2477,1    | 1777,6   | 6421,0        | 2959,2      | -1,08                              |
| sp Q04206 TF65_HUMAN   | Transcription factor p65 OS=Homo sapiens OX=9606 GN=RELA PE=1 SV=2                        | regulation of transcription; regulation of apoptotic process; regulation of protein catabolic process; response to muscle stretch                                                                                                                                                                                                                                                                                                                                                                                                                                                                                                                                                                                                                                                                                                                                | 0,005   | 5156,7                      | 2460,3    | 2291,6   | 5285,2        | 2055,6      | -1,07                              |
| sp P84243 H33_HUMAN    | Histone H3.3 OS=Homo sapiens OX=9606 GN=H3F3A PE=1 SV=2                                   | regulation of gene expression; nucleosome assembly; regulation of gene silencing by miRNA; muscle cell differentiation; negative regulation of chromosome condensation                                                                                                                                                                                                                                                                                                                                                                                                                                                                                                                                                                                                                                                                                           | 0,009   | 594098,9                    | 287200,1  | 214567,1 | 697003,4      | 312905,9    | -1,05                              |
| sp Q9C005 DPY30_HUMAN  | Protein dpy-30 homolog OS=Homo sapiens OX=9606 GN=DPY30 PE=1 SV=1                         | chromatin silencing at telomere; endosomal transport; histone H3-K4 methylation                                                                                                                                                                                                                                                                                                                                                                                                                                                                                                                                                                                                                                                                                                                                                                                  | 0,000   | 34138,8                     | 17047,7   | 20985,8  | 36409,2       | 18642,1     | -1,00                              |
| sp P32521 RFC1_HUMAN   | Replication factor C subunit 1 OS=Homo sapiens OX=9606 GN=RFC1 PE=1 SV=4                  | base-excision repair, gap-filling; DNA clamp unloading; DNA damage response, detection of DNA damage; DNA-dependent DNA replication                                                                                                                                                                                                                                                                                                                                                                                                                                                                                                                                                                                                                                                                                                                              | 0,009   | 5027,6                      | 2286,0    | 1961,6   | 5306,0        | 1794,9      | -1,14                              |
| sp Q9BPX3 CND3_HUMAN   | Condensin complex subunit 3 OS=Homo sapiens OX=9606 GN=NCAPG PE=1 SV=1                    | cell division; mitotic chromosome condensation                                                                                                                                                                                                                                                                                                                                                                                                                                                                                                                                                                                                                                                                                                                                                                                                                   | 0,008   | 25872,6                     | 12065,7   | 5220,9   | 26157,9       | 10559,9     | -1,10                              |
| sp Q9H773 DCTP1_HUMAN  | dCTP pyrophosphatase 1 OS=Homo sapiens OX=9606 GN=DCTPP1 PE=1 SV=1                        | dCTP catabolic process; DNA protection; nucleoside triphosphate catabolic process                                                                                                                                                                                                                                                                                                                                                                                                                                                                                                                                                                                                                                                                                                                                                                                | 0,000   | 26644,2                     | 12760,9   | 13429,2  | 23715,3       | 13443,4     | -1,06                              |
| sp P24941 CDK2_HUMAN   | Cyclin-dependent kinase 2 OS=Homo sapiens OX=9606 GN=CDK2 PE=1 SV=2                       | cell division; DNA repair; DNA replication; regulation of gene expression; histone phosphorylation; protein phosphorylation; signal transduction                                                                                                                                                                                                                                                                                                                                                                                                                                                                                                                                                                                                                                                                                                                 | 0,005   | 7986,1                      | 3903,5    | 5040,0   | 7434,9        | 2737,7      | -1,03                              |
| sp Q9H9T3 ELP3_HUMAN   | Elongator complex protein 3 OS=Homo sapiens OX=9606 GN=ELP3 PE=1 SV=2                     | 4 iron, 4 sulfur cluster binding; acetyltransferase activity; metal ion binding; N-acetyltransferase activity; phosphorylase kinase regulator activity; tRNA binding; central nervous system development; neuron migration; positive regulation of cell migration; regulation of transcription by RNA polymerase II; tRNA uridine modification                                                                                                                                                                                                                                                                                                                                                                                                                                                                                                                   | 0,001   | 12866,3                     | 5387,1    | 10526,5  | 13666,2       | 5514,9      | -1,26                              |
| sp Q96PU8 QKI_HUMAN    | Protein quaking OS=Homo sapiens OX=9606 GN=QKI PE=1 SV=1                                  | long-chain fatty acid biosynthetic process; mRNA processing; mRNA transport; muscle cell differentiation; myelination; positive regulation of gene expression; regulation of mRNA splicing, via spliceosome; regulation of translation; RNA splicing                                                                                                                                                                                                                                                                                                                                                                                                                                                                                                                                                                                                             | 0,008   | 13689,2                     | 5991,9    | 6472,7   | 16831,0       | 4707,9      | -1,19                              |
| sp P56545 CTBP2_HUMAN  | C-terminal-binding protein 2 OS=Homo sapiens OX=9606 GN=CTBP2 PE=1 SV=1                   | chromatin binding; identical protein binding; NAD binding; oxidoreductase activity; negative regulation of transcription by RNA polymerase II; positive regulation of chromatin binding; synaptic vesicle docking                                                                                                                                                                                                                                                                                                                                                                                                                                                                                                                                                                                                                                                | 0,006   | 25731,1                     | 11960,5   | 12653,4  | 28305,8       | 10288,4     | -1,11                              |
| sp P78417 GSTO1_HUMAN  | Glutathione S-transferase omega-1 OS=Homo sapiens OX=9606 GN=GSTO1 PE=1 SV=2              | glutathione dehydrogenase (ascorbate) activity; glutathione transferase activity; methylarsenate reductase activity; oxidoreductase activity cellular response to arsenic-containing substance; glutathione derivative biosynthetic process; glutathione metabolic process; interleukin-12-mediated signaling pathway; L-ascorbic acid metabolic process; methylation; negative regulation of ryanodine-sensitive calcium-release channel activity; positive regulation of ryanodine-sensitive calcium-release channel activity; positive regulation of skeletal muscle contraction by regulation of release of sequestered calcium ion; regulation of cardiac muscle contraction by regulation of the release of sequestered calcium ion; regulation of release of sequestered calcium ion into cytosol by sarcoplasmic reticulum; xenobiotic catabolic process | 0,000   | 41800,8                     | 12811,0   | 54244,4  | 52632,9       | 11358,4     | -1,71                              |
| sp Q5EB52 MEST_HUMAN   | Mesoderm-specific transcript homolog protein OS=Homo sapiens OX=9606 GN=MEST PE=2 SV=2    | hydrolase activity; regulation of lipid storage                                                                                                                                                                                                                                                                                                                                                                                                                                                                                                                                                                                                                                                                                                                                                                                                                  | 0,000   | 17592,1                     | 5417,0    | 9789,7   | 14071,4       | 5591,8      | -1,70                              |

|                         |                                                                                                                          |                                                                                                                                                                                                                                                                                                                                                                                                                                                                                                                                                                                                                                                                                                                                                                                                                                                                                                                                                                                                                                                                                                                                                                                                                                      |       |          |          |          |          |          |       |
|-------------------------|--------------------------------------------------------------------------------------------------------------------------|--------------------------------------------------------------------------------------------------------------------------------------------------------------------------------------------------------------------------------------------------------------------------------------------------------------------------------------------------------------------------------------------------------------------------------------------------------------------------------------------------------------------------------------------------------------------------------------------------------------------------------------------------------------------------------------------------------------------------------------------------------------------------------------------------------------------------------------------------------------------------------------------------------------------------------------------------------------------------------------------------------------------------------------------------------------------------------------------------------------------------------------------------------------------------------------------------------------------------------------|-------|----------|----------|----------|----------|----------|-------|
| sp Q7Z4H3 HDDC2_HUMAN   | HD domain-containing protein 2 OS=Homo sapiens OX=9606 GN=HDDC2 PE=1 SV=1                                                | 5'-deoxynucleotidase activity; metal ion binding                                                                                                                                                                                                                                                                                                                                                                                                                                                                                                                                                                                                                                                                                                                                                                                                                                                                                                                                                                                                                                                                                                                                                                                     | 0,006 | 16916,4  | 5552,1   | 2785,5   | 13045,3  | 3963,6   | -1,61 |
| sp O75976 CBPD_HUMAN    | Carboxypeptidase D OS=Homo sapiens OX=9606 GN=CPD PE=1 SV=2                                                              | metallocarboxypeptidase activity; serine-type carboxypeptidase activity; zinc ion binding; peptide metabolic process; protein processing                                                                                                                                                                                                                                                                                                                                                                                                                                                                                                                                                                                                                                                                                                                                                                                                                                                                                                                                                                                                                                                                                             | 0,000 | 59589,1  | 20881,7  | 37782,7  | 71819,7  | 17344,6  | -1,51 |
| sp Q01628 IFM3_HUMAN    | Interferon-induced transmembrane protein 3 OS=Homo sapiens OX=9606 GN=IFITM3 PE=1 SV=2                                   | defense response to virus; immune response; negative regulation of viral entry into host cell; negative regulation of viral genome replication; negative regulation of viral transcription; response to interferon-alpha; response to interferon-beta; response to interferon-gamma; response to virus; type I interferon signaling pathway                                                                                                                                                                                                                                                                                                                                                                                                                                                                                                                                                                                                                                                                                                                                                                                                                                                                                          | 0,007 | 6132,4   | 2249,2   | 6776,0   | 4602,2   | 1148,2   | -1,45 |
| sp P00338 LDHA_HUMAN    | L-lactate dehydrogenase A chain OS=Homo sapiens OX=9606 GN=LDHA PE=1 SV=2                                                | L-lactate dehydrogenase activity; carbohydrate metabolic process; carboxylic acid metabolic process                                                                                                                                                                                                                                                                                                                                                                                                                                                                                                                                                                                                                                                                                                                                                                                                                                                                                                                                                                                                                                                                                                                                  | 0,001 | 568446,7 | 221896,9 | 728496,5 | 356305,2 | 225622,6 | -1,36 |
| sp Q9NPH2 INO1_HUMAN    | Inositol-3-phosphate synthase 1 OS=Homo sapiens OX=9606 GN=ISYNA1 PE=1 SV=1                                              | inositol biosynthetic process; phospholipid biosynthetic process                                                                                                                                                                                                                                                                                                                                                                                                                                                                                                                                                                                                                                                                                                                                                                                                                                                                                                                                                                                                                                                                                                                                                                     | 0,001 | 128507,3 | 50811,9  | 65935,4  | 157117,1 | 48164,8  | -1,34 |
| sp Q9NPA0 EMC7_HUMAN    | ER membrane protein complex subunit 7 OS=Homo sapiens OX=9606 GN=EMC7 PE=1 SV=1                                          | carbohydrate binding; protein insertion into ER membrane by stop-transfer membrane-anchor sequence; tail-anchored membrane protein insertion into ER membrane; part of the endoplasmic reticulum membrane protein complex (EMC) that enables the energy-independent insertion into endoplasmic reticulum membranes of newly synthesized membrane proteins                                                                                                                                                                                                                                                                                                                                                                                                                                                                                                                                                                                                                                                                                                                                                                                                                                                                            | 0,008 | 59332,4  | 23769,4  | 98207,5  | 43973,7  | 27504,3  | -1,32 |
| sp Q8TF05-2 PP4R1_HUMAN | Isoform 2 of Serine/threonine-protein phosphatase 4 regulatory subunit 1 OS=Homo sapiens OX=9606 GN=PPP4R1               | protein dephosphorylation; protein phosphorylation; signal transduction                                                                                                                                                                                                                                                                                                                                                                                                                                                                                                                                                                                                                                                                                                                                                                                                                                                                                                                                                                                                                                                                                                                                                              | 0,002 | 5013,9   | 2202,2   | 772,1    | 5676,0   | 1692,9   | -1,19 |
| sp P10415 BCL2_HUMAN    | Apoptosis regulator Bcl-2 OS=Homo sapiens OX=9606 GN=BCL2 PE=1 SV=2                                                      | BH3 domain binding; channel activity; channel inhibitor activity; identical protein binding; protease binding; actin filament organization; apoptotic process; axonogenesis; axon regeneration; cell aging; cell-cell adhesion; cellular response to DNA damage stimulus; cellular response to glucose starvation; cellular response to hypoxia; extrinsic apoptotic signaling pathway in absence of ligand; extrinsic apoptotic signaling pathway via death domain receptors; focal adhesion assembly; negative regulation of apoptotic process ; negative regulation of apoptotic signaling pathway; negative regulation of autophagy; negative regulation of calcium ion transport into cytosol; negative regulation of cell growth; negative regulation of cell migration; negative regulation of mitochondrial depolarization; negative regulation of neuron apoptotic process; positive regulation of neuron maturation; reactive oxygen species metabolic process; regulation of calcium ion transport; regulation of cell-matrix adhesion; regulation of gene expression; regulation of glycoprotein biosynthetic process; regulation of mitochondrial membrane permeability; regulation of mitochondrial membrane potential | 0,003 | 4949,0   | 2180,9   | 2347,1   | 6176,9   | 1731,0   | -1,18 |
| sp Q15118 PDK1_HUMAN    | [Pyruvate dehydrogenase (acetyl-transferring)] kinase isozyme 1, mitochondrial OS=Homo sapiens OX=9606 GN=PDK1 PE=1 SV=1 | 3-phosphoinositide-dependent protein kinase activity; apoptotic process; cell differentiation; cell surface receptor signaling pathway; positive regulation of cell growth; synaptic growth at neuromuscular junction                                                                                                                                                                                                                                                                                                                                                                                                                                                                                                                                                                                                                                                                                                                                                                                                                                                                                                                                                                                                                | 0,009 | 17280,9  | 8028,8   | 9184,7   | 17490,6  | 7620,5   | -1,11 |
| sp Q06323 PSME1_HUMAN   | Proteasome activator complex subunit 1 OS=Homo sapiens OX=9606 GN=PSME1 PE=1 SV=1                                        | anaphase-promoting complex-dependent catabolic process; antigen processing; positive regulation of endopeptidase activity; positive regulation of canonical Wnt signaling pathway; regulation of mitotic cell cycle phase transition; regulation of mRNA stability; regulation of proteasomal protein catabolic process; transmembrane transport                                                                                                                                                                                                                                                                                                                                                                                                                                                                                                                                                                                                                                                                                                                                                                                                                                                                                     | 0,000 | 52119,8  | 24295,1  | 38792,3  | 51167,0  | 24383,3  | -1,10 |
| sp O00483 NDUFA4_HUMAN  | Cytochrome c oxidase subunit NDUFA4 OS=Homo sapiens OX=9606 GN=NDUFA4 PE=1 SV=1                                          | mitochondrial electron transport, cytochrome c to oxygen; mitochondrial electron transport, NADH to ubiquinone; positive regulation of cytochrome-c oxidase activity; proton transmembrane transport                                                                                                                                                                                                                                                                                                                                                                                                                                                                                                                                                                                                                                                                                                                                                                                                                                                                                                                                                                                                                                 | 0,000 | 71796,7  | 33872,1  | 59137,1  | 68944,8  | 31637,4  | -1,08 |
| sp Q8NFI3 ENASE_HUMAN   | Cytosolic endo-beta-N-acetylglucosaminidase OS=Homo sapiens OX=9606 GN=ENGASE PE=1 SV=1                                  | hydrolase activity, hydrolyzing O-glycosyl compounds; protein deglycosylation                                                                                                                                                                                                                                                                                                                                                                                                                                                                                                                                                                                                                                                                                                                                                                                                                                                                                                                                                                                                                                                                                                                                                        | 0,007 | 3286,7   | 1640,6   | 3219,5   | 3014,1   | 1280,7   | -1,00 |
| sp Q15063-5 POSTN_HUMAN | Isoform 5 of Periostin OS=Homo sapiens OX=9606 GN=POSTN                                                                  | cell adhesion molecule binding; heparin binding; metal ion binding; bone regeneration; cell adhesion; cellular response to fibroblast growth factor stimulus; cellular response to transforming growth factor beta; cellular response to tumor necrosis factor; cellular response to vitamin K; extracellular matrix organization; negative regulation of cell-matrix adhesion; negative regulation of substrate adhesion-dependent cell spreading; neuron projection extension; positive regulation of chemokine (C-X-C motif) ligand 2 production; positive regulation of smooth muscle cell migration; regulation of Notch signaling pathway; regulation of systemic arterial blood pressure; response to hypoxia; response to mechanical stimulus; response to muscle activity; tissue development; wound healing                                                                                                                                                                                                                                                                                                                                                                                                                | 0,001 | 83386,8  | 25267,4  | 52190,0  | 99875,1  | 18971,6  | -1,72 |
| sp P13797 PLST_HUMAN    | Plastin-3 OS=Homo sapiens OX=9606 GN=PLS3 PE=1 SV=4                                                                      | actin filament binding; calcium ion binding actin filament bundle assembly; actin filament network formation; bone development                                                                                                                                                                                                                                                                                                                                                                                                                                                                                                                                                                                                                                                                                                                                                                                                                                                                                                                                                                                                                                                                                                       | 0,000 | 150688,1 | 51227,6  | 128506,5 | 181379,2 | 48804,9  | -1,56 |
| sp Q9Y490 TLN1_HUMAN    | Talin-1 OS=Homo sapiens OX=9606 GN=TLN1 PE=1 SV=3                                                                        | actin filament binding; cadherin binding; integrin binding; LIM domain binding; phosphatidylinositol binding; phosphatidylserine binding; structural constituent of cytoskeleton; vinculin binding; cell-cell adhesion; cell-cell junction assembly; cell-substrate junction assembly; cortical actin cytoskeleton organization; integrin activation; integrin-mediated signaling pathway; IRE1-mediated unfolded protein response; muscle contraction; platelet aggregation; platelet degranulation; viral process                                                                                                                                                                                                                                                                                                                                                                                                                                                                                                                                                                                                                                                                                                                  | 0,001 | 37101,1  | 12961,9  | 18862,4  | 49559,7  | 13137,3  | -1,52 |
| sp P20810-6 ICAL_HUMAN  | Isoform 6 of Calpastatin OS=Homo sapiens OX=9606 GN=CAST                                                                 | cadherin binding; calcium-dependent cysteine-type endopeptidase inhibitor activity; endopeptidase inhibitor activity; RNA binding inhibition of cysteine-type endopeptidase activity; negative regulation of type B; pancreatic cell apoptotic process; presynaptic active zone organization                                                                                                                                                                                                                                                                                                                                                                                                                                                                                                                                                                                                                                                                                                                                                                                                                                                                                                                                         | 0,002 | 4798,6   | 1722,6   | 6050,0   | 4572,8   | 860,0    | -1,48 |
| sp Q05682-5 CALD1_HUMAN | Isoform 5 of Caldesmon OS=Homo sapiens OX=9606 GN=CALD1                                                                  | actin binding; cadherin binding; calmodulin binding; myosin binding; tropomyosin binding; actin filament bundle assembly; angiogenesis; muscle contraction                                                                                                                                                                                                                                                                                                                                                                                                                                                                                                                                                                                                                                                                                                                                                                                                                                                                                                                                                                                                                                                                           | 0,001 | 29765,1  | 13931,4  | 31728,9  | 28676,5  | 12843,1  | -1,10 |
| sp Q9BVC6 TM109_HUMAN   | Transmembrane protein 109 OS=Homo sapiens OX=9606 GN=TMEM109 PE=1 SV=1                                                   | voltage-gated ion channel activity; intrinsic apoptotic signaling pathway in response to DNA damage by p53 class mediator; negative regulation of cell death; regulation of ion transmembrane transport                                                                                                                                                                                                                                                                                                                                                                                                                                                                                                                                                                                                                                                                                                                                                                                                                                                                                                                                                                                                                              | 0,001 | 57317,4  | 26796,1  | 21339,2  | 59240,8  | 25369,8  | -1,10 |

**DIFFERENTIALLY EXPRESSED PROTEINS – ISO CT vs CT**

**UPREGULATED**

| PROTEIN                 | GROUP AND RELATED GENE (GN)                                                                                                  | GO: BIOLOGICAL FUNCTION                                                                                                                                                                                                                                                                                                                                                                                                                                                                                                                              | P-value | Protein Mean Peak Intensity |             |           |           |               | Log <sub>2</sub> FC ISO CT/CT |
|-------------------------|------------------------------------------------------------------------------------------------------------------------------|------------------------------------------------------------------------------------------------------------------------------------------------------------------------------------------------------------------------------------------------------------------------------------------------------------------------------------------------------------------------------------------------------------------------------------------------------------------------------------------------------------------------------------------------------|---------|-----------------------------|-------------|-----------|-----------|---------------|-------------------------------|
|                         |                                                                                                                              |                                                                                                                                                                                                                                                                                                                                                                                                                                                                                                                                                      |         | Mean CT                     | Mean ISO CT | Mean FRDA | Median CT | Median ISO CT |                               |
| sp Q9Y3B4 SF3B6_HUMAN   | Splicing factor 3B subunit 6 OS=Homo sapiens OX=9606 GN=SF3B6 PE=1 SV=1                                                      | mRNA binding; RNA binding; mRNA splicing, via spliceosome                                                                                                                                                                                                                                                                                                                                                                                                                                                                                            | 0,009   | 16933,8                     | 34646,0     | 31681,3   | 16717,6   | 39571,4       | 1,03                          |
| sp Q14119 VEZF1_HUMAN   | Vascular endothelial zinc finger 1 OS=Homo sapiens OX=9606 GN=VEZF1 PE=1 SV=2                                                | DNA-binding transcription activator activity, RNA polymerase II-specific; cellular defense response; endothelial cell development                                                                                                                                                                                                                                                                                                                                                                                                                    | 0,007   | 1866,0                      | 3818,9      | 3181,7    | 1519,7    | 3928,4        | 1,03                          |
| sp Q12996 CSTF3_HUMAN   | Cleavage stimulation factor subunit 3 OS=Homo sapiens OX=9606 GN=CSTF3 PE=1 SV=1                                             | mRNA binding; mRNA splicing; mRNA cleavage                                                                                                                                                                                                                                                                                                                                                                                                                                                                                                           | 0,004   | 14948,7                     | 33377,1     | 14846,0   | 15526,2   | 38310,5       | 1,16                          |
| sp P46782 RS5_HUMAN     | 40S ribosomal protein S5 OS=Homo sapiens OX=9606 GN=RPS5 PE=1 SV=4                                                           | mRNA binding; structural constituent of ribosome; cytoplasmic translation; nuclear-transcribed mRNA catabolic process, nonsense-mediated decay                                                                                                                                                                                                                                                                                                                                                                                                       | 0,009   | 115082,3                    | 260217,7    | 195136,9  | 125754,9  | 285223,7      | 1,18                          |
| sp Q9Y333 LSM2_HUMAN    | U6 snRNA-associated Sm-like protein LSm2 OS=Homo sapiens OX=9606 GN=LSM2 PE=1 SV=1                                           | RNA binding; small GTPase binding; U6 snRNA binding; exonucleolytic catabolism of deadenylated mRNA; mRNA catabolic process; mRNA splicing, via spliceosome; spliceosomal tri-snRNP complex assembly                                                                                                                                                                                                                                                                                                                                                 | 0,000   | 16206,8                     | 37123,1     | 21222,2   | 14042,3   | 34627,0       | 1,20                          |
| sp Q13895 BYST_HUMAN    | Bystin OS=Homo sapiens OX=9606 GN=BYSL PE=1 SV=3                                                                             | RNA binding; snoRNA binding; maturation of SSU-rRNA from tricistronic rRNA transcript (SSU-rRNA, 5.8S rRNA, LSU-rRNA); regulation of protein localization to nucleolus; ribosome biogenesis; rRNA processing                                                                                                                                                                                                                                                                                                                                         | 0,010   | 3741,0                      | 10966,5     | 6589,5    | 3379,0    | 11715,0       | 1,55                          |
| sp P55209 NP1L1_HUMAN   | Nucleosome assembly protein 1-like 1 OS=Homo sapiens OX=9606 GN=NAP1L1 PE=1 SV=1                                             | chromatin binding; histone binding; RNA binding; DNA replication; nucleosome assembly; positive regulation of cell population proliferation; positive regulation of neural precursor cell proliferation; positive regulation of neurogenesis                                                                                                                                                                                                                                                                                                         | 0,002   | 87163,6                     | 288853,7    | 168816,9  | 91911,8   | 285655,0      | 1,73                          |
| sp Q9H0U6 RM18_HUMAN    | 39S ribosomal protein L18, mitochondrial OS=Homo sapiens OX=9606 GN=MRPL18 PE=1 SV=1                                         | structural constituent of ribosome; mitochondrial translational elongation; mitochondrial translational termination; rRNA import into mitochondrion                                                                                                                                                                                                                                                                                                                                                                                                  | 0,003   | 5059,9                      | 17288,0     | 12073,3   | 4338,3    | 16813,5       | 1,77                          |
| sp Q9UPT8 ZC3H4_HUMAN   | Zinc finger CCCH domain-containing protein 4 OS=Homo sapiens OX=9606 GN=ZC3H4 PE=1 SV=3                                      | DNA-binding transcription factor activity, RNA polymerase II-specific; metal ion binding; RNA binding                                                                                                                                                                                                                                                                                                                                                                                                                                                | 0,003   | 1752,3                      | 7219,2      | 1992,1    | 1184,0    | 9209,7        | 2,04                          |
| sp Q9BPX3 CND3_HUMAN    | Condensin complex subunit 3 OS=Homo sapiens OX=9606 GN=NCAPG PE=1 SV=1                                                       | cell division; mitotic chromosome condensation                                                                                                                                                                                                                                                                                                                                                                                                                                                                                                       | 0,010   | 5220,9                      | 25872,6     | 12065,7   | 6048,9    | 26157,9       | 2,31                          |
| sp Q6PD62 CTR9_HUMAN    | RNA polymerase-associated protein CTR9 homolog OS=Homo sapiens OX=9606 GN=CTR9 PE=1 SV=1                                     | RNA polymerase II complex binding; SH2 domain binding; histone H2B ubiquitination; histone H3-K4 trimethylation; histone monoubiquitination; negative regulation of mRNA polyadenylation; negative regulation of transcription by RNA polymerase II; positive regulation of histone H2B ubiquitination; positive regulation of histone H3-K4 methylation; positive regulation of histone H3-K79 methylation; regulation of transcription, DNA-templated; stem cell population maintenance; transcription by RNA polymerase II; Wnt signaling pathway | 0,006   | 2959,0                      | 14734,8     | 7027,5    | 2451,6    | 16092,6       | 2,32                          |
| sp Q16540 RM23_HUMAN    | 39S ribosomal protein L23, mitochondrial OS=Homo sapiens OX=9606 GN=MRPL23 PE=1 SV=1                                         | RNA binding; structural constituent of ribosome; mitochondrial translation; mitochondrial translational elongation; mitochondrial translational termination                                                                                                                                                                                                                                                                                                                                                                                          | 0,008   | 1338,5                      | 9098,9      | 6535,8    | 1035,0    | 6856,3        | 2,77                          |
| sp Q9NQ48-3 LZTL1_HUMAN | Isoform 3 of Leucine zipper transcription factor-like protein 1 OS=Homo sapiens OX=9606 GN=LZTL1                             | identical protein binding; protein-containing complex binding; cilium assembly; negative regulation of protein localization to ciliary membrane; may play a role in neurite outgrowth                                                                                                                                                                                                                                                                                                                                                                | 0,003   | 1836,8                      | 12707,1     | 7955,7    | 1863,4    | 15702,5       | 2,79                          |
| sp P55039 DRG2_HUMAN    | Developmentally-regulated GTP-binding protein 2 OS=Homo sapiens OX=9606 GN=DRG2 PE=1 SV=1                                    | GTPase activity; GTP binding; metal ion binding; RNA binding; signal transduction; cytoplasmic translation                                                                                                                                                                                                                                                                                                                                                                                                                                           | 0,002   | 20701,8                     | 41598,2     | 25918,6   | 21229,7   | 38004,0       | 1,01                          |
| sp P42167 LAP2B_HUMAN   | Lamina-associated polypeptide 2, isoforms beta/gamma OS=Homo sapiens OX=9606 GN=TMPO PE=1 SV=2                               | cadherin binding; DNA binding; lamin binding; regulation of transcription, DNA-templated                                                                                                                                                                                                                                                                                                                                                                                                                                                             | 0,005   | 63865,6                     | 132618,8    | 82154,4   | 69386,3   | 151657,4      | 1,05                          |
| sp Q86TG7-2 PEG10_HUMAN | Isoform 2 of Retrotransposon-derived protein PEG10 OS=Homo sapiens OX=9606 GN=PEG10                                          | DNA binding; RNA binding; zinc binding; apoptotic process; cell differentiation; negative regulation of transforming growth factor beta receptor signaling pathway                                                                                                                                                                                                                                                                                                                                                                                   | 0,009   | 6148,6                      | 15058,4     | 8272,1    | 4703,3    | 13574,0       | 1,29                          |
| sp P35244 RFA3_HUMAN    | Replication protein A 14 kDa subunit OS=Homo sapiens OX=9606 GN=RPA3 PE=1 SV=1                                               | damaged DNA binding; single-stranded DNA binding; base-excision repair; base-excision repair, gap-filling; DNA damage response; detection of DNA damage; DNA replication; DNA replication initiation; double-strand break repair via homologous recombination; regulation of signal transduction by p53 class mediator; telomere maintenance                                                                                                                                                                                                         | 0,007   | 19194,8                     | 42012,3     | 25628,1   | 19383,0   | 44564,9       | 1,13                          |
| sp Q9Y5B9 SP16H_HUMAN   | FACT complex subunit SPT16 OS=Homo sapiens OX=9606 GN=SUPT16H PE=1 SV=1                                                      | nucleosome binding; RNA binding; DNA repair; DNA replication; DNA replication-independent nucleosome organization; nucleosome disassembly; positive regulation of DNA-templated transcription, elongation; positive regulation of transcription elongation from RNA polymerase II promoter; regulation of signal transduction by p53 class mediator                                                                                                                                                                                                  | 0,008   | 58300,9                     | 142036,4    | 84854,9   | 59834,9   | 119219,3      | 1,28                          |
| sp A6NHR9 SMHD1_HUMAN   | Structural maintenance of chromosomes flexible hinge domain-containing protein 1 OS=Homo sapiens OX=9606 GN=SMCHD1 PE=1 SV=2 | ATPase activity; ATP binding; DNA binding; dosage compensation by inactivation of X chromosome; double-strand break repair; heterochromatin organization involved in chromatin silencing; inactivation of X chromosome by DNA methylation; inactivation of X chromosome by heterochromatin assembly; negative regulation of double-strand break repair via homologous recombination; positive regulation of DNA repair; positive regulation of double-strand break repair via nonhomologous end joining                                              | 0,005   | 10049,4                     | 23057,4     | 13469,3   | 10017,8   | 24380,7       | 1,20                          |
| sp P30084 ECHM_HUMAN    | Enoyl-CoA hydratase, mitochondrial OS=Homo sapiens OX=9606 GN=ECHS1 PE=1 SV=4                                                | branched-chain amino acid catabolic process; fatty acid beta-oxidation                                                                                                                                                                                                                                                                                                                                                                                                                                                                               | 0,000   | 142273,3                    | 290415,1    | 279863,0  | 142049,3  | 294716,6      | 1,03                          |
| sp Q709C8-4 VP13C_HUMAN | Isoform 4 of Vacuolar protein sorting-associated protein 13C OS=Homo sapiens OX=9606 GN=VPS13C                               | Golgi to endosome transport; mitochondrion organization; negative regulation of parkin-mediated stimulation of mitophagy in response to mitochondrial depolarization; necessary for proper mitochondrial function and maintenance of mitochondrial transmembrane potential                                                                                                                                                                                                                                                                           | 0,008   | 3194,1                      | 6658,3      | 5478,2    | 2497,3    | 6467,4        | 1,06                          |

|                         |                                                                                                                    |                                                                                                                                                                                                                                                                                                                                                                                                                                                                                                                                                                                                                                                                                                                                                                                                                                                                                                                                                                                                                                                                                                                                                                                                                                                                                                                                                                                                                                                              |       |         |          |         |         |          |      |
|-------------------------|--------------------------------------------------------------------------------------------------------------------|--------------------------------------------------------------------------------------------------------------------------------------------------------------------------------------------------------------------------------------------------------------------------------------------------------------------------------------------------------------------------------------------------------------------------------------------------------------------------------------------------------------------------------------------------------------------------------------------------------------------------------------------------------------------------------------------------------------------------------------------------------------------------------------------------------------------------------------------------------------------------------------------------------------------------------------------------------------------------------------------------------------------------------------------------------------------------------------------------------------------------------------------------------------------------------------------------------------------------------------------------------------------------------------------------------------------------------------------------------------------------------------------------------------------------------------------------------------|-------|---------|----------|---------|---------|----------|------|
| sp Q95486 SC24A_HUMAN   | Protein transport protein Sec24A OS=Homo sapiens OX=9606 GN=SEC24A PE=1 SV=2                                       | COPII vesicle coating; endoplasmic reticulum to Golgi vesicle-mediated transport; intracellular protein transport                                                                                                                                                                                                                                                                                                                                                                                                                                                                                                                                                                                                                                                                                                                                                                                                                                                                                                                                                                                                                                                                                                                                                                                                                                                                                                                                            | 0,008 | 12196,8 | 25741,8  | 21727,3 | 12893,1 | 27058,1  | 1,08 |
| sp P61289-2 PSME3_HUMAN | Isoform 2 of Proteasome activator complex subunit 3 OS=Homo sapiens OX=9606 GN=PSME3                               | endopeptidase activator activity; anaphase-promoting complex-dependent catabolic process; apoptotic process; regulation of Wnt signaling; positive regulation of endopeptidase activity; post-translational protein modification; pre-replicative complex assembly; proteasome-mediated ubiquitin-dependent protein catabolic process; protein deubiquitination; protein polyubiquitination; regulation of cellular amino acid metabolic process; regulation of G1/S transition of mitotic cell cycle; transmembrane transport                                                                                                                                                                                                                                                                                                                                                                                                                                                                                                                                                                                                                                                                                                                                                                                                                                                                                                                               | 0,000 | 36081,7 | 78630,4  | 60058,4 | 37450,0 | 77805,1  | 1,12 |
| sp Q9Y5Y2 NUBP2_HUMAN   | Cytosolic Fe-S cluster assembly factor NUBP2 OS=Homo sapiens OX=9606 GN=NUBP2 PE=1 SV=1                            | 4 iron, 4 sulfur cluster binding; ATPase activity; ATP binding; iron-sulfur cluster binding; metal ion binding; nucleotide binding; cell projection organization; iron-sulfur cluster assembly                                                                                                                                                                                                                                                                                                                                                                                                                                                                                                                                                                                                                                                                                                                                                                                                                                                                                                                                                                                                                                                                                                                                                                                                                                                               | 0,000 | 3785,6  | 8705,8   | 4910,2  | 3698,2  | 9136,3   | 1,20 |
| sp Q8NFF5 FAD1_HUMAN    | FAD synthase OS=Homo sapiens OX=9606 GN=FLAD1 PE=1 SV=1                                                            | ATP binding; FMN adenylyltransferase activity; FAD biosynthetic process; riboflavin metabolic process                                                                                                                                                                                                                                                                                                                                                                                                                                                                                                                                                                                                                                                                                                                                                                                                                                                                                                                                                                                                                                                                                                                                                                                                                                                                                                                                                        | 0,005 | 6221,1  | 14397,0  | 11685,2 | 7286,2  | 15276,9  | 1,21 |
| sp Q5MNZ6 WIPI3_HUMAN   | WD repeat domain phosphoinositide-interacting protein 3 OS=Homo sapiens OX=9606 GN=WDR45B PE=1 SV=2                | phosphatidylinositol-3,5-bisphosphate binding; phosphatidylinositol-3-phosphate binding; TSC1-TSC2 complex binding; autophagosome assembly; autophagy of mitochondrion; autophagy of nucleus; cellular response to starvation; protein lipidation; protein localization to phagophore assembly site                                                                                                                                                                                                                                                                                                                                                                                                                                                                                                                                                                                                                                                                                                                                                                                                                                                                                                                                                                                                                                                                                                                                                          | 0,007 | 4137,0  | 9678,1   | 7092,9  | 3501,1  | 10986,8  | 1,23 |
| sp Q9BXW7 HDHD5_HUMAN   | Haloacid dehalogenase-like hydrolase domain-containing 5 OS=Homo sapiens OX=9606 GN=HDHD5 PE=1 SV=1                | glycerophospholipid biosynthetic process                                                                                                                                                                                                                                                                                                                                                                                                                                                                                                                                                                                                                                                                                                                                                                                                                                                                                                                                                                                                                                                                                                                                                                                                                                                                                                                                                                                                                     | 0,001 | 11048,8 | 26605,3  | 20260,1 | 10986,2 | 21798,5  | 1,27 |
| sp P49915 GUAA_HUMAN    | GMP synthase [glutamine-hydrolyzing] OS=Homo sapiens OX=9606 GN=GMPS PE=1 SV=1                                     | GMP synthase activity; ATP binding; glutamine metabolic process                                                                                                                                                                                                                                                                                                                                                                                                                                                                                                                                                                                                                                                                                                                                                                                                                                                                                                                                                                                                                                                                                                                                                                                                                                                                                                                                                                                              | 0,002 | 51049,9 | 124581,2 | 66104,5 | 57323,3 | 102939,4 | 1,29 |
| sp P13807-2 GYS1_HUMAN  | Isoform 2 of Glycogen [starch] synthase, muscle OS=Homo sapiens OX=9606 GN=GYS1                                    | glycogen biosynthetic process; heart development                                                                                                                                                                                                                                                                                                                                                                                                                                                                                                                                                                                                                                                                                                                                                                                                                                                                                                                                                                                                                                                                                                                                                                                                                                                                                                                                                                                                             | 0,004 | 12251,2 | 29912,4  | 17632,9 | 11898,6 | 29817,2  | 1,29 |
| sp O15260 SURF4_HUMAN   | Surfeit locus protein 4 OS=Homo sapiens OX=9606 GN=SURF4 PE=1 SV=3                                                 | Golgi organization; retrograde vesicle-mediated transport, Golgi to endoplasmic reticulum                                                                                                                                                                                                                                                                                                                                                                                                                                                                                                                                                                                                                                                                                                                                                                                                                                                                                                                                                                                                                                                                                                                                                                                                                                                                                                                                                                    | 0,006 | 46752,8 | 115458,8 | 88125,4 | 49770,1 | 133919,2 | 1,30 |
| sp Q9ULS5 TMCC3_HUMAN   | Transmembrane and coiled-coil domain protein 3 OS=Homo sapiens OX=9606 GN=TMCC3 PE=1 SV=3                          | 14-3-3 protein binding; identical protein binding (Endoplasmic reticulum)                                                                                                                                                                                                                                                                                                                                                                                                                                                                                                                                                                                                                                                                                                                                                                                                                                                                                                                                                                                                                                                                                                                                                                                                                                                                                                                                                                                    | 0,004 | 2366,2  | 6022,3   | 4093,0  | 1593,9  | 6012,2   | 1,35 |
| sp Q9NXE4-3 NSMA3_HUMAN | Isoform 3 of Sphingomyelin phosphodiesterase 4 OS=Homo sapiens OX=9606 GN=SMPD4                                    | metal ion binding; sphingomyelin phosphodiesterase activity; endoplasmic reticulum organization; glycerophospholipid catabolic process                                                                                                                                                                                                                                                                                                                                                                                                                                                                                                                                                                                                                                                                                                                                                                                                                                                                                                                                                                                                                                                                                                                                                                                                                                                                                                                       | 0,006 | 1828,5  | 4753,5   | 3687,2  | 1615,8  | 3958,1   | 1,38 |
| sp O60725 CMT_HUMAN     | Protein-S-isoprenylcysteine O-methyltransferase OS=Homo sapiens OX=9606 GN=ICMT PE=1 SV=1                          | cellular protein modification process; C-terminal protein methylation; MAPK cascade; post-translational protein modification; protein targeting to membrane                                                                                                                                                                                                                                                                                                                                                                                                                                                                                                                                                                                                                                                                                                                                                                                                                                                                                                                                                                                                                                                                                                                                                                                                                                                                                                  | 0,005 | 2297,6  | 5974,0   | 4904,6  | 2073,7  | 6358,6   | 1,38 |
| sp Q9Y6A9 SPCS1_HUMAN   | Signal peptidase complex subunit 1 OS=Homo sapiens OX=9606 GN=SPCS1 PE=1 SV=4                                      | peptidase activity; ribosome binding; protein targeting to ER; proteolysis; signal peptide processing                                                                                                                                                                                                                                                                                                                                                                                                                                                                                                                                                                                                                                                                                                                                                                                                                                                                                                                                                                                                                                                                                                                                                                                                                                                                                                                                                        | 0,002 | 3672,7  | 9710,4   | 9448,5  | 1874,7  | 9472,9   | 1,40 |
| sp Q6YP21 KAT3_HUMAN    | Kynurenine-oxoglutarate transaminase 3 OS=Homo sapiens OX=9606 GN=KYAT3 PE=1 SV=1                                  | 2-oxoglutarate metabolic process; biosynthetic process; cellular amino acid metabolic process; kynurenine metabolic process; L-kynurenine catabolic process                                                                                                                                                                                                                                                                                                                                                                                                                                                                                                                                                                                                                                                                                                                                                                                                                                                                                                                                                                                                                                                                                                                                                                                                                                                                                                  | 0,008 | 5112,8  | 14240,7  | 10108,1 | 5867,1  | 15612,3  | 1,48 |
| sp Q12770-4 SCAP_HUMAN  | Isoform 4 of Sterol regulatory element-binding protein cleavage-activating protein OS=Homo sapiens OX=9606 GN=SCAP | sterol binding; unfolded protein binding; aging; cellular lipid metabolic process; cholesterol metabolic process; COPII-coated vesicle cargo loading; regulation of fatty acid biosynthetic process; response to hypoxia; response to insulin; SREBP signaling pathway                                                                                                                                                                                                                                                                                                                                                                                                                                                                                                                                                                                                                                                                                                                                                                                                                                                                                                                                                                                                                                                                                                                                                                                       | 0,003 | 1609,9  | 4676,5   | 3651,0  | 1680,9  | 5473,3   | 1,54 |
| sp Q6NUM9 RETSAT_HUMAN  | All-trans-retinol 13,14-reductase OS=Homo sapiens OX=9606 GN=RETSAT PE=1 SV=2                                      | saturation of all-trans-retinol to all-trans-13,14-dihydroretinol                                                                                                                                                                                                                                                                                                                                                                                                                                                                                                                                                                                                                                                                                                                                                                                                                                                                                                                                                                                                                                                                                                                                                                                                                                                                                                                                                                                            | 0,007 | 3047,6  | 9164,2   | 6747,3  | 2858,6  | 10129,3  | 1,59 |
| sp Q70UQ0 IKIP_HUMAN    | Inhibitor of nuclear factor kappa-B kinase-interacting protein OS=Homo sapiens OX=9606 GN=IKBIP PE=1 SV=1          |                                                                                                                                                                                                                                                                                                                                                                                                                                                                                                                                                                                                                                                                                                                                                                                                                                                                                                                                                                                                                                                                                                                                                                                                                                                                                                                                                                                                                                                              | 0,008 | 2866,4  | 9035,8   | 4910,2  | 2727,2  | 10587,8  | 1,66 |
| sp O14618 CCS_HUMAN     | Copper chaperone for superoxide dismutase OS=Homo sapiens OX=9606 GN=CCS PE=1 SV=1                                 | cadherin binding; copper ion binding; cellular response to oxidative stress; positive regulation of oxidoreductase activity; protein maturation by copper ion transfer; removal of superoxide radicals; superoxide metabolic process                                                                                                                                                                                                                                                                                                                                                                                                                                                                                                                                                                                                                                                                                                                                                                                                                                                                                                                                                                                                                                                                                                                                                                                                                         | 0,003 | 2894,2  | 9613,7   | 5014,0  | 1340,9  | 9058,7   | 1,73 |
| sp P19525 E2AK2_HUMAN   | Interferon-induced, double-stranded RNA-activated protein kinase OS=Homo sapiens OX=9606 GN=EIF2AK2 PE=1 SV=2      | ATP binding; double-stranded RNA binding; eukaryotic translation initiation factor 2alpha kinase activity; identical protein binding; non-membrane spanning protein tyrosine kinase activity; protein kinase activity; protein serine kinase activity; protein threonine kinase activity; transmembrane receptor protein tyrosine kinase activity; activation of MAPKK activity; cellular response to amino acid starvation; defense response to virus; endoplasmic reticulum unfolded protein response; innate immune response; negative regulation of apoptotic process; negative regulation of osteoblast proliferation; negative regulation of translation; negative regulation of viral genome replication; positive regulation of apoptotic process; positive regulation of chemokine production; positive regulation of cytokine production; positive regulation of NF-kappaB transcription factor activity; positive regulation of NIK/NF-kappaB signaling; positive regulation of stress-activated MAPK cascade; protein autophosphorylation; protein phosphorylation; regulation of hematopoietic progenitor cell differentiation; regulation of hematopoietic stem cell differentiation; regulation of hematopoietic stem cell proliferation; regulation of NLRP3 inflammasome complex assembly; response to interferon-alpha; response to lipopolysaccharide; response to toxic substance; response to virus; response to vitamin E; translation | 0,008 | 3072,5  | 11814,6  | 11122,9 | 2972,5  | 10882,5  | 1,94 |
| sp Q6P1X6 CH082_HUMAN   | UPF0598 protein C8orf82 OS=Homo sapiens OX=9606 GN=C8orf82 PE=1 SV=2                                               |                                                                                                                                                                                                                                                                                                                                                                                                                                                                                                                                                                                                                                                                                                                                                                                                                                                                                                                                                                                                                                                                                                                                                                                                                                                                                                                                                                                                                                                              | 0,004 | 1452,9  | 7950,9   | 4706,9  | 977,1   | 10441,7  | 2,45 |
| sp Q8TF05-2 PP4R1_HUMAN | Isoform 2 of Serine/threonine-protein phosphatase 4 regulatory subunit 1 OS=Homo sapiens OX=9606 GN=PPP4R1         | protein dephosphorylation; protein phosphorylation; signal transduction                                                                                                                                                                                                                                                                                                                                                                                                                                                                                                                                                                                                                                                                                                                                                                                                                                                                                                                                                                                                                                                                                                                                                                                                                                                                                                                                                                                      | 0,001 | 772,1   | 5013,9   | 2202,2  | 554,6   | 5676,0   | 2,70 |

|                         |                                                                                                       |                                                                                                                                                                                                                       |       |         |         |         |         |         |      |
|-------------------------|-------------------------------------------------------------------------------------------------------|-----------------------------------------------------------------------------------------------------------------------------------------------------------------------------------------------------------------------|-------|---------|---------|---------|---------|---------|------|
| sp Q8NCE2 MTMRE_HUMAN   | Myotubularin-related protein 14 OS=Homo sapiens OX=9606 GN=MTMR14 PE=1 SV=2                           | phosphatidylinositol-3-phosphatase activity; protein tyrosine phosphatase activity; macroautophagy; phosphatidylinositol biosynthetic process                                                                         | 0,001 | 1190,4  | 3264,9  | 2363,0  | 1063,7  | 3113,3  | 1,46 |
| sp O15540-2 FABP7_HUMAN | Isoform 2 of Fatty acid-binding protein, brain OS=Homo sapiens OX=9606 GN=FABP7                       | lipid binding; epithelial cell proliferation; negative regulation of cell population proliferation; nervous system development; triglyceride catabolic process                                                        | 0,004 | 1412,6  | 3898,4  | 2191,3  | 1063,7  | 4279,7  | 1,46 |
| sp Q92643 GPI8_HUMAN    | GPI-anchor transamidase OS=Homo sapiens OX=9606 GN=PIGK PE=1 SV=2                                     | attachment of GPI anchor to protein; protein localization to cell surface                                                                                                                                             | 0,004 | 7850,3  | 16234,2 | 12577,3 | 7826,5  | 18328,4 | 1,05 |
| sp Q8WUW1-2 BRK1_HUMAN  | Isoform 2 of Protein BRICK1 OS=Homo sapiens OX=9606 GN=BRK1                                           | protein binding; actin filament organization; cell motility; positive regulation of Arp2/3 complex-mediated actin nucleation; Rac protein signal transduction; regulation of actin polymerization or depolymerization | 0,005 | 16534,1 | 39471,7 | 36667,9 | 17642,2 | 40625,2 | 1,26 |
| sp Q5VWJ9 SNX30_HUMAN   | Sorting nexin-30 OS=Homo sapiens OX=9606 GN=SNX30 PE=1 SV=1                                           | Phosphatidylinositol binding; protein transport; intracellular trafficking                                                                                                                                            | 0,000 | 6938,5  | 17019,6 | 18207,1 | 7531,6  | 16649,3 | 1,29 |
| sp Q96GZ6-9 S41A3_HUMAN | Isoform 9 of Solute carrier family 41 member 3 OS=Homo sapiens OX=9606 GN=SLC41A3                     | cation transmembrane transporter activity                                                                                                                                                                             | 0,003 | 2616,0  | 6919,2  | 4617,7  | 2581,4  | 7174,6  | 1,40 |
| sp Q14728 MFS10_HUMAN   | Major facilitator superfamily domain-containing protein 10 OS=Homo sapiens OX=9606 GN=MFS10 PE=1 SV=1 | organic anion transmembrane transporter activity; tetracycline transmembrane transporter activity; apoptotic process; sodium-independent organic anion transport                                                      | 0,007 | 5507,8  | 15339,6 | 14750,7 | 6755,2  | 16007,8 | 1,48 |
| sp Q9P0S9 TM14C_HUMAN   | Transmembrane protein 14C OS=Homo sapiens OX=9606 GN=TMEM14C PE=1 SV=1                                | erythrocyte differentiation; heme biosynthetic process; mitochondrial transport; regulation of heme biosynthetic process                                                                                              | 0,009 | 2950,1  | 12698,8 | 7440,0  | 3196,0  | 14938,4 | 2,11 |

**DOWNREGULATED**

| PROTEIN                 | GROUP AND RELATED GENE (GN)                                                                                      | GO: BIOLOGICAL FUNCTION                                                                                                                                                                                                                                                                                                                                                                                                                                                                                                      | P-value | Protein Mean Peak Intensity |             |           |           |               | Log <sub>2</sub> FC ISO CT/CT |
|-------------------------|------------------------------------------------------------------------------------------------------------------|------------------------------------------------------------------------------------------------------------------------------------------------------------------------------------------------------------------------------------------------------------------------------------------------------------------------------------------------------------------------------------------------------------------------------------------------------------------------------------------------------------------------------|---------|-----------------------------|-------------|-----------|-----------|---------------|-------------------------------|
|                         |                                                                                                                  |                                                                                                                                                                                                                                                                                                                                                                                                                                                                                                                              |         | Mean CT                     | Mean ISO CT | Mean FRDA | Median CT | Median ISO CT |                               |
| sp Q02539 H11_HUMAN     | Histone H1.1 OS=Homo sapiens OX=9606 GN=HIST1H1A PE=1 SV=3                                                       | chromosome condensation; negative regulation of chromatin silencing; negative regulation of DNA recombination; chromatin binding; double-stranded DNA binding                                                                                                                                                                                                                                                                                                                                                                | 0,000   | 162206,4                    | 7956,5      | 14742,2   | 152890,7  | 7701,6        | -4,35                         |
| sp P40425 PBX2_HUMAN    | Pre-B-cell leukemia transcription factor 2 OS=Homo sapiens OX=9606 GN=PBX2 PE=1 SV=2                             | chromatin binding; DNA-binding transcription activator activity, RNA polymerase II-specific; transcription factor binding; brain development; embryonic limb morphogenesis; embryonic organ development; neuron development; proximal/distal pattern formation; regulation of transcription by RNA polymerase II                                                                                                                                                                                                             | 0,006   | 13857,9                     | 6746,6      | 9320,9    | 13178,8   | 5136,5        | -1,04                         |
| sp Q7Z5J4 RAI1_HUMAN    | Retinoic acid-induced protein 1 OS=Homo sapiens OX=9606 GN=RAI1 PE=1 SV=2                                        | metal ion binding; circadian regulation of gene expression; negative regulation of multicellular organism growth; positive regulation of transcription, DNA-templated; regulation of transcription by RNA polymerase II; skeletal system development                                                                                                                                                                                                                                                                         | 0,000   | 5210,9                      | 1722,1      | 3389,7    | 5262,5    | 1525,6        | -1,60                         |
| sp Q59GN2 R39L5_HUMAN   | Putative 60S ribosomal protein L39-like 5 OS=Homo sapiens OX=9606 GN=RPL39P5 PE=5 SV=2                           | structural constituent of ribosome; translation                                                                                                                                                                                                                                                                                                                                                                                                                                                                              | 0,009   | 52098,5                     | 21273,6     | 29642,0   | 44741,9   | 22690,5       | -1,29                         |
| sp P80723 BASP1_HUMAN   | Brain acid soluble protein 1 OS=Homo sapiens OX=9606 GN=BASP1 PE=1 SV=2                                          | protein domain specific binding; transcription corepressor activity;transcription regulatory region sequence-specific DNA binding; mesenchymal to epithelial transition; negative regulation of transcription, DNA-templated; positive regulation of heart growth; substantia nigra development; thorax and anterior abdomen determination; regulate actin dynamics and presynaptic vesicle cycling at axon terminals, thereby facilitating axonal growth, regeneration, and plasticity                                      | 0,000   | 1687939,3                   | 809983,4    | 1252682,1 | 1646542,2 | 743255,5      | -1,06                         |
| sp Q8N111 CEND_HUMAN    | Cell cycle exit and neuronal differentiation protein 1 OS=Homo sapiens OX=9606 GN=CEND1 PE=1 SV=1                | adult walking behavior; cerebellar granular layer maturation; cerebellar Purkinje cell differentiation; negative regulation of cerebellar granule cell precursor proliferation; radial glia guided migration of cerebellar granule cell                                                                                                                                                                                                                                                                                      | 0,003   | 43229,6                     | 19533,9     | 34504,5   | 42246,7   | 12176,8       | -1,15                         |
| sp Q5R115 COX20_HUMAN   | Cytochrome c oxidase assembly protein COX20, mitochondrial OS=Homo sapiens OX=9606 GN=COX20 PE=1 SV=2            | mitochondrial cytochrome c oxidase assembly                                                                                                                                                                                                                                                                                                                                                                                                                                                                                  | 0,010   | 10517,7                     | 2947,2      | 10087,9   | 8609,5    | 1673,7        | -1,84                         |
| sp Q8WV17 PPR1C_HUMAN   | Protein phosphatase 1 regulatory subunit 1C OS=Homo sapiens OX=9606 GN=PPP1R1C PE=3 SV=1                         | protein phosphatase inhibitor activity; intracellular signal transduction; cell cycle; cell division                                                                                                                                                                                                                                                                                                                                                                                                                         | 0,001   | 43879,7                     | 14664,0     | 39211,4   | 43812,9   | 10588,7       | -1,58                         |
| sp Q15125 EBP_HUMAN     | 3-beta-hydroxysteroid-Delta(8),Delta(7)-isomerase OS=Homo sapiens OX=9606 GN=EBP PE=1 SV=3                       | cholesterol biosynthetic process; cholesterol metabolic process; skeletal system development                                                                                                                                                                                                                                                                                                                                                                                                                                 | 0,000   | 13202,2                     | 4857,6      | 11475,3   | 12039,3   | 4735,5        | -1,44                         |
| sp P56181 NDUV3_HUMAN   | NADH dehydrogenase [ubiquinone] flavoprotein 3, mitochondrial OS=Homo sapiens OX=9606 GN=NDUV3 PE=1 SV=2         | mitochondrial ATP synthesis coupled electron transport; mitochondrial electron transport, NADH to ubiquinone; mitochondrial respiratory chain complex I assembly                                                                                                                                                                                                                                                                                                                                                             | 0,001   | 21572,7                     | 8248,4      | 16136,6   | 19767,9   | 9730,8        | -1,39                         |
| sp Q13555-6 KCC2G_HUMAN | Isoform 6 of Calcium/calmodulin-dependent protein kinase type II subunit gamma OS=Homo sapiens OX=9606 GN=CAMK2G | nervous system development; regulation of calcium ion transport; regulation of neuron projection development; regulation of skeletal muscle adaptation                                                                                                                                                                                                                                                                                                                                                                       | 0,005   | 24381,5                     | 9449,8      | 20862,8   | 29545,1   | 9497,4        | -1,37                         |
| sp P54803 GALC_HUMAN    | Galactocerebrosidase OS=Homo sapiens OX=9606 GN=GALC PE=1 SV=3                                                   | galactosylceramide catabolic process; glycosphingolipid metabolic process; myelination                                                                                                                                                                                                                                                                                                                                                                                                                                       | 0,000   | 20556,2                     | 8195,8      | 15326,0   | 19685,1   | 6534,5        | -1,33                         |
| sp P09382 LEG1_HUMAN    | Galectin-1 OS=Homo sapiens OX=9606 GN=LGALS1 PE=1 SV=2                                                           | carbohydrate binding; identical protein binding; lactose binding; laminin binding; RNA binding apoptotic process; cellular protein metabolic process; cellular response to glucose stimulus; cellular response to organic cyclic compound; myoblast differentiation; negative regulation of cell-substrate adhesion; negative regulation of neuron projection development; plasma cell differentiation; positive regulation of erythrocyte aggregation; positive regulation of I-kappaB kinase/NF-kappaB signaling; positive | 0,002   | 42609,4                     | 17767,9     | 7614,2    | 43715,6   | 11256,9       | -1,26                         |



|                         |                                                                                                                 |                                                                                                                                                                                                                                                                                                                                                                                                                                                                                                                                                                                                                                                                                                                                                                                                                                                                                                                                                                                                                                                                                                                      |       |           |          |           |           |          |       |  |
|-------------------------|-----------------------------------------------------------------------------------------------------------------|----------------------------------------------------------------------------------------------------------------------------------------------------------------------------------------------------------------------------------------------------------------------------------------------------------------------------------------------------------------------------------------------------------------------------------------------------------------------------------------------------------------------------------------------------------------------------------------------------------------------------------------------------------------------------------------------------------------------------------------------------------------------------------------------------------------------------------------------------------------------------------------------------------------------------------------------------------------------------------------------------------------------------------------------------------------------------------------------------------------------|-------|-----------|----------|-----------|-----------|----------|-------|--|
|                         |                                                                                                                 | regulation of viral entry into host cell; post-translational protein modification; regulation of apoptotic process; response to axon injury; response to drug ; response to isolation stress; T cell costimulation                                                                                                                                                                                                                                                                                                                                                                                                                                                                                                                                                                                                                                                                                                                                                                                                                                                                                                   |       |           |          |           |           |          |       |  |
| sp O75781-2 PALM_HUMAN  | Isoform 2 of Paralemmin-1 OS=Homo sapiens OX=9606 GN=PALM                                                       | adenylate cyclase-inhibiting G protein-coupled receptor signaling pathway; cellular response to electrical stimulus; cytoskeleton organization; synapse maturation                                                                                                                                                                                                                                                                                                                                                                                                                                                                                                                                                                                                                                                                                                                                                                                                                                                                                                                                                   | 0,000 | 148105,6  | 62681,7  | 124981,8  | 142596,9  | 66614,7  | -1,24 |  |
| sp P45954 ACADSB_HUMAN  | Short/branched chain specific acyl-CoA dehydrogenase, mitochondrial OS=Homo sapiens OX=9606 GN=ACADSB PE=1 SV=1 | branched-chain amino acid catabolic process; fatty acid metabolic process; isoleucine catabolic process                                                                                                                                                                                                                                                                                                                                                                                                                                                                                                                                                                                                                                                                                                                                                                                                                                                                                                                                                                                                              | 0,004 | 1252,2    | 563,4    | 873,1     | 1314,8    | 405,0    | -1,15 |  |
| sp O75323 NIPSN2_HUMAN  | Protein NipSnap homolog 2 OS=Homo sapiens OX=9606 GN=NIPSNAP2 PE=1 SV=1                                         | mitochondrion organization; oxidative phosphorylation; positive regulation of high voltage-gated calcium channel activity                                                                                                                                                                                                                                                                                                                                                                                                                                                                                                                                                                                                                                                                                                                                                                                                                                                                                                                                                                                            | 0,003 | 8121,5    | 3755,6   | 4617,7    | 7638,6    | 3625,7   | -1,11 |  |
| sp O75663 TIPRL_HUMAN   | TIP41-like protein OS=Homo sapiens OX=9606 GN=TIPRL PE=1 SV=2                                                   | DNA damage checkpoint; negative regulation of phosphoprotein phosphatase activity; regulation of phosphoprotein phosphatase activity; TOR signaling                                                                                                                                                                                                                                                                                                                                                                                                                                                                                                                                                                                                                                                                                                                                                                                                                                                                                                                                                                  | 0,004 | 63340,2   | 29390,8  | 38318,2   | 57436,2   | 18339,7  | -1,11 |  |
| sp Q96GY0 ZC21A_HUMAN   | Zinc finger C2HC domain-containing protein 1A OS=Homo sapiens OX=9606 GN=ZC2HC1A PE=1 SV=2                      | metal ion binding                                                                                                                                                                                                                                                                                                                                                                                                                                                                                                                                                                                                                                                                                                                                                                                                                                                                                                                                                                                                                                                                                                    | 0,010 | 105556,2  | 50530,2  | 91155,5   | 127768,2  | 48731,4  | -1,06 |  |
| sp O15069 NACAD_HUMAN   | NAC-alpha domain-containing protein 1 OS=Homo sapiens OX=9606 GN=NACAD PE=1 SV=3                                | unfolded protein binding; protein targeting to membrane                                                                                                                                                                                                                                                                                                                                                                                                                                                                                                                                                                                                                                                                                                                                                                                                                                                                                                                                                                                                                                                              | 0,000 | 20376,3   | 9873,1   | 15387,7   | 19560,1   | 11527,6  | -1,05 |  |
| sp P05413 FABPH_HUMAN   | Fatty acid-binding protein, heart OS=Homo sapiens OX=9606 GN=FABP3 PE=1 SV=4                                    | cytoskeletal protein binding; icosatetraenoic acid binding; long-chain fatty acid binding; long-chain fatty acid transporter activity; oleic acid binding brown fat cell differentiation; cholesterol homeostasis; fatty acid metabolic process; intracellular lipid transport; long-chain fatty acid transport; negative regulation of cell population proliferation; phospholipid homeostasis; positive regulation of long-chain fatty acid import into cell; positive regulation of phospholipid biosynthetic process; regulation of fatty acid oxidation; regulation of phosphatidylcholine biosynthetic process; response to drug; response to fatty acid; response to insulin; triglyceride catabolic process                                                                                                                                                                                                                                                                                                                                                                                                  | 0,001 | 35322,0   | 9372,6   | 11533,1   | 33570,8   | 8549,3   | -1,91 |  |
| sp O75056 SDC3_HUMAN    | Syndecan-3 OS=Homo sapiens OX=9606 GN=SDC3 PE=1 SV=2                                                            | identical protein binding; cell migration; glycosaminoglycan biosynthetic process; glycosaminoglycan catabolic process; leukocyte migration; retinoid metabolic process; may have a role in the organization of cell shape by affecting the actin cytoskeleton, possibly by transferring signals from the cell surface in a sugar-dependent mechanism                                                                                                                                                                                                                                                                                                                                                                                                                                                                                                                                                                                                                                                                                                                                                                | 0,003 | 29250,0   | 6666,0   | 11609,7   | 29752,7   | 2764,7   | -2,13 |  |
| sp O75061-4 AUX1_HUMAN  | Isoform 4 of Putative tyrosine-protein phosphatase auxilin OS=Homo sapiens OX=9606 GN=DNAJC6                    | clathrin binding; protein tyrosine phosphatase activity; clathrin coat disassembly; clathrin-dependent endocytosis; membrane organization; post-Golgi vesicle-mediated transport; regulation of clathrin-dependent endocytosis; synaptic vesicle uncoating                                                                                                                                                                                                                                                                                                                                                                                                                                                                                                                                                                                                                                                                                                                                                                                                                                                           | 0,003 | 46130,1   | 13027,2  | 30196,2   | 42984,9   | 9906,2   | -1,82 |  |
| sp P04271 S100B_HUMAN   | Protein S100-B OS=Homo sapiens OX=9606 GN=S100B PE=1 SV=2                                                       | Calcium-dependent protein binding; calcium ion binding; identical protein binding; protein homodimerization activity; RAGE receptor binding; S100 protein binding; tau protein binding; zinc ion binding axonogenesis; central nervous system development; innate immune response; learning or memory; positive regulation of cell population proliferation; positive regulation of I-kappaB kinase/NF-kappaB signaling                                                                                                                                                                                                                                                                                                                                                                                                                                                                                                                                                                                                                                                                                              | 0,002 | 4858,3    | 1452,5   | 1181,2    | 5091,4    | 1199,2   | -1,74 |  |
| sp P05067-3 A4_HUMAN    | Isoform L-APP677 of Amyloid-beta precursor protein OS=Homo sapiens OX=9606 GN=APP                               | acetylcholine receptor activator activity; chaperone; chemoattractant activity; chromatin binding; DNA binding; enzyme binding; G protein-coupled receptor binding; growth factor receptor binding; heparan sulfate binding; integrin binding; activation of MAPK activity; adult locomotory behavior; axo-dendritic transport; axon midline choice point recognition; axonogenesis; calcium-mediated signaling; cell adhesion; cellular copper ion homeostasis; cellular process; cellular protein metabolic process; cellular response to amyloid-beta; cellular response to cAMP; dendrite development; endocytosis; extracellular matrix organization; locomotory behavior; modulation of excitatory postsynaptic potential; negative regulation of gene expression; negative regulation of long-term synaptic potentiation; negative regulation of mitochondrion organization; negative regulation of neuron death; neuromuscular process controlling balance; neuron projection development; neuron projection maintenance; neuron remodeling; synapse organization; synaptic growth at neuromuscular junction | 0,002 | 79564,4   | 33268,8  | 69069,6   | 71795,5   | 30510,9  | -1,26 |  |
| sp P17677 NEUM_HUMAN    | Neuromodulin OS=Homo sapiens OX=9606 GN=GAP43 PE=1 SV=1                                                         | calmodulin binding; phosphatidylinositol phosphate binding; phosphatidylserine binding; axon choice point recognition; axon regeneration; cell fate commitment; glial cell differentiation; protein kinase C-activating G protein-coupled receptor signaling pathway; regulation of filopodium assembly; regulation of growth; regulation of postsynaptic specialization assembly; response to wounding; tissue regeneration                                                                                                                                                                                                                                                                                                                                                                                                                                                                                                                                                                                                                                                                                         | 0,000 | 1235395,2 | 546870,5 | 1034495,6 | 1253315,8 | 566231,3 | -1,18 |  |
| sp Q02952-3 AKA12_HUMAN | Isoform 3 of A-kinase anchor protein 12 OS=Homo sapiens OX=9606 GN=AKAP12                                       | adenylate cyclase binding; calmodulin binding; protein kinase A binding; modulation of chemical synaptic transmission; positive regulation of ERK1 and ERK2 cascade; response to electrical stimulus; response to lipopolysaccharide; positive regulation of oligodendrocyte apoptotic process                                                                                                                                                                                                                                                                                                                                                                                                                                                                                                                                                                                                                                                                                                                                                                                                                       | 0,000 | 98199,7   | 47148,5  | 79823,6   | 99442,5   | 45654,0  | -1,06 |  |
| sp O75351 VPS4B_HUMAN   | Vacuolar protein sorting-associated protein 4B OS=Homo sapiens OX=9606 GN=VPS4B PE=1 SV=2                       | ATPase activity; ATP binding; identical protein binding; microtubule-severing ATPase activity; protein homodimerization activity                                                                                                                                                                                                                                                                                                                                                                                                                                                                                                                                                                                                                                                                                                                                                                                                                                                                                                                                                                                     | 0,001 | 16493,4   | 8083,9   | 10462,6   | 17530,9   | 7044,3   | -1,03 |  |
| sp O60636 TSN2_HUMAN    | Tetraspanin-2 OS=Homo sapiens OX=9606 GN=TSPAN2 PE=1 SV=2                                                       | astrocyte development; axon development; brain development; inflammatory response; microglia development; myelination; oligodendrocyte differentiation                                                                                                                                                                                                                                                                                                                                                                                                                                                                                                                                                                                                                                                                                                                                                                                                                                                                                                                                                               | 0,009 | 1806,3    | 808,5    | 1340,4    | 1759,7    | 759,1    | -1,16 |  |
| sp Q13740 CD166_HUMAN   | CD166 antigen OS=Homo sapiens OX=9606 GN=ALCAM PE=1 SV=2                                                        | protein binding; axon extension involved in axon guidance; cell adhesion; heterophilic cell-cell adhesion via plasma membrane cell adhesion molecules; neuron projection extension; signal transduction                                                                                                                                                                                                                                                                                                                                                                                                                                                                                                                                                                                                                                                                                                                                                                                                                                                                                                              | 0,009 | 237315,0  | 53443,3  | 144044,7  | 228995,8  | 53646,2  | -2,15 |  |
| sp O00203-3 AP3B1_HUMAN | Isoform 2 of AP-3 complex subunit beta-1 OS=Homo sapiens OX=9606 GN=AP3B1                                       | GTP-dependent protein binding; anterograde axonal transport; anterograde synaptic vesicle transport; establishment of protein localization to mitochondrial membrane involved in mitochondrial fission; mRNA transcription by RNA polymerase II                                                                                                                                                                                                                                                                                                                                                                                                                                                                                                                                                                                                                                                                                                                                                                                                                                                                      | 0,000 | 233981,0  | 54492,8  | 188646,5  | 228019,4  | 36883,8  | -2,10 |  |
| sp Q9UGI8 TES_HUMAN     | Testin OS=Homo sapiens OX=9606 GN=TES PE=1 SV=1                                                                 | cadherin binding; RNA binding; negative regulation of cell population proliferation; may play a role in cell adhesion, cell spreading and in the reorganization of the actin cytoskeleton                                                                                                                                                                                                                                                                                                                                                                                                                                                                                                                                                                                                                                                                                                                                                                                                                                                                                                                            | 0,001 | 45960,6   | 10767,2  | 40885,9   | 47701,8   | 9723,2   | -2,09 |  |
| sp Q9NR46 SHLB2_HUMAN   | Endophilin-B2 OS=Homo sapiens OX=9606 GN=SH3GLB2 PE=1 SV=1                                                      | Cadherin binding; identical protein binding                                                                                                                                                                                                                                                                                                                                                                                                                                                                                                                                                                                                                                                                                                                                                                                                                                                                                                                                                                                                                                                                          | 0,001 | 29053,1   | 7041,0   | 6385,6    | 26340,0   | 2752,1   | -2,04 |  |

|                        |                                                                                                |                                                                                                                                                                                                                                                                                                                                                                                                                                                                                                                                                                                                                                                                                                                                                                                                                                                                                                                                                                                                  |       |           |           |           |           |           |       |
|------------------------|------------------------------------------------------------------------------------------------|--------------------------------------------------------------------------------------------------------------------------------------------------------------------------------------------------------------------------------------------------------------------------------------------------------------------------------------------------------------------------------------------------------------------------------------------------------------------------------------------------------------------------------------------------------------------------------------------------------------------------------------------------------------------------------------------------------------------------------------------------------------------------------------------------------------------------------------------------------------------------------------------------------------------------------------------------------------------------------------------------|-------|-----------|-----------|-----------|-----------|-----------|-------|
| sp P07196 NFL_HUMAN    | Neurofilament light polypeptide OS=Homo sapiens OX=9606 GN=NEFL PE=1 SV=3                      | protein binding; phospholipase binding; structural constituent of cytoskeleton; structural constituent of postsynaptic intermediate filament cytoskeleton; anterograde axonal transport; axonal transport of mitochondrion; intermediate filament organization; intermediate filament polymerization or depolymerization; locomotion; MAPK cascade; microtubule cytoskeleton organization; negative regulation of neuron apoptotic process; neurofilament bundle assembly; neurofilament cytoskeleton organization; neuromuscular process controlling balance; neuron projection morphogenesis; peripheral nervous system axon regeneration; positive regulation of axonogenesis; protein polymerization; regulation of axon diameter; regulation of NMDA receptor activity; response to acrylamide; response to corticosterone; response to peptide hormone; response to sodium arsenite; response to toxic substance; retrograde axonal transport; spinal cord development; synapse maturation | 0,001 | 7321839,6 | 2300996,1 | 4732646,2 | 6625586,3 | 1986276,0 | -1,67 |
| sp O00151 PDL1_HUMAN   | PDZ and LIM domain protein 1 OS=Homo sapiens OX=9606 GN=PDLIM1 PE=1 SV=4                       | actin binding; cadherin binding involved in cell-cell adhesion; metal ion binding; muscle alpha-actinin binding; transcription coactivator activity; actin cytoskeleton organization; establishment or maintenance of actin cytoskeleton polarity; heart development; maintenance of cell polarity; muscle structure development; regulation of transcription by RNA polymerase II; response to hypoxia; response to oxidative stress; stress fiber assembly                                                                                                                                                                                                                                                                                                                                                                                                                                                                                                                                     | 0,000 | 90040,9   | 30387,5   | 50060,9   | 85171,0   | 21241,2   | -1,57 |
| sp P09493-5 TPM1_HUMAN | Isoform 5 of Tropomyosin alpha-1 chain OS=Homo sapiens OX=9606 GN=TPM1                         | actin binding; actin filament binding; cytoskeletal protein binding; identical protein binding; protein heterodimerization activity; protein homodimerization activity; structural constituent of cytoskeleton; structural constituent of muscle                                                                                                                                                                                                                                                                                                                                                                                                                                                                                                                                                                                                                                                                                                                                                 | 0,005 | 37645,8   | 13192,8   | 22935,8   | 35785,7   | 14387,8   | -1,51 |
| sp Q9UM54-6 MYO6_HUMAN | Isoform 6 of Unconventional myosin-VI OS=Homo sapiens OX=9606 GN=MYO6                          | actin binding; actin-dependent ATPase activity; actin filament binding; ADP binding; ATP binding; calmodulin binding; microfilament motor activity; actin filament-based movement; actin filament organization; DNA damage response, signal transduction by p53 class mediator; endocytosis; vesicle transport along actin filament                                                                                                                                                                                                                                                                                                                                                                                                                                                                                                                                                                                                                                                              | 0,001 | 19060,2   | 7091,1    | 12330,3   | 17728,2   | 6665,2    | -1,43 |
| sp Q9HCM2 PLXA4_HUMAN  | Plexin-A4 OS=Homo sapiens OX=9606 GN=PLXNA4 PE=1 SV=4                                          | semaphorin receptor activity; negative regulation of cell adhesion; positive regulation of axonogenesis; regulation of axon extension involved in axon guidance; regulation of cell migration; regulation of cell shape; semaphorin-plexin signaling pathway involved in axon guidance                                                                                                                                                                                                                                                                                                                                                                                                                                                                                                                                                                                                                                                                                                           | 0,005 | 64963,2   | 25731,0   | 62063,4   | 56792,2   | 29293,1   | -1,34 |
| sp Q9UHC6 CNTP2_HUMAN  | Contactin-associated protein-like 2 OS=Homo sapiens OX=9606 GN=CNTNAP2 PE=1 SV=1               | enzyme binding; brain development; cell adhesion; clustering of voltage-gated potassium channels; learning; limbic system development; neuron projection development; neuron projection morphogenesis; neuron recognition; positive regulation of gap junction assembly; protein localization to juxtaparanode region of axon; transmission of nerve impulse                                                                                                                                                                                                                                                                                                                                                                                                                                                                                                                                                                                                                                     | 0,004 | 35970,4   | 14632,0   | 27178,2   | 35855,8   | 13537,0   | -1,30 |
| sp O15394 NCAM2_HUMAN  | Neural cell adhesion molecule 2 OS=Homo sapiens OX=9606 GN=NCAM2 PE=1 SV=2                     | identical protein binding; axonal fasciculation; neuron cell-cell adhesion                                                                                                                                                                                                                                                                                                                                                                                                                                                                                                                                                                                                                                                                                                                                                                                                                                                                                                                       | 0,000 | 67221,9   | 27533,9   | 85653,3   | 72958,3   | 25818,9   | -1,29 |
| sp Q7Z2K8 GRIN1_HUMAN  | G protein-regulated inducer of neurite outgrowth 1 OS=Homo sapiens OX=9606 GN=GPRIN1 PE=1 SV=2 | phosphoprotein binding; neuron projection development                                                                                                                                                                                                                                                                                                                                                                                                                                                                                                                                                                                                                                                                                                                                                                                                                                                                                                                                            | 0,000 | 104499,0  | 45276,8   | 74697,8   | 104184,8  | 35785,5   | -1,21 |
| sp O15143 ARC1B_HUMAN  | Actin-related protein 2/3 complex subunit 1B OS=Homo sapiens OX=9606 GN=ARPC1B PE=1 SV=3       | Arp2/3 complex-mediated actin nucleation; ephrin receptor signaling pathway; Fc-gamma receptor signaling pathway involved in phagocytosis; response to estradiol; response to estrogen; actin binding; structural constituent of cytoskeleton                                                                                                                                                                                                                                                                                                                                                                                                                                                                                                                                                                                                                                                                                                                                                    | 0,003 | 19370,0   | 9225,2    | 5806,3    | 17823,9   | 7009,7    | -1,07 |
| sp P04216 THY1_HUMAN   | Thy-1 membrane glycoprotein OS=Homo sapiens OX=9606 GN=THY1 PE=1 SV=2                          | GPI anchor binding; GTPase activator activity; integrin binding; protein kinase binding; cell-cell adhesion; cell-cell signaling; cytoskeleton organization; focal adhesion assembly; integrin-mediated signaling pathway; regulation of axonogenesis; negative regulation of neuron projection regeneration; positive regulation of focal adhesion assembly; positive regulation of heterotypic cell-cell adhesion; positive regulation of release of sequestered calcium ion into cytosol; regulation of cell-matrix adhesion calcium ion binding; extracellular matrix binding; glycosaminoglycan binding; metalloendopeptidase inhibitor activity; extracellular matrix organization; positive regulation of cell motility; positive regulation of cell-substrate adhesion; regulation of cell differentiation; synapse assembly                                                                                                                                                             | 0,000 | 136683,3  | 65449,2   | 131625,4  | 129246,4  | 62074,0   | -1,06 |
| sp Q92563 TICN2_HUMAN  | Testican-2 OS=Homo sapiens OX=9606 GN=SPOCK2 PE=1 SV=1                                         | identical protein binding; structural molecule activity; cellular protein localization; cellular response to hypoxia; DNA double-strand break attachment to nuclear envelope; establishment or maintenance of microtubule; cytoskeleton polarity; IRE1-mediated unfolded protein response; mitotic nuclear envelope reassembly; muscle organ development; negative regulation of cardiac muscle hypertrophy in response to stress; negative regulation of cell population proliferation; nuclear envelope organization; positive regulation of cell aging; protein localization to nucleus; regulation of cell migration; regulation of telomere maintenance; nuclear assembly, chromatin organization, nuclear membrane and telomere dynamics; required for normal development of peripheral nervous system and skeletal muscle and for muscle satellite cell proliferation                                                                                                                     | 0,010 | 15479,4   | 7427,4    | 9968,4    | 14369,5   | 7028,8    | -1,06 |
| sp P02545 LMNA_HUMAN   | Prelamin-A/C OS=Homo sapiens OX=9606 GN=LMNA PE=1 SV=1                                         | identical protein binding; structural molecule activity; cellular protein localization; cellular response to hypoxia; DNA double-strand break attachment to nuclear envelope; establishment or maintenance of microtubule; cytoskeleton polarity; IRE1-mediated unfolded protein response; mitotic nuclear envelope reassembly; muscle organ development; negative regulation of cardiac muscle hypertrophy in response to stress; negative regulation of cell population proliferation; nuclear envelope organization; positive regulation of cell aging; protein localization to nucleus; regulation of cell migration; regulation of telomere maintenance; nuclear assembly, chromatin organization, nuclear membrane and telomere dynamics; required for normal development of peripheral nervous system and skeletal muscle and for muscle satellite cell proliferation                                                                                                                     | 0,001 | 50695,3   | 24589,4   | 24063,7   | 46463,5   | 24973,7   | -1,04 |
| sp Q9Y639 NPTN_HUMAN   | Neuroplastin OS=Homo sapiens OX=9606 GN=NPTN PE=1 SV=2                                         | cell adhesion molecule binding; cell-cell adhesion mediator activity; ion channel binding; axon guidance; cellular calcium ion homeostasis; dendrite self-avoidance; excitatory synapse assembly; homophilic cell adhesion via plasma membrane adhesion molecules; long-term synaptic potentiation; negative regulation of cytokine production; positive regulation of cellular protein localization; positive regulation of cytosolic calcium ion concentration; positive regulation of ERK1 and ERK2 cascade; positive regulation of fibroblast growth factor receptor signaling pathway; positive regulation of long-term neuronal synaptic plasticity; positive regulation of long-term synaptic potentiation; positive regulation of neuron projection development; positive regulation of protein phosphorylation; regulation of receptor localization to synapse; trans-synaptic signaling by trans-synaptic complex, modulating synaptic transmission                                    | 0,000 | 134619,3  | 65472,8   | 91972,8   | 134484,9  | 59869,0   | -1,04 |
| sp P32004 L1CAM_HUMAN  | Neural cell adhesion molecule L1 OS=Homo sapiens OX=9606 GN=L1CAM PE=1 SV=2                    | axon guidance receptor activity; protein domain specific binding; axon development; axon guidance; cell adhesion; cell-matrix adhesion; chemotaxis; homophilic cell adhesion via plasma membrane adhesion molecules; nervous system development; neuron projection development; positive regulation of axon extension; synapse organization                                                                                                                                                                                                                                                                                                                                                                                                                                                                                                                                                                                                                                                      | 0,000 | 394117,0  | 192357,9  | 342555,6  | 371148,3  | 167235,0  | -1,03 |
| sp Q92572 AP3S1_HUMAN  | AP-3 complex subunit sigma-1 OS=Homo sapiens OX=9606 GN=AP3S1 PE=1 SV=1                        | anterograde axonal transport; anterograde synaptic vesicle transport; insulin receptor signaling pathway; intracellular protein transport; vesicle-mediated transport                                                                                                                                                                                                                                                                                                                                                                                                                                                                                                                                                                                                                                                                                                                                                                                                                            | 0,007 | 14932,6   | 7338,2    | 10737,1   | 14273,4   | 8550,7    | -1,02 |
| sp P13987 CD59_HUMAN   | CD59 glycoprotein OS=Homo sapiens OX=9606 GN=CD59 PE=1 SV=1                                    | complement binding; cell surface receptor signaling pathway; endoplasmic reticulum to Golgi vesicle-mediated transport                                                                                                                                                                                                                                                                                                                                                                                                                                                                                                                                                                                                                                                                                                                                                                                                                                                                           | 0,001 | 43373,9   | 20512,1   | 42075,7   | 41121,0   | 14890,7   | -1,08 |
| sp O95297 MPZL1_HUMAN  | Myelin protein zero-like protein 1 OS=Homo sapiens OX=9606 GN=MPZL1 PE=1 SV=1                  | structural molecule activity; cell-cell signaling; transmembrane receptor protein tyrosine kinase signaling pathway                                                                                                                                                                                                                                                                                                                                                                                                                                                                                                                                                                                                                                                                                                                                                                                                                                                                              | 0,002 | 31014,3   | 15436,6   | 26992,5   | 26668,5   | 14530,2   | -1,01 |
| sp O43761 SNG3_HUMAN   | Synaptogyrin-3 OS=Homo sapiens OX=9606 GN=SYNGR3 PE=1 SV=2                                     | positive regulation of transporter activity; regulated exocytosis                                                                                                                                                                                                                                                                                                                                                                                                                                                                                                                                                                                                                                                                                                                                                                                                                                                                                                                                | 0,001 | 2530,7    | 752,7     | 2269,3    | 2330,9    | 800,3     | -1,75 |

|                       |                                                                                             |                                                                                                                                                                                                                                                                                         |              |                |                |         |         |         |       |
|-----------------------|---------------------------------------------------------------------------------------------|-----------------------------------------------------------------------------------------------------------------------------------------------------------------------------------------------------------------------------------------------------------------------------------------|--------------|----------------|----------------|---------|---------|---------|-------|
| sp Q4VC31 CCD58_HUMAN | Coiled-coil domain-containing protein 58 OS=Homo sapiens OX=9606 GN=CCDC58 PE=1 SV=1        | Mitochondrial Matrix Import Factor 23                                                                                                                                                                                                                                                   | <b>0,001</b> | <b>24128,2</b> | <b>9611,4</b>  | 13886,8 | 21924,3 | 8024,0  | -1,33 |
| sp O60641 AP180_HUMAN | Clathrin coat assembly protein AP180 OS=Homo sapiens OX=9606 GN=SNAP91 PE=1 SV=2            | 1-phosphatidylinositol binding; clathrin heavy chain binding; clathrin coat assembly; clathrin-dependent endocytosis; protein transport; regulation of clathrin-dependent endocytosis; synaptic vesicle budding from presynaptic endocytic zone membrane; vesicle budding from membrane | <b>0,006</b> | <b>55052,5</b> | <b>21985,7</b> | 52741,6 | 60405,0 | 19703,7 | -1,32 |
| sp Q13433 S39A6_HUMAN | Zinc transporter ZIP6 OS=Homo sapiens OX=9606 GN=SLC39A6 PE=1 SV=3                          | amino acid transmembrane transport; glutamine transport; sodium ion transport                                                                                                                                                                                                           | <b>0,005</b> | <b>7822,4</b>  | <b>3180,8</b>  | 6332,6  | 6754,3  | 3005,9  | -1,30 |
| sp Q8TAC9 SCAM5_HUMAN | Secretory carrier-associated membrane protein 5 OS=Homo sapiens OX=9606 GN=SCAMP5 PE=1 SV=1 | protein-containing complex binding; exocytosis; negative regulation of endocytosis; positive regulation of calcium ion-dependent exocytosis; positive regulation of cytokine production; protein transport; response to endoplasmic reticulum stress                                    | <b>0,001</b> | <b>29310,3</b> | <b>13752,6</b> | 22589,0 | 28484,3 | 10957,2 | -1,09 |
| sp Q8TC26 TM163_HUMAN | Transmembrane protein 163 OS=Homo sapiens OX=9606 GN=TMEM163 PE=2 SV=1                      | zinc ion import into synaptic vesicle                                                                                                                                                                                                                                                   | <b>0,000</b> | <b>38717,6</b> | <b>18369,4</b> | 27010,1 | 36727,5 | 15172,3 | -1,08 |
